# Supplementary material
Source: PubMed Central journal article supplement (PMC4148798)
Supplement: AEM.00592-14_zam999105518so1.pdf [file AEM.00592-14_zam999105518so1.pdf]

**Table S1:** Details of SRA accession numbers (data type, description and accession numbers).

| Type       | Description                                                                                                               | Accession number |
|------------|---------------------------------------------------------------------------------------------------------------------------|------------------|
| STUDY      | PRJNA238554                                                                                                               | SRP038099        |
| SAMPLE     | S <sub>C1</sub> - Surface layer from the cold seep core                                                                   | SRS560591        |
| EXPERIMENT | Bact1 region                                                                                                              | SRX472579        |
| RUN        | Bacterial diversity (V4 hypervariable region) in surface cold seep sediments (Zhou's extraction)                          | SRR1171518       |
| RUN        | Bacterial diversity (V4 hypervariable region) in surface cold seep sediments (Kit extraction)                             | SRR1221428       |
| EXPERIMENT | Bact2 region                                                                                                              | SRX512630        |
| RUN        | Bacterial diversity (V5-V6 hypervariable region) in surface cold seep sediments (Zhou's extraction)                       | SRR1221425       |
| RUN        | Bacterial diversity (V5-V6 hypervariable regions) in surface cold seep sediments (Kit extraction)                         | SRR1221427       |
| EXPERIMENT | Arch1 region                                                                                                              | SRX512633        |
| RUN        | Archaeal diversity (V2-V3 hypervariable regions) in surface cold seep sediments (Zhou's extraction)                       | SRR1221430       |
| RUN        | Archaeal diversity (V2-V3 hypervariable regions) in surface cold seep sediments (Kit extraction)                          | SRR1221431       |
| EXPERIMENT | Arch2 region                                                                                                              | SRX512634        |
| RUN        | Archaeal diversity (V5-V6 hypervariable regions) in surface cold seep sediments (Zhou's extraction)                       | SRR1221433       |
| RUN        | Archaeal diversity (V5-V6 hypervariable regions) in surface cold seep sediments (Kit extraction)                          | SRR1221434       |
| SAMPLE     | S <sub>C6</sub> - Bottom layer from the cold seep site                                                                    | SRS589876        |
| EXPERIMENT | Bact1 region SC6                                                                                                          | SRX512635        |
| RUN        | Bacterial diversity (V4 hypervariable region) in deep cold seep sediments (Zhou's extraction)                             | SRR1221435       |
| RUN        | Bacterial diversity (V4 hypervariable region) in deep cold seep sediments (Kit extraction)                                | SRR1221438       |
| EXPERIMENT | Bact2 region SC6                                                                                                          | SRX512647        |
| RUN        | Bacterial diversity (V5-V6 hypervariable regions) in deep cold seep sediments (Zhou's extraction)                         | SRR1221558       |
| RUN        | Bacterial diversity (V5-V6 hypervariable regions) in deep cold seep sediments (Kit extraction)                            | SRR1221559       |
| EXPERIMENT | Arch1 region SC6                                                                                                          | SRX512648        |
| RUN        | Archaeal diversity (V2-V3 hypervariable regions) in deep cold seep sediments (Zhou's extraction)                          | SRR1221560       |
| RUN        | Archaeal diversity (V2-V3 hypervariable regions) in deep cold seep sediments (Kit extraction)                             | SRR1221561       |
| EXPERIMENT | Arch2 region SC6                                                                                                          | SRX512650        |
| RUN        | Archaeal diversity (V5-V6 hypervariable regions) in deep cold seep sediments (Zhou's extraction)                          | SRR1221563       |
| RUN        | Archaeal diversity (V5-V6 hypervariable regions) in deep cold seep sediments (Kit extraction)                             | SRR1221567       |
| SAMPLE     | S <sub>H1</sub> - Surface layer from the hydrothermal vent core                                                           | SRS589879        |
| EXPERIMENT | Bact1 region SH1                                                                                                          | SRX512637        |
| RUN        | Bacterial diversity (V4 hypervariable region) in surface hydrothermal vent sediments (Zhou's extraction - Replicate 1)    | SRR1221584       |
| RUN        | Bacterial diversity (V4 hypervariable region) in surface hydrothermal vent sediments (Kit extraction - Replicate 1)       | SRR1221592       |
| RUN        | Bacterial diversity (V4 hypervariable region) in surface hydrothermal vent sediments (Zhou's extraction - Replicate 2)    | SRR1221601       |
| RUN        | Bacterial diversity (V4 hypervariable region) in surface hydrothermal vent sediments (Kit extraction - Replicate 2)       | SRR1221617       |
| EXPERIMENT | Bact2 region SH1                                                                                                          | SRX512663        |
| RUN        | Bacterial diversity (V5-V6 hypervariable region) in surface hydrothermal vent sediments (Zhou's extraction - Replicate 1) | SRR1221645       |
| RUN        | Bacterial diversity (V5-V6 hypervariable region) in surface hydrothermal vent sediments (Kit extraction - Replicate 1)    | SRR1221656       |
| RUN        | Bacterial diversity (V5-V6 hypervariable region) in surface hydrothermal vent sediments (Zhou's extraction - Replicate 2) | SRR1221678       |
| RUN        | Bacterial diversity (V5-V6 hypervariable region) in surface hydrothermal vent sediments (Kit extraction - Replicate 2)    | SRR1221684       |
| EXPERIMENT | Arch1 region SH1                                                                                                          | SRX512666        |
| RUN        | Archaeal diversity (V2-V3 hypervariable regions) in surface hydrothermal vent sediments (Zhou's extraction - Replicate 1) | SRR1221686       |
| RUN        | Archaeal diversity (V2-V3 hypervariable regions) in surface hydrothermal vent sediments (Kit extraction - Replicate 1)    | SRR1221687       |
| RUN        | Archaeal diversity (V2-V3 hypervariable regions) in surface hydrothermal vent sediments (Zhou's extraction - Replicate 2) | SRR1221689       |
| RUN        | Archaeal diversity (V2-V3 hypervariable regions) in surface hydrothermal vent sediments (Kit extraction - Replicate 2)    | SRR1221690       |
| EXPERIMENT | Arch2 region SH1                                                                                                          | SRX512667        |
| RUN        | Archaeal diversity (V5-V6 hypervariable regions) in surface hydrothermal vent sediments (Zhou's extraction - Replicate 1) | SRR1221691       |
| RUN        | Archaeal diversity (V5-V6 hypervariable regions) in surface hydrothermal vent sediments (Kit extraction - Replicate 1)    | SRR1221692       |
| RUN        | Archaeal diversity (V5-V6 hypervariable regions) in surface hydrothermal vent sediments (Zhou's extraction - Replicate 2) | SRR1221693       |
| RUN        | Archaeal diversity (V5-V6 hypervariable regions) in surface hydrothermal vent sediments (Kit extraction - Replicate 2)    | SRR1221695       |

**Table S2:** List of sequences included in our reference database and associated details (NCBI accession numbers, reference publications, associated affiliations and affiliations used in our database).

| NCBI Accession Numbers | Affiliations used in NCBI                                             | Reference publications | Affiliations used in reference publications | Affiliations used in our database     |
|------------------------|-----------------------------------------------------------------------|------------------------|---------------------------------------------|---------------------------------------|
| AF035722               | <i>Calypptogena</i> sp. Florida gill symbiont                         | (1)                    | Thioautotrophic symbionts                   | CGS1                                  |
| AF035723               | <i>Calypptogena pacifica</i> gill symbiont                            | (1)                    | Thioautotrophic symbionts                   | CGS1                                  |
| AJ745718               | thiotrophic bacterial endosymbiont of <i>Bathymodiolus</i> sp.        | (1)                    | Thioautotrophic symbionts                   | CGS1                                  |
| AM236331               | thiotrophic bacterial endosymbiont of <i>Bathymodiolus brooksi</i>    | (1)                    | Thioautotrophic symbionts                   | CGS1                                  |
| M99445                 | <i>Bathymodiolus thermophilus</i> thioautotrophic gill symbiont       | (1)                    | Thioautotrophic symbionts                   | CGS1                                  |
| AB042413               | <i>Maoritithys hadalis</i> gill thioautotrophic symbiont I            | (1)                    | Thioautotrophic symbionts                   | CGS1                                  |
| AY542558               | uncultured gamma proteobacterium                                      | (1)                    | Thioautotrophic symbionts                   | Gammaproteobacteria                   |
| DQ232903               | endosymbiont of Vestimentiferan tubeworm                              | (1)                    | Thioautotrophic symbionts                   | CGS2_b                                |
| AF420364               | uncultured proteobacterium                                            | (1)                    | Gammaproteobacteria                         | CGS2_b                                |
| AJ535246               | uncultured gamma proteobacterium                                      | (1)                    | Gammaproteobacteria                         | Gammaproteobacteria                   |
| AB036710               | <i>Bathymodiolus platifrons</i> methanotrophic gill symbiont          | (1)                    | Methanotrophic symbionts                    | Methylococcales                       |
| U05595                 | methanotrophic gill symbiont of mussel                                | (1)                    | Methanotrophic symbionts                    | Methylococcales                       |
| AJ745717               | methanotrophic bacterial endosymbiont of <i>Bathymodiolus</i> sp.     | (1)                    | Methanotrophic symbionts                    | Methylococcales                       |
| AM236330               | methanotrophic bacterial endosymbiont of <i>Bathymodiolus brooksi</i> | (1)                    | Methanotrophic symbionts                    | Methylococcales                       |
| L20840                 | <i>Methylomonas methanica</i>                                         | (1)                    | <i>Methylomonas methanica</i>               | <i>Methylomonas methanica</i>         |
| AF304195               | <i>Methylobacter luteus</i>                                           | (1)                    | <i>Methylobacter luteus</i>                 | <i>Methylobacter luteus</i>           |
| X82145                 | <i>Alteromonas macleodii</i>                                          | (1)                    | <i>Alteromonas macleodii</i>                | <i>Alteromonas macleodii</i>          |
| AY592403               | uncultured bacterium                                                  | (1)                    | Deltaproteobacteria                         | SEEP-SRB2                             |
| AY542555               | uncultured delta proteobacterium                                      | (1)                    | <i>Desulfobulbus</i>                        | SEEP-SRB3                             |
| AJ535242               | uncultured delta proteobacterium                                      | (1)                    | <i>Desulfobulbus</i>                        | SEEP-SRB4                             |
| AJ704695               | uncultured delta proteobacterium                                      | (1)                    | <i>Desulfobulbus</i>                        | SEEP-SRB4                             |
| AF354162               | uncultured delta proteobacterium                                      | (1)                    | <i>Desulfosarcinales</i>                    | Desulfobacteraceae_3                  |
| AF136008               | <i>Desulfobacterium</i> sp. BSv41                                     | (1)                    | <i>Desulfobacterium</i> sp.                 | Desulfobacterium                      |
| M26632                 | <i>Desulfosarcina variabilis</i>                                      | (1)                    | <i>Desulfosarcina variabilis</i>            | <i>Desulfosarcina variabilis</i>      |
| X83942                 | <i>Bacteroides fragilis</i>                                           | (1)                    | <i>Bacteroides fragilis</i>                 | <i>Bacteroides fragilis</i>           |
| AY280418               | uncultured Bacteroidetes bacterium                                    | (1)                    | CFB                                         | CFB                                   |
| MS8766                 | <i>Cytophaga fermentans</i>                                           | (1)                    | <i>Cytophaga fermentans</i>                 | <i>Cytophaga fermentans</i>           |
| AJ704701               | uncultured Bacteroidetes bacterium                                    | (1)                    | CFB                                         | CFB                                   |
| U01328                 | <i>Helicobacter pylori</i>                                            | (1)                    | <i>Helicobacter pylori</i>                  | <i>Helicobacter pylori</i>            |
| AY211663               | uncultured epsilon proteobacterium                                    | (1)                    | Epsilonproteobacteria                       | Helicobacteraceae_2                   |
| AB013263               | uncultured epsilon proteobacterium                                    | (1)                    | Epsilonproteobacteria                       | Helicobacteraceae_2                   |
| AB205405               | <i>Alviniconcha aff. hesleri</i> gill endosymbiont                    | (1)                    | Epsilonproteobacteria                       | Epsilon_I                             |
| AF449250               | uncultured epsilon proteobacterium                                    | (1)                    | Epsilonproteobacteria                       | Epsilon_I                             |
| AY542194               | uncultured epsilon proteobacterium                                    | (1)                    | Epsilonproteobacteria                       | Epsilon_I                             |
| AB013262               | uncultured epsilon proteobacterium                                    | (1)                    | Epsilonproteobacteria                       | Epsilon_I                             |
| D14500                 | <i>Agrobacterium tumefaciens</i>                                      | (1)                    | <i>Agrobacterium tumefaciens</i>            | <i>Agrobacterium tumefaciens</i>      |
| DQ289905               | uncultured alpha proteobacterium                                      | (1)                    | Alphaproteobacteria                         | Hyphomicrobiaceae                     |
| AY592158               | uncultured bacterium                                                  | (1)                    | Alphaproteobacteria                         | Hyphomicrobiaceae                     |
| AB016721               | <i>Bacillus subtilis</i>                                              | (1)                    | <i>Bacillus subtilis</i>                    | <i>Bacillus subtilis</i>              |
| MS9084                 | <i>Clostridium acidurici</i>                                          | (1)                    | <i>Clostridium acidurici</i>                | <i>Clostridium acidurici</i>          |
| AB117569               | <i>Clostridium hylemonae</i>                                          | (1)                    | <i>Clostridium hylemonae</i>                | <i>Clostridium hylemonae</i>          |
| AF419699               | uncultured bacterium                                                  | (1)                    | GNS                                         | D1_Chloroflexi                        |
| AF424395               | uncultured Chloroflexi bacterium                                      | (1)                    | GNS                                         | D1_Chloroflexi                        |
| AB015271               | uncultured candidate division JS1 bacterium                           | (1)                    | JS1                                         | JS1                                   |
| AB177221               | uncultured bacterium                                                  | (1)                    | JS1                                         | JS1                                   |
| AY592093               | uncultured bacterium                                                  | (1)                    | Actinobacteria                              | Acidimicrobiales                      |
| AY592145               | uncultured bacterium                                                  | (1)                    | Actinobacteria                              | Acidimicrobiales                      |
| AY592135               | uncultured bacterium                                                  | (1)                    | Actinobacteria                              | Gemmati_D4                            |
| AY592136               | uncultured bacterium                                                  | (1)                    | Actinobacteria                              | Gemmati_D4                            |
| L40809                 | <i>Thiomicrospira pelophila</i>                                       | (2)                    | <i>Thiomicrospira pelophila</i>             | <i>Thiomicrospira pelophila</i>       |
| U32940                 | <i>Thiothrix ramosa</i>                                               | (2)                    | <i>Thiothrix ramosa</i>                     | <i>Thiothrix ramosa</i>               |
| U15106                 | hydrothermal vent eubacterium PVB_OTU_6                               | (2)                    | Epsilonproteobacteria II                    | Helicobacteraceae_2                   |
| AF420352               | uncultured proteobacterium                                            | (2)                    | Epsilonproteobacteria II                    | Helicobacteraceae_2                   |
| AY197379               | uncultured proteobacterium                                            | (2)                    | Epsilonproteobacteria II                    | Helicobacteraceae_2                   |
| L40808                 | <i>Sulfurimonas denitrificans</i> DSM 1251                            | (2)                    | <i>Thiomicrospira denitrificans</i>         | <i>Thiomicrospira denitrificans</i>   |
| AF050545               | uncultured eubacterium WCHB1-69                                       | (2)                    | Epsilonproteobacteria I                     | CFB                                   |
| AB013260               | uncultured epsilon proteobacterium                                    | (2)                    | Epsilonproteobacteria I                     | Epsilon_I                             |
| AY197396               | uncultured proteobacterium                                            | (2)                    | Epsilonproteobacteria I                     | Epsilon_I                             |
| AY197410               | uncultured proteobacterium                                            | (2)                    | Epsilonproteobacteria I                     | Epsilon_I                             |
| AF420362               | uncultured proteobacterium                                            | (2)                    | Epsilonproteobacteria I                     | Epsilon_I                             |
| AY197375               | uncultured proteobacterium                                            | (2)                    | Epsilonproteobacteria I                     | Epsilon_I                             |
| AF420344               | uncultured proteobacterium                                            | (2)                    | Epsilonproteobacteria I                     | Epsilon_I                             |
| AY197378               | uncultured proteobacterium                                            | (2)                    | Epsilonproteobacteria I                     | Epsilon_I                             |
| AF154101               | uncultured hydrocarbon seep bacterium GCA014                          | (2)                    | Epsilonproteobacteria I                     | Epsilon_I                             |
| AF029044               | benzene mineralizing consortium clone SB-17                           | (2)                    | Epsilonproteobacteria I                     | Epsilon_I                             |
| AY197380               | uncultured proteobacterium                                            | (2)                    | Epsilonproteobacteria I                     | Epsilon_I                             |
| L35522                 | <i>Alvinella pompejana</i> epibiont                                   | (2)                    | Epsilonproteobacteria                       | Epsilon_I                             |
| X70953                 | <i>Desulfobacula toluolica</i> ToI2                                   | (2)                    | <i>Desulfobacula toluolica</i>              | <i>Desulfobacula toluolica</i>        |
| AJ237606               | <i>Desulfobacula phenolica</i>                                        | (2)                    | <i>Desulfobacterium phenolicum</i>          | <i>Desulfobacterium phenolicum</i>    |
| AY197397               | uncultured bacterium                                                  | (2)                    | Deltaproteobacteria                         | Desulfobacteraceae                    |
| AF181776               | <i>Desulfotignum balticum</i>                                         | (2)                    | <i>Desulfotignum balticum</i>               | <i>Desulfotignum balticum</i>         |
| AJ441315               | <i>Desulfobacter latus</i>                                            | (2)                    | <i>Desulfobacter latus</i>                  | <i>Desulfobacter latus</i>            |
| U12254                 | <i>Desulfobacter vibrioformis</i>                                     | (2)                    | <i>Desulfobacter vibrioformis</i>           | <i>Desulfobacter vibrioformis</i>     |
| AY197376               | uncultured proteobacterium                                            | (2)                    | Deltaproteobacteria                         | Desulfobacteraceae                    |
| AY197402               | uncultured proteobacterium                                            | (2)                    | Deltaproteobacteria                         | Desulfobacteraceae                    |
| AY197413               | uncultured proteobacterium                                            | (2)                    | Deltaproteobacteria                         | Desulfobacteraceae                    |
| AY197389               | uncultured proteobacterium                                            | (2)                    | Deltaproteobacteria                         | Desulfobacteraceae                    |
| AY197382               | uncultured proteobacterium                                            | (2)                    | Deltaproteobacteria                         | Desulfobacteraceae                    |
| U51845                 | <i>Desulfococcus niacini</i>                                          | (2)                    | <i>Desulfobacterium niacini</i>             | <i>Desulfobacterium niacini</i>       |
| M34409                 | <i>Desulfobacterium autotrophicum</i>                                 | (2)                    | <i>Desulfobacterium autotrophicum</i>       | <i>Desulfobacterium autotrophicum</i> |
| U45990                 | <i>Desulfonema limicola</i> str. Jadedusen                            | (2)                    | <i>Desulfonema limicola</i>                 | <i>Desulfonema limicola</i>           |
| M34410                 | <i>Desulfobulbus propionicus</i>                                      | (2)                    | <i>Desulfobulbus propionicus</i>            | <i>Desulfobulbus propionicus</i>      |
| X79412                 | <i>Desulfuromusa bakii</i>                                            | (2)                    | <i>Desulfuromusa bakii</i>                  | <i>Desulfuromusa bakii</i>            |
| AB013269               | uncultured bacterium                                                  | (2)                    | Holophaga / Acidobacterium                  | Acidobacteria                         |
| AY197421               | uncultured bacterium                                                  | (2)                    | Holophaga / Acidobacterium                  | Acidobacteria                         |
| AY197383               | uncultured bacterium                                                  | (2)                    | Cytophaga / Flavobacterium                  | CFB                                   |
| AY197409               | uncultured bacterium                                                  | (2)                    | Cytophaga / Flavobacterium                  | CFB                                   |
| AY197418               | uncultured bacterium                                                  | (2)                    | Cytophaga / Flavobacterium                  | CFB                                   |
| AY197403               | uncultured bacterium                                                  | (2)                    | Cytophaga / Flavobacterium                  | CFB                                   |
| AY197390               | uncultured bacterium                                                  | (2)                    | Cytophaga / Flavobacterium                  | CFB                                   |
| AY197393               | uncultured bacterium                                                  | (2)                    | Cytophaga / Flavobacterium                  | CFB                                   |
| AY197401               | uncultured bacterium                                                  | (2)                    | Cytophaga / Flavobacterium                  | CFB                                   |
| AB015525               | uncultured <i>Cytophaga</i> sp.                                       | (2)                    | Cytophaga / Flavobacterium                  | <i>Cytophaga</i> sp.                  |
| AY197391               | uncultured bacterium                                                  | (2)                    | Cytophaga / Flavobacterium                  | CFB                                   |
| AY197381               | uncultured bacterium                                                  | (2)                    | Cytophaga / Flavobacterium                  | CFB                                   |
| AY197392               | uncultured bacterium                                                  | (2)                    | Cytophaga / Flavobacterium                  | CFB                                   |
| AF196808               | uncultured bacterium                                                  | (2)                    | Cytophaga / Flavobacterium                  | CFB                                   |
| AF068798               | uncultured bacterium VC2.1 Bac22                                      | (2)                    | Cytophaga / Flavobacterium                  | CFB                                   |
| AF029039               | benzene mineralizing consortium clone SB-1                            | (2)                    | Cytophaga / Flavobacterium                  | CFB                                   |
| AY197415               | uncultured bacterium                                                  | (2)                    | Cytophaga / Flavobacterium                  | CFB                                   |
| M31769                 | <i>Chlorobium limicola</i>                                            | (2)                    | <i>Chlorobium limicola</i>                  | <i>Chlorobium limicola</i>            |
| AF001653               | uncultured eubacterium OCS146                                         | (2)                    | SAR 406 Group                               | SAR406                                |
| U34043                 | uncultured SAR406 cluster bacterium                                   | (2)                    | SAR 406 Group                               | SAR406                                |
| AY197420               | uncultured bacterium                                                  | (2)                    | SAR 406 Group                               | SAR406                                |
| AY197423               | uncultured bacterium                                                  | (2)                    | WS3                                         | OP11_D2                               |
| AF423182               | toluene-degrading methanogenic consortium bacterium                   | (2)                    | WS3                                         | OP11_D2                               |
| AF050597               | uncultured eubacterium WCHB1-01                                       | (2)                    | WS6                                         | WS6                                   |
| AY197384               | uncultured bacterium                                                  | (2)                    | WS6                                         | WS6                                   |
| AY197398               | uncultured bacterium                                                  | (2)                    | Unaffiliated                                | PCGroup_D1                            |
| AY197407               | uncultured bacterium                                                  | (2)                    | Unaffiliated                                | PCGroup_D1                            |
| AY197399               | uncultured bacterium                                                  | (2)                    | Unaffiliated                                | PCGroup_D1                            |
| AY197400               | uncultured bacterium                                                  | (2)                    | Unaffiliated                                | PCGroup_D1                            |
| AF19684                | uncultured bacterium                                                  | (2)                    | Unaffiliated                                | PCGroup_D1                            |

|          |                                                                 |     |                                                              |                                           |
|----------|-----------------------------------------------------------------|-----|--------------------------------------------------------------|-------------------------------------------|
| AY197419 | uncultured bacterium                                            | (2) | Unaffiliated                                                 | OD1                                       |
| AF029049 | benzene mineralizing consortium clone SB-34                     | (2) | GNS                                                          | D1_Chloroflexi                            |
| AB015556 | uncultured bacterium                                            | (2) | GNS                                                          | D1_Chloroflexi                            |
| AY197416 | uncultured bacterium                                            | (2) | GNS                                                          | D1_Chloroflexi                            |
| AF154084 | uncultured hydrocarbon seep bacterium BPC110                    | (2) | GNS                                                          | D1_Chloroflexi                            |
| AF027044 | unidentified green non-sulfur bacterium OPB34                   | (2) | GNS                                                          | D1_Chloroflexi                            |
| AY197386 | uncultured bacterium                                            | (2) | Verrucomicrobia                                              | Verruco_D5                                |
| AJ009463 | uncultured bacterium SJA-43                                     | (2) | SJA43                                                        | SJA43_WS1                                 |
| AY197405 | uncultured bacterium                                            | (2) | SJA43                                                        | SJA43_WS1                                 |
| AY197424 | uncultured bacterium                                            | (2) | SJA43                                                        | SJA43_WS1                                 |
| AF419671 | uncultured bacterium                                            | (2) | OP8                                                          | OP8                                       |
| AB013270 | uncultured bacterium                                            | (2) | OP8                                                          | OP8                                       |
| AF419670 | uncultured bacterium                                            | (2) | OP8                                                          | OP8                                       |
| AY197394 | uncultured bacterium                                            | (2) | OP8                                                          | OP8                                       |
| AF419691 | uncultured bacterium                                            | (2) | OP8                                                          | OP8                                       |
| M87055   | wall-less spirochete                                            | (2) | Spirochaetes                                                 | Spirochaetes                              |
| M71239   | <i>Spirochaeta bajacalforniensis</i>                            | (2) | <i>Spirochaeta bajacalforniensis</i>                         | <i>Spirochaeta bajacalforniensis</i>      |
| AY197374 | uncultured bacterium                                            | (2) | Spirochaetes                                                 | Spirochaetes                              |
| AJ009493 | uncultured bacterium SJA-136                                    | (2) | Firmicutes                                                   | Firmicutes                                |
| AY197417 | uncultured bacterium                                            | (2) | Firmicutes                                                   | Firmicutes                                |
| X77837   | <i>Clostridium halophilum</i>                                   | (2) | <i>Clostridium halophilum</i>                                | <i>Clostridium halophilum</i>             |
| Y11570   | <i>Desulfosporosinus orientis</i> DSM 765                       | (2) | <i>Desulfotomaculum orientis</i>                             | <i>Desulfotomaculum orientis</i>          |
| Y11573   | <i>Desulfotomaculum thermoacetoxidans</i>                       | (2) | <i>Desulfotomaculum thermoacetoxidans</i>                    | <i>Desulfotomaculum thermoacetoxidans</i> |
| Y11575   | <i>Desulfotomaculum thermosapovorans</i>                        | (2) | <i>Desulfotomaculum thermosapovorans</i>                     | <i>Desulfotomaculum thermosapovorans</i>  |
| AF029050 | benzene mineralizing consortium clone SB-45                     | (2) | Bacterial group from methane -and hydrocarbon-rich sediments | JS1                                       |
| AY197377 | uncultured bacterium                                            | (2) | Bacterial group from methane -and hydrocarbon-rich sediments | JS1                                       |
| AY197412 | uncultured bacterium                                            | (2) | Bacterial group from methane -and hydrocarbon-rich sediments | JS1                                       |
| AF419693 | uncultured bacterium                                            | (2) | Bacterial group from methane -and hydrocarbon-rich sediments | JS1                                       |
| AF029043 | benzene mineralizing consortium clone SB-15                     | (2) | Bacterial group from methane -and hydrocarbon-rich sediments | JS1                                       |
| AY197414 | uncultured bacterium                                            | (2) | Bacterial group from methane -and hydrocarbon-rich sediments | JS1                                       |
| AY197406 | uncultured bacterium                                            | (2) | Bacterial group from methane -and hydrocarbon-rich sediments | JS1                                       |
| AF419682 | uncultured bacterium                                            | (2) | Bacterial group from methane -and hydrocarbon-rich sediments | JS1                                       |
| AF031479 | <i>Acholeplasma vituli</i>                                      | (2) | <i>Acholeplasma palakii</i>                                  | <i>Acholeplasma palakii</i>               |
| AY197395 | uncultured bacterium                                            | (2) | Mollicutes                                                   | Mollicutes                                |
| AJ006853 | sulfate-reducing bacterium mXy51                                | (3) | <i>Desulfobacterium anilini</i> group                        | Desulfobacterales_2                       |
| AF354145 | uncultured delta proteobacterium                                | (3) | Eel1                                                         | Desulfobacterales_2                       |
| AJ535238 | uncultured delta proteobacterium                                | (3) | Desulfobulbaceae                                             | Desulfobulbaceae_1                        |
| AJ575987 | uncultured delta proteobacterium                                | (3) | Desulfobulbaceae                                             | Desulfobulbaceae_1                        |
| AY771958 | uncultured delta proteobacterium                                | (3) | Desulfobulbaceae                                             | Desulfobulbaceae                          |
| AJ441235 | uncultured delta proteobacterium                                | (3) | Deltaproteobacteria                                          | Desulfobacterales_1                       |
| AB021367 | Marinobacterium stanieri                                        | (3) | <i>Pseudomonas stanieri</i>                                  | <i>Pseudomonas stanieri</i>               |
| AJ241003 | uncultured Holophaga/Acidobacterium Sva0725                     | (3) | Acidobacteria                                                | Acidobacteria                             |
| AY225643 | uncultured Acidobacteriaceae bacterium                          | (3) | Acidobacteria                                                | Acidobacteria                             |
| U41563   | <i>Geothrix fermentans</i>                                      | (3) | <i>Geothrix fermentans</i>                                   | <i>Geothrix fermentans</i>                |
| Y11566   | <i>Desulfotomaculum acetoxidans</i> DSM 771                     | (3) | <i>Desulfotomaculum acetoxidans</i>                          | <i>Desulfotomaculum acetoxidans</i>       |
| AY547836 | uncultured bacterium                                            | (3) | Hypersalin Group I                                           | Unaffiliated_D3                           |
| AF029050 | benzene mineralizing consortium clone SB-45                     | (3) | JS1                                                          | JS1                                       |
| AY053496 | uncultured candidate division JS1 bacterium                     | (3) | JS1                                                          | JS1                                       |
| AF029076 | uncultured <i>Pirellula</i> clone SH12                          | (3) | Planctomycetales                                             | Planctomycetales                          |
| AJ241009 | uncultured Planctomycetes Sva0503                               | (3) | Planctomycetales                                             | WPS1                                      |
| AY254883 | Candidatus <i>Scalindua brodae</i>                              | (3) | <i>C. Scalindua brodae</i>                                   | <i>C. Scalindua brodae</i>                |
| AY254882 | Candidatus <i>Scalindua wagneri</i>                             | (3) | <i>C. Scalindua wagneri</i>                                  | <i>C. Scalindua wagneri</i>               |
| AJ704718 | uncultured Aminicenantes bacterium                              | (3) | OP8                                                          | OP8                                       |
| AF027067 | candidate division OP8 clone OPB5                               | (3) | OP8                                                          | OP8                                       |
| AF079507 | <i>Denitrobacterium detoxificans</i>                            | (3) | <i>Denitrobacterium detoxificans</i>                         | <i>Denitrobacterium detoxificans</i>      |
| AB234236 | uncultured bacterium                                            | (3) | Actinobacteria                                               | Coriobacteriales                          |
| AB074931 | uncultured actinobacterium                                      | (3) | Actinobacteria                                               | Coriobacteriales                          |
| DQ009431 | uncultured marine bacterium                                     | (3) | Actinobacteria                                               | Acidimicrobiales                          |
| AY093455 | uncultured bacterium                                            | (3) | Actinobacteria                                               | Acidimicrobiales                          |
| AJ241005 | uncultured High G+C Gram-positive bacterium Sva0996             | (3) | Actinobacteria                                               | Acidimicrobiales                          |
| X96726   | <i>Thermodesulfobivria islandicus</i>                           | (3) | <i>Thermodesulfobivria islandicus</i>                        | <i>Thermodesulfobivria islandicus</i>     |
| AY869676 | uncultured bacterium                                            | (3) | Chloroflexi                                                  | D2_Chloroflexi                            |
| AJ308501 | <i>Chloroflexus aurantiacus</i>                                 | (3) | <i>Chloroflexus aurantiacus</i>                              | <i>Chloroflexus aurantiacus</i>           |
| AJ937689 | uncultured bacterium                                            | (3) | Hydrocarbon-associated Group                                 | HAG_OP1                                   |
| AY053495 | uncultured bacterium                                            | (3) | Hydrocarbon-associated Group                                 | HAG_OP1                                   |
| AY226324 | uncultured KB1 group bacterium                                  | (3) | KB1                                                          | KB1                                       |
| DQ768117 | <i>Myxococcus fulvus</i>                                        | (4) | <i>Myxococcus fulvus</i>                                     | <i>Myxococcus fulvus</i>                  |
| AB015244 | uncultured delta proteobacterium                                | (4) | <i>Desulfobacterium sp.</i>                                  | Desulfobacterium                          |
| AF418177 | <i>Desulfobacterium autotrophicum</i>                           | (4) | <i>Desulfobacterium autotrophicum</i>                        | <i>Desulfobacterium autotrophicum</i>     |
| AF354164 | uncultured delta proteobacterium                                | (4) | SEEP-SRB1                                                    | SEEP-SRB1a                                |
| AJ704681 | uncultured delta proteobacterium                                | (4) | DSS                                                          | Desulfobacteraceae                        |
| AJ237603 | <i>Desulfosarcina cetonica</i>                                  | (4) | <i>Desulfobacterium cetonicum</i>                            | Desulfosarcina                            |
| AJ237607 | <i>Desulfobacterium indolicum</i>                               | (4) | <i>Desulfobacterium indolicum</i>                            | <i>Desulfobacterium indolicum</i>         |
| DQ133911 | uncultured bacterium                                            | (4) | DSS                                                          | Desulfobacteraceae                        |
| AY771942 | uncultured delta proteobacterium                                | (4) | Desulfobacteraceae                                           | SEEP-SRB1c                                |
| AJ237601 | <i>Desulfobacterium anilini</i>                                 | (4) | <i>Desulfobacterium anilini</i>                              | <i>Desulfobacterium anilini</i>           |
| AJ704686 | uncultured delta proteobacterium                                | (4) | <i>D. anilini</i> group                                      | Desulfobacterales_2                       |
| AJ237602 | <i>Desulfobacterium catecholicum</i>                            | (4) | <i>Desulfobacterium catecholicum</i>                         | Desulfobulbaceae_1                        |
| AY771966 | uncultured delta proteobacterium                                | (4) | Desulfobulbaceae                                             | Desulfobulbaceae_1                        |
| AY771932 | delta proteobacterium Lack10                                    | (4) | <i>Desulfocapsa sp.</i>                                      | Desulfobulbaceae_1                        |
| DQ521816 | uncultured bacterium                                            | (4) | <i>Desulfocapsa sp.</i>                                      | Desulfobulbaceae_1                        |
| EU265788 | uncultured delta proteobacterium                                | (4) | <i>Desulfocapsa sp.</i>                                      | Desulfobulbaceae_1                        |
| DQ521786 | uncultured bacterium                                            | (4) | Eel2                                                         | SEEP-SRB2                                 |
| AJ535254 | uncultured delta proteobacterium                                | (4) | Eel2                                                         | SEEP-SRB2                                 |
| AF354149 | uncultured delta proteobacterium                                | (4) | Eel2                                                         | SEEP-SRB2                                 |
| DQ447183 | <i>Desulfobivria paquesii</i>                                   | (4) | <i>Desulfobivria paquesii</i>                                | <i>Desulfobivria paquesii</i>             |
| X82874   | <i>Syntrophobacter fumaroxidans</i> MPOB                        | (4) | <i>Syntrophobacter fumaroxidans</i>                          | <i>Syntrophobacter fumaroxidans</i>       |
| AF050578 | uncultured eubacterium WCHA1-48                                 | (4) | WS1                                                          | SJA43_WS1                                 |
| AB177145 | uncultured bacterium                                            | (4) | WS1                                                          | SJA43_WS1                                 |
| AY257181 | Candidatus <i>Scalindua sorokinii</i>                           | (4) | <i>C. Scalindua sorokinii</i>                                | <i>C. Scalindua sorokinii</i>             |
| EF208657 | uncultured bacterium                                            | (4) | Planctomycetes / Verrucomicrobia                             | Planctomycetes                            |
| AY222315 | uncultured Verrucomicrobia bacterium                            | (4) | Planctomycetes / Verrucomicrobia                             | Verruco_D5                                |
| AJ535231 | uncultured bacterium                                            | (4) | Hypersaline group II                                         | Unaffiliated_D2                           |
| DQ521801 | uncultured bacterium                                            | (4) | Hypersaline group II                                         | WS3/HG2                                   |
| EF687368 | uncultured bacterium                                            | (4) | Hypersaline group II                                         | WS3/HG2                                   |
| AF385537 | <i>Holophaga sp.</i> oral clone CA002                           | (4) | <i>Holophaga sp.</i>                                         | <i>Holophaga sp.</i>                      |
| AY225646 | uncultured Acidobacteriaceae bacterium                          | (4) | Holophaga / Acidobacteria                                    | Acidobacteria                             |
| DQ017940 | uncultured bacterium                                            | (4) | Holophaga / Acidobacteria                                    | D6_Acidobacteria                          |
| AY114331 | uncultured candidate division BRC1 bacterium                    | (4) | Unclassified                                                 | BRC1                                      |
| AB015247 | uncultured alpha proteobacterium                                | (4) | Rhodobacteraceae                                             | Rhodobacterales                           |
| D16421   | <i>Rhodobacter veldkampii</i> DSM 11550                         | (4) | Rhodobacteraceae                                             | Rhodobacterales                           |
| M59063   | <i>Roseobacter denitrificans</i> OCh 114                        | (4) | <i>Rhodobacter veldkampii</i>                                | <i>Rhodobacter veldkampii</i>             |
| AY845233 | uncultured bacterium                                            | (4) | <i>Roseobacter sp.</i>                                       | <i>Roseobacter sp.</i>                    |
| EU491409 | uncultured bacterium                                            | (4) | Alphaproteobacteria                                          | Alphaproteobacteria                       |
| AB036709 | <i>Bathymodiulus septemdiemum</i> thioautotrophic gill symbiont | (4) | Clam Gill Symbiont I                                         | CGS1                                      |
| DQ351743 | uncultured gamma proteobacterium                                | (4) | Clam Gill Symbiont I                                         | Gammaproteobacteria                       |
| AB188770 | <i>Maarthyas hadalis</i> gill thioautotrophic symbiont II       | (4) | <i>M. hadalis</i> gill symbiont II                           | MHGSII                                    |
| AB042414 | <i>Maarthyas hadalis</i> gill thioautotrophic symbiont II       | (4) | <i>M. hadalis</i> gill symbiont II                           | MHGSII                                    |
| DQ490023 | uncultured bacterium                                            | (4) | <i>M. hadalis</i> gill symbiont II                           | MHGSII                                    |
| AB166731 | <i>Thiomicrospira thermophila</i>                               | (4) | <i>Thiomicrospira thermophila</i>                            | <i>Thiomicrospira thermophila</i>         |
| AF013975 | <i>Thiomicrospira chilensis</i>                                 | (4) | <i>Thiomicrospira sp.</i>                                    | <i>Thiomicrospira sp.</i>                 |
| AF304197 | <i>Methylobacter marinus</i>                                    | (4) | <i>Methylobacter marinus</i>                                 | <i>Methylobacter marinus</i>              |
| AF304196 | <i>Methylamonas methanica</i>                                   | (4) | <i>Methylamonas methanica</i>                                | <i>Methylamonas methanica</i>             |
| M90415   | <i>Salemya velum</i> gill symbiont                              | (4) | Clam Gill Symbiont II                                        | CGS2_a                                    |
| AB252438 | uncultured bacterium                                            | (4) | Clam Gill Symbiont II                                        | CGS2_a                                    |
| AF170423 | sulfur-oxidizing bacterium OAI12                                | (4) | Free-living S oxidizer                                       | Gammaproteobacteria                       |
| AY225633 | uncultured gamma proteobacterium                                | (4) | Gammaproteobacteria                                          | Gammaproteobacteria                       |

|          |                                                     |     |                                       |                                       |
|----------|-----------------------------------------------------|-----|---------------------------------------|---------------------------------------|
| EU491163 | uncultured bacterium                                | (4) | Gamma proteobacteria                  | Gamma_2                               |
| DQ513032 | uncultured bacterium                                | (4) | Gamma proteobacteria                  | Gamma proteobacteria                  |
| AJ240987 | uncultured gamma proteobacterium Sva0091            | (4) | Gamma proteobacteria                  | Gamma_1                               |
| L40998   | <i>Thioplaca ingrica</i>                            | (4) | <i>Thioplaca ingrica</i>              | <i>Thioplaca ingrica</i>              |
| AF110275 | <i>Beggiatoa</i> sp. AASA                           | (4) | <i>Beggiatoa</i> sp.                  | Beggiatoa                             |
| D12661   | <i>Cytophaga fermentans</i> DSM 9555                | (4) | <i>Cytophaga fermentans</i>           | <i>Cytophaga fermentans</i>           |
| AJ535258 | uncultured Cytophagales bacterium                   | (4) | Bacteroidetes                         | CFB                                   |
| AF419690 | uncultured bacterium                                | (4) | Bacteroidetes                         | CFB                                   |
| AB067647 | <i>Caldilinea aerophila</i> DSM 14535 = NBRC 104270 | (4) | <i>Caldilinea aerophila</i>           | <i>Caldilinea aerophila</i>           |
| AB046413 | <i>Anaerolinea thermophila</i>                      | (4) | <i>Anaerolinea thermophila</i>        | <i>Anaerolinea thermophila</i>        |
| AY92350  | uncultured bacterium                                | (4) | Chloroflexi                           | D1_Chloroflexi                        |
| AB177188 | uncultured bacterium                                | (4) | Chloroflexi                           | D2_Chloroflexi                        |
| DQ223076 | uncultured bacterium                                | (4) | Chloroflexi                           | D2_Chloroflexi                        |
| AF393781 | <i>Dehalobium chloroercozia</i> DF-1                | (4) | <i>Dehalobium chloroercozia</i>       | <i>Dehalobium chloroercozia</i>       |
| DQ330175 | uncultured Chloroflexi bacterium                    | (4) | Chloroflexi                           | D2_Chloroflexi                        |
| AY92678  | uncultured bacterium                                | (4) | Chloroflexi                           | Chloroflexi                           |
| EU797471 | uncultured bacterium                                | (5) | Bacteroidetes                         | CFB                                   |
| FM16073  | uncultured bacterium                                | (5) | Bacteroidetes                         | CFB                                   |
| AY216454 | uncultured bacterium                                | (5) | Bacteroidetes                         | CFB                                   |
| FJ544918 | <i>Flavobacterium</i> sp. KOPRI 25160               | (5) | <i>Flavobacterium</i> sp.             | CFB                                   |
| EU101178 | uncultured bacterium                                | (5) | Chlorobi                              | Chlorobi                              |
| EU644478 | uncultured <i>Fusobacterium</i> sp.                 | (5) | <i>Fusobacterium</i> sp.              | Fusobacterium                         |
| DQ811940 | uncultured Microgenomates bacterium                 | (5) | OP11                                  | PCGroup_D3                            |
| EU925868 | uncultured bacterium                                | (5) | WS2                                   | WS2                                   |
| EU488103 | uncultured bacterium                                | (5) | Chloroflexi                           | Chloroflexi                           |
| AY869675 | uncultured bacterium                                | (5) | Chloroflexi                           | D2_Chloroflexi                        |
| FJ455882 | uncultured bacterium                                | (5) | Chloroflexi                           | D2_Chloroflexi                        |
| AY165308 | <i>Dehalococcoides</i> sp. BAV1                     | (5) | <i>Dehalococcoides</i> sp.            | <i>Dehalococcoides</i> sp.            |
| EF208705 | uncultured bacterium                                | (5) | Chloroflexi                           | D1_Chloroflexi                        |
| EF208701 | uncultured bacterium                                | (5) | Chloroflexi                           | D1_Chloroflexi                        |
| EF208698 | uncultured bacterium                                | (5) | Chloroflexi                           | D1_Chloroflexi                        |
| EU617894 | uncultured bacterium                                | (5) | Chloroflexi                           | D1_Chloroflexi                        |
| AM745142 | uncultured bacterium                                | (5) | Chloroflexi                           | D1_Chloroflexi                        |
| DQ004670 | uncultured bacterium                                | (5) | Unaffiliated                          | Firmicutes                            |
| EU266857 | uncultured Thermoanaerobacteraceae bacterium        | (5) | TG-1                                  | TG1                                   |
| EU290738 | uncultured bacterium                                | (5) | OP8                                   | OP8                                   |
| EU181480 | uncultured bacterium                                | (5) | OP8                                   | OP8                                   |
| FM165244 | uncultured bacterium                                | (5) | OP8                                   | OP8                                   |
| FJ455891 | uncultured bacterium                                | (5) | JS1                                   | JS1                                   |
| AM745209 | uncultured candidate division JS1 bacterium         | (5) | JS1                                   | JS1                                   |
| EU181470 | uncultured bacterium                                | (5) | JS1                                   | JS1                                   |
| DQ256327 | uncultured bacterium                                | (5) | Firmicutes                            | Firmicutes                            |
| AM745203 | uncultured Firmicutes bacterium                     | (5) | Firmicutes                            | Firmicutes                            |
| AY574991 | <i>Catabacter hongkongensis</i>                     | (5) | <i>Catabacter hongkongensis</i>       | <i>Catabacter_hongkongensis</i>       |
| FJ264756 | uncultured bacterium                                | (5) | Firmicutes                            | Firmicutes                            |
| EU557007 | uncultured bacterium                                | (5) | Firmicutes                            | Bacillales                            |
| AM085483 | uncultured bacterium                                | (5) | Firmicutes                            | Bacillales                            |
| EU071516 | uncultured <i>Gemella</i> sp.                       | (5) | Firmicutes                            | <i>Gemella</i> sp.                    |
| AJ535232 | uncultured bacterium                                | (5) | Unaffiliated                          | Unaffiliated_D2                       |
| DQ004672 | uncultured bacterium                                | (5) | Unaffiliated                          | Spirochaetes                          |
| EF125446 | uncultured bacterium                                | (5) | Planctomycetes                        | WPS1                                  |
| EU734941 | uncultured bacterium                                | (5) | Planctomycetes                        | Planctomycetes                        |
| EU287152 | uncultured bacterium                                | (5) | Planctomycetes                        | Planctomycetes                        |
| EU491166 | uncultured bacterium                                | (5) | Planctomycetes                        | Planctomycetales                      |
| AB476212 | uncultured bacterium                                | (5) | Planctomycetes                        | Planctomycetales                      |
| FJ455880 | uncultured bacterium                                | (5) | Planctomycetes                        | Planctomycetales                      |
| FJ205382 | uncultured actinobacterium                          | (5) | Actinobacteria                        | Gemmati_D3                            |
| EU266850 | uncultured actinobacterium                          | (5) | Actinobacteria                        | Coriobacteriales                      |
| AY457075 | <i>Mycobacterium mucogenicum</i>                    | (5) | <i>Mycobacterium mucogenicum</i>      | <i>Mycobacterium mucogenicum</i>      |
| DQ394984 | uncultured bacterium                                | (5) | Actinobacteria                        | Acidimicrobiales                      |
| EU735028 | uncultured bacterium                                | (5) | Actinobacteria                        | Acidimicrobiales                      |
| FJ545448 | uncultured bacterium                                | (5) | Actinobacteria                        | Acidimicrobiales                      |
| EU488483 | uncultured bacterium                                | (5) | Deferribacteres                       | Caldithrix                            |
| EU101251 | uncultured bacterium                                | (5) | Deferribacteres                       | Caldithrix                            |
| DQ811936 | uncultured Deferribacteres bacterium                | (5) | Deferribacteres                       | Caldithrix                            |
| DQ499291 | uncultured bacterium                                | (5) | WS3                                   | Unaffiliated                          |
| EU048666 | uncultured bacterium                                | (5) | WS3                                   | Unaffiliated                          |
| EU487957 | uncultured bacterium                                | (5) | WS3                                   | WS3/HG2                               |
| EU286999 | uncultured bacterium                                | (5) | WS3                                   | WS3/HG2                               |
| DQ811950 | uncultured bacterium                                | (5) | WS3                                   | WS3/HG2                               |
| AM745159 | uncultured bacterium                                | (5) | WS3                                   | WS3/HG2                               |
| EU246254 | uncultured organism                                 | (5) | Acidobacteria                         | Acidobacteria                         |
| EF687475 | uncultured bacterium                                | (5) | Acidobacteria                         | Acidobacteria                         |
| AM040134 | uncultured Acidobacteriaceae bacterium              | (5) | Acidobacteria                         | Acidobacteria                         |
| EU734999 | uncultured bacterium                                | (5) | Acidobacteria                         | Acidobacteria                         |
| EU925866 | uncultured bacterium                                | (5) | Acidobacteria                         | Acidobacteria                         |
| AM712325 | uncultured Acidobacteria bacterium                  | (5) | Acidobacteria                         | Acidobacteria                         |
| EU622295 | uncultured bacterium                                | (5) | Deltaproteobacteria                   | SEEP-SRB1a                            |
| AF354164 | uncultured delta proteobacterium                    | (5) | Deltaproteobacteria                   | SEEP-SRB1a                            |
| FJ264783 | uncultured bacterium                                | (5) | Deltaproteobacteria                   | Desulfobacteraceae_1                  |
| FM165265 | uncultured bacterium                                | (5) | Deltaproteobacteria                   | SEEP-SRB1e                            |
| EU925915 | uncultured bacterium                                | (5) | Deltaproteobacteria                   | Desulfobacteraceae                    |
| DQ154844 | uncultured bacterium                                | (5) | Deltaproteobacteria                   | Desulfobacteraceae                    |
| DQ826724 | <i>Desulfatiferula olenfinivorans</i>               | (5) | <i>Desulfatiferula olenfinivorans</i> | <i>Desulfatiferula olenfinivorans</i> |
| AJ620497 | <i>Olavius algarvensis</i> Delta 4 endosymbiont     | (5) | Deltaproteobacteria                   | Desulfobacteraceae                    |
| FM179879 | uncultured bacterium                                | (5) | Deltaproteobacteria                   | Gamma proteobacteria                  |
| AY851292 | <i>Algorimarina butyrica</i>                        | (5) | <i>Algorimarina butyrica</i>          | <i>Algorimarina butyrica</i>          |
| EU632291 | uncultured bacterium                                | (5) | Deltaproteobacteria                   | Desulfobacteraceae_3                  |
| AY344393 | uncultured bacterium                                | (5) | Deltaproteobacteria                   | Desulfobacterales_2                   |
| EU622296 | uncultured bacterium                                | (5) | Deltaproteobacteria                   | Desulfobacterales_2                   |
| FM165234 | uncultured bacterium                                | (5) | Deltaproteobacteria                   | Deltaproteobacteria                   |
| AF420340 | uncultured proteobacterium                          | (5) | Deltaproteobacteria                   | Desulfobacterales_1                   |
| FJ264661 | uncultured bacterium                                | (5) | Deltaproteobacteria                   | Desulfobulbaceae                      |
| DQ004674 | uncultured bacterium                                | (5) | Deltaproteobacteria                   | Desulfobulbaceae                      |
| FJ264787 | uncultured bacterium                                | (5) | Deltaproteobacteria                   | Desulfobulbaceae                      |
| AB252437 | uncultured bacterium                                | (5) | Deltaproteobacteria                   | Desulfobulbaceae                      |
| EU016430 | uncultured Desulfobulbaceae bacterium               | (5) | Deltaproteobacteria                   | Desulfobulbaceae                      |
| AY92401  | uncultured bacterium                                | (5) | Deltaproteobacteria                   | Desulfobulbaceae                      |
| FJ264573 | uncultured bacterium                                | (5) | Deltaproteobacteria                   | SEEP-SRB4                             |
| AM745165 | uncultured delta proteobacterium                    | (5) | Deltaproteobacteria                   | Desulfobulbaceae_1                    |
| FJ264671 | uncultured bacterium                                | (5) | Deltaproteobacteria                   | Desulfobulbaceae_1                    |
| AF084855 | <i>Bdellovibrio marinus</i>                         | (5) | <i>Bdellovibrio</i> sp.               | <i>Bdellovibrio</i> sp.               |
| AJ704676 | uncultured delta proteobacterium                    | (5) | Deltaproteobacteria                   | Bdellovibrionales                     |
| EU617741 | uncultured bacterium                                | (5) | Deltaproteobacteria                   | Nitrospiraceae                        |
| FJ024329 | uncultured delta proteobacterium                    | (5) | Deltaproteobacteria                   | Nitrospiraceae                        |
| FJ264777 | uncultured bacterium                                | (5) | Deltaproteobacteria                   | Unaffiliated_D1                       |
| EU283371 | uncultured Firmicutes bacterium                     | (5) | Deltaproteobacteria                   | Unaffiliated                          |
| FJ205191 | uncultured delta proteobacterium                    | (5) | Deltaproteobacteria                   | Unaffiliated_D4                       |
| EF125442 | uncultured bacterium                                | (5) | Deltaproteobacteria                   | Mycococcales                          |
| EF108312 | <i>Haliangium ochraceum</i>                         | (5) | <i>Haliangium ochraceum</i>           | <i>Haliangium ochraceum</i>           |
| EU617833 | uncultured bacterium                                | (5) | Deltaproteobacteria                   | Mycococcales                          |
| FJ184338 | uncultured soil bacterium                           | (5) | Betaproteobacteria                    | <i>Achromobacter</i> Group            |
| AF439314 | <i>Achromobacter xylosoxidans</i>                   | (5) | <i>Achromobacter xylosoxidans</i>     | <i>Achromobacter xylosoxidans</i>     |
| FJ437813 | uncultured bacterium                                | (5) | Betaproteobacteria                    | Betaproteobacteria                    |
| AJ318524 | <i>Rhodovibrio sodomensis</i>                       | (5) | <i>Rhodovibrio sodomensis</i>         | <i>Rhodovibrio sodomensis</i>         |
| EF575084 | uncultured bacterium                                | (5) | Alphaproteobacteria                   | Alphaproteobacteria                   |
| U87779   | <i>Afipia</i> genosp. 9                             | (5) | Alphaproteobacteria                   | Rhizobiales                           |

|           |                                         |     |                                |                               |
|-----------|-----------------------------------------|-----|--------------------------------|-------------------------------|
| AY364020  | <i>Methylobacterium goeisingense</i>    | (5) | Alphaproteobacteria            | Rhizobiales                   |
| EU881315  | uncultured bacterium                    | (5) | Alphaproteobacteria            | Alphaproteobacteria           |
| FJ205181  | uncultured alpha proteobacterium        | (5) | Alphaproteobacteria            | Alphaproteobacteria           |
| DQ2270644 | uncultured bacterium                    | (5) | Alphaproteobacteria            | Rhodobacterales               |
| FJ196064  | <i>Thalassobius</i> sp. Z56-18          | (5) | <i>Thalassobius</i> sp.        | <i>Thalassobius</i> sp.       |
| EU373863  | uncultured alpha proteobacterium        | (5) | Alphaproteobacteria            | Rhodobacterales               |
| DQ832646  | uncultured bacterium                    | (5) | Alphaproteobacteria            | Rhodobacterales               |
| AF367487  | uncultured epsilon proteobacterium      | (5) | Epsilonproteobacteria          | PCGroup_D1                    |
| AB015518  | unidentified proteobacterium            | (5) | Epsilonproteobacteria          | PCGroup_D1                    |
| EU101234  | uncultured bacterium                    | (5) | Epsilonproteobacteria          | Campylobacteraceae_2          |
| DQ234177  | uncultured Campylobacteraceae bacterium | (5) | Epsilonproteobacteria          | Campylobacteraceae_2          |
| FJ264679  | uncultured bacterium                    | (5) | Epsilonproteobacteria          | Epsilon_1                     |
| DQ071101  | uncultured marine bacterium             | (5) | Epsilonproteobacteria          | Helicobacteraceae_2           |
| EU487983  | uncultured bacterium                    | (5) | Epsilonproteobacteria          | Helicobacteraceae_2           |
| EU487981  | uncultured bacterium                    | (5) | Epsilonproteobacteria          | Helicobacteraceae_2           |
| FJ205282  | uncultured gamma proteobacterium        | (5) | Gammaproteobacteria            | Gammaproteobacteria           |
| FJ264668  | uncultured bacterium                    | (5) | Gammaproteobacteria            | Gammaproteobacteria           |
| AM882526  | uncultured gamma proteobacterium        | (5) | Gammaproteobacteria            | Gammaproteobacteria           |
| AB015250  | uncultured gamma proteobacterium        | (5) | Gammaproteobacteria            | Gammaproteobacteria           |
| AM040128  | uncultured gamma proteobacterium        | (5) | Gammaproteobacteria            | Gammaproteobacteria           |
| DQ228657  | uncultured bacterium                    | (5) | Gammaproteobacteria            | Gammaproteobacteria           |
| X87277    | <i>Leucothrix mucor</i> DSM 2157        | (5) | <i>Leucothrix mucor</i>        | <i>Leucothrix mucor</i>       |
| EU555124  | uncultured bacterium                    | (5) | Gammaproteobacteria            | Leucothrix_Group              |
| EU265784  | uncultured gamma proteobacterium        | (5) | Gammaproteobacteria            | Leucothrix_Group              |
| AM882525  | uncultured gamma proteobacterium        | (5) | Gammaproteobacteria            | Methylococcales               |
| DQ270617  | uncultured bacterium                    | (5) | Gammaproteobacteria            | Methylococcales               |
| DQ270612  | uncultured bacterium                    | (5) | Gammaproteobacteria            | Methylococcales               |
| DQ270629  | uncultured bacterium                    | (5) | Gammaproteobacteria            | Methylococcales               |
| AF016981  | <i>Methylobacter</i> sp. BB5.1          | (5) | Gammaproteobacteria            | Methylobacter                 |
| FJ264669  | uncultured bacterium                    | (5) | Gammaproteobacteria            | MHGSII                        |
| AY197388  | uncultured proteobacterium              | (5) | Gammaproteobacteria            | MHGSII                        |
| DQ394903  | uncultured proteobacterium              | (5) | Gammaproteobacteria            | CGS2_b                        |
| AF420355  | uncultured proteobacterium              | (5) | Gammaproteobacteria            | CGS2_b                        |
| EU617749  | uncultured bacterium                    | (5) | Gammaproteobacteria            | Gammaproteobacteria           |
| AF420353  | uncultured proteobacterium              | (5) | Gammaproteobacteria            | CGS2_a                        |
| EU652540  | uncultured bacterium                    | (5) | Gammaproteobacteria            | Gammaproteobacteria           |
| EU491143  | uncultured bacterium                    | (5) | Gammaproteobacteria            | Gammaproteobacteria           |
| AB294933  | uncultured gamma proteobacterium        | (5) | Gammaproteobacteria            | Gammaproteobacteria           |
| EU287104  | uncultured bacterium                    | (5) | Gammaproteobacteria            | Gammaproteobacteria           |
| EU925855  | uncultured bacterium                    | (5) | Gammaproteobacteria            | Gammaproteobacteria           |
| EU734923  | uncultured bacterium                    | (5) | Gammaproteobacteria            | Gamma_1                       |
| FJ416087  | uncultured bacterium                    | (5) | Gammaproteobacteria            | Gamma_1                       |
| FJ264563  | uncultured bacterium                    | (5) | Gammaproteobacteria            | Gamma_1                       |
| EU491419  | uncultured bacterium                    | (5) | Gammaproteobacteria            | Gammaproteobacteria           |
| FMI19879  | uncultured bacterium                    | (5) | Gammaproteobacteria            | Gammaproteobacteria           |
| EU491101  | uncultured bacterium                    | (5) | Gammaproteobacteria            | Gammaproteobacteria           |
| EU617768  | uncultured bacterium                    | (5) | Gammaproteobacteria            | Gammaproteobacteria           |
| EU287137  | uncultured bacterium                    | (5) | Gammaproteobacteria            | Gammaproteobacteria           |
| AB189342  | uncultured gamma proteobacterium        | (5) | Gammaproteobacteria            | Gamma_2                       |
| EU491555  | uncultured bacterium                    | (5) | Gammaproteobacteria            | Gamma_2                       |
| EU491318  | uncultured bacterium                    | (5) | Gammaproteobacteria            | Gamma_2                       |
| EU287229  | uncultured bacterium                    | (5) | Gammaproteobacteria            | Gamma_2                       |
| FJ264571  | uncultured bacterium                    | (5) | Gammaproteobacteria            | Gamma_2                       |
| FJ264567  | uncultured bacterium                    | (5) | Gammaproteobacteria            | Gamma_2                       |
| EU530456  | uncultured <i>Shigella</i> sp.          | (5) | <i>Shigella</i> sp.            | <i>Shigella</i> sp.           |
| EU914257  | <i>Serratia nematodiphila</i>           | (5) | <i>Serratia nematodiphila</i>  | <i>Serratia nematodiphila</i> |
| AY758371  | uncultured bacterium                    | (5) | Gammaproteobacteria            | Pseudomonadales_1             |
| D84002    | <i>Pseudomonas luteola</i>              | (5) | <i>Pseudomonas luteola</i>     | <i>Pseudomonas luteola</i>    |
| DQ911549  | <i>Acinetobacter johnsonii</i>          | (5) | <i>Acinetobacter johnsonii</i> | <i>Acinetobacter</i>          |
| FJ192980  | uncultured <i>Acinetobacter</i> sp.     | (5) | <i>Acinetobacter</i> sp.       | <i>Acinetobacter</i>          |
| AY592229  | uncultured bacterium                    | (6) | SEEP-SRB1c                     | SEEP-SRB1c                    |
| AF354144  | uncultured delta proteobacterium        | (6) | SEEP-SRB1c                     | Desulfobacterales_2           |
| EU179164  | uncultured bacterium                    | (6) | SEEP-SRB1c                     | Desulfobacterales_2           |
| EU048629  | uncultured bacterium                    | (6) | SEEP-SRB1c                     | SEEP-SRB1c                    |
| AB177130  | uncultured bacterium                    | (6) | SEEP-SRB1c                     | SEEP-SRB1c                    |
| EU181464  | uncultured bacterium                    | (6) | SEEP-SRB1c                     | SEEP-SRB1c                    |
| EU124392  | uncultured delta proteobacterium        | (6) | SEEP-SRB1c                     | SEEP-SRB1c                    |
| DQ811835  | uncultured delta proteobacterium        | (6) | SEEP-SRB1c                     | SEEP-SRB1c                    |
| DQ330998  | uncultured proteobacterium              | (6) | SEEP-SRB1c                     | SEEP-SRB1c                    |
| DQ109912  | uncultured delta proteobacterium        | (6) | SEEP-SRB1c                     | SEEP-SRB1c                    |
| EU179182  | uncultured bacterium                    | (6) | SEEP-SRB1e                     | SEEP-SRB1e                    |
| AF354163  | uncultured delta proteobacterium        | (6) | SEEP-SRB1e                     | SEEP-SRB1e                    |
| AM040136  | uncultured delta proteobacterium        | (6) | SEEP-SRB1e                     | SEEP-SRB1e                    |
| FMI19872  | uncultured delta proteobacterium        | (6) | SEEP-SRB1e                     | SEEP-SRB1e                    |
| FMI19902  | uncultured delta proteobacterium        | (6) | SEEP-SRB1e                     | SEEP-SRB1e                    |
| FN550082  | uncultured bacterium                    | (6) | SEEP-SRB1e                     | SEEP-SRB1e                    |
| EU124394  | uncultured delta proteobacterium        | (6) | SEEP-SRB1e                     | SEEP-SRB1e                    |
| AY592894  | uncultured bacterium                    | (6) | SEEP-SRB1d                     | Desulfobacteraceae            |
| DQ811820  | uncultured delta proteobacterium        | (6) | SEEP-SRB1d                     | SEEP-SRB1d                    |
| DQ351775  | uncultured delta proteobacterium        | (6) | SEEP-SRB1d                     | SEEP-SRB1d                    |
| AY771936  | uncultured delta proteobacterium        | (6) | SEEP-SRB1d                     | SEEP-SRB1d                    |
| EF061950  | uncultured delta proteobacterium        | (6) | SEEP-SRB1d                     | SEEP-SRB1d                    |
| DQ521790  | uncultured bacterium                    | (6) | SEEP-SRB1d                     | SEEP-SRB1d                    |
| AJ704677  | uncultured delta proteobacterium        | (6) | SEEP-SRB1d                     | SEEP-SRB1d                    |
| AY592342  | uncultured bacterium                    | (6) | SEEP-SRB1d                     | SEEP-SRB1d                    |
| AM745215  | uncultured delta proteobacterium        | (6) | SEEP-SRB1d                     | SEEP-SRB1d                    |
| AJ535249  | uncultured delta proteobacterium        | (6) | SEEP-SRB1d                     | SEEP-SRB1d                    |
| EU047539  | uncultured sulfate-reducing bacterium   | (6) | SEEP-SRB1d                     | SEEP-SRB1d                    |
| DQ007534  | uncultured bacterium                    | (6) | SEEP-SRB1b                     | SEEP-SRB1b                    |
| EU179207  | uncultured bacterium                    | (6) | SEEP-SRB1b                     | Desulfobacteraceae_2          |
| EU178996  | uncultured bacterium                    | (6) | SEEP-SRB1b                     | Desulfobacteraceae_2          |
| AJ535247  | uncultured delta proteobacterium        | (6) | SEEP-SRB1b                     | SEEP-SRB1b                    |
| AF354147  | uncultured delta proteobacterium        | (6) | SEEP-SRB1b                     | SEEP-SRB1b                    |
| AB177195  | uncultured bacterium                    | (6) | SEEP-SRB1b                     | SEEP-SRB1b                    |
| AF354151  | uncultured delta proteobacterium        | (6) | SEEP-SRB1b                     | SEEP-SRB1b                    |
| AM229199  | uncultured bacterium                    | (6) | SEEP-SRB1f                     | SEEP-SRB1f                    |
| AY592383  | uncultured bacterium                    | (6) | SEEP-SRB1f                     | SEEP-SRB1f                    |
| AJ535235  | uncultured delta proteobacterium        | (6) | SEEP-SRB1a                     | SEEP-SRB1a                    |
| AF354160  | uncultured delta proteobacterium        | (6) | SEEP-SRB1a                     | SEEP-SRB1a                    |
| DQ004675  | uncultured bacterium                    | (6) | SEEP-SRB1a                     | SEEP-SRB1a                    |
| EU179074  | uncultured bacterium                    | (6) | SEEP-SRB1a                     | SEEP-SRB1a                    |
| AJ704697  | uncultured delta proteobacterium        | (6) | SEEP-SRB1a                     | SEEP-SRB1a                    |
| DQ103601  | uncultured bacterium                    | (6) | SEEP-SRB1a                     | SEEP-SRB1a                    |
| AJ535240  | uncultured delta proteobacterium        | (6) | SEEP-SRB1a                     | SEEP-SRB1a                    |
| EU179072  | uncultured bacterium                    | (6) | SEEP-SRB1a                     | SEEP-SRB1a                    |
| FN550032  | uncultured bacterium                    | (6) | SEEP-SRB1a                     | SEEP-SRB1a                    |
| EU179189  | uncultured bacterium                    | (6) | SEEP-SRB1a                     | SEEP-SRB1a                    |
| FN549927  | uncultured bacterium                    | (6) | SEEP-SRB1a                     | SEEP-SRB1a                    |
| FN550069  | uncultured bacterium                    | (6) | SEEP-SRB1a                     | SEEP-SRB1a                    |
| EU124391  | uncultured delta proteobacterium        | (6) | SEEP-SRB1a                     | SEEP-SRB1a                    |
| EU179049  | uncultured bacterium                    | (6) | SEEP-SRB1a                     | SEEP-SRB1a                    |
| FN549977  | uncultured bacterium                    | (6) | SEEP-SRB1a                     | SEEP-SRB1a                    |
| FN549955  | uncultured bacterium                    | (6) | SEEP-SRB1a                     | SEEP-SRB1a                    |
| FN550070  | uncultured bacterium                    | (6) | SEEP-SRB1a                     | SEEP-SRB1a                    |
| AF354158  | uncultured delta proteobacterium        | (6) | SEEP-SRB1a                     | SEEP-SRB1a                    |
| AF354164  | uncultured delta proteobacterium        | (6) | SEEP-SRB1a                     | SEEP-SRB1a                    |
| FN549961  | uncultured bacterium                    | (6) | SEEP-SRB1a                     | SEEP-SRB1a                    |

|          |                                                     |     |                                                        |                                             |
|----------|-----------------------------------------------------|-----|--------------------------------------------------------|---------------------------------------------|
| AB188779 | uncultured delta proteobacterium                    | (6) | SEEP-SRB1a                                             | SEEP-SRB1a                                  |
| AY592178 | uncultured bacterium                                | (6) | SEEP-SRB1a                                             | SEEP-SRB1a                                  |
| DQ103597 | uncultured bacterium                                | (6) | SEEP-SRB1a                                             | SEEP-SRB1a                                  |
| EU179158 | uncultured bacterium                                | (6) | SEEP-SRB1a                                             | SEEP-SRB1a                                  |
| EU179043 | uncultured bacterium                                | (6) | SEEP-SRB1a                                             | SEEP-SRB1a                                  |
| FN549974 | uncultured bacterium                                | (6) | SEEP-SRB1a                                             | SEEP-SRB1a                                  |
| FN550008 | uncultured bacterium                                | (6) | SEEP-SRB1a                                             | SEEP-SRB1a                                  |
| AF419666 | uncultured bacterium                                | (7) | GNS                                                    | D1_Chloroflexi                              |
| AJ009453 | uncultured bacterium SJA-15                         | (7) | GNS                                                    | D1_Chloroflexi                              |
| AF027041 | unidentified green non-sulfur bacterium OPT90       | (7) | GNS                                                    | D1_Chloroflexi                              |
| AF419664 | uncultured bacterium                                | (7) | GNS                                                    | D1_Chloroflexi                              |
| AF419665 | uncultured bacterium                                | (7) | GNS                                                    | D1_Chloroflexi                              |
| AF419668 | uncultured bacterium                                | (7) | GNS                                                    | D1_Chloroflexi                              |
| AF419669 | uncultured bacterium                                | (7) | GNS                                                    | D1_Chloroflexi                              |
| AF419667 | uncultured bacterium                                | (7) | GNS                                                    | D1_Chloroflexi                              |
| AF419689 | uncultured bacterium                                | (7) | GNS                                                    | D1_Chloroflexi                              |
| AF419695 | uncultured bacterium                                | (7) | GNS                                                    | D1_Chloroflexi                              |
| AF039293 | <i>Herpetosiphon geysericola</i>                    | (7) | <i>Herpetosiphon geysericola</i>                       | <i>Herpetosiphon geysericola</i>            |
| D38365   | <i>Chloroflexus aurantiacus</i> J-10-fl             | (7) | <i>Chloroflexus aurantiacus</i>                        | <i>Chloroflexus aurantiacus</i>             |
| AF027049 | Caldiserica clone OPS107                            | (7) | OP5                                                    | OP5                                         |
| AF419685 | uncultured bacterium                                | (7) | v                                                      | OP5                                         |
| AB015267 | uncultured bacterium                                | (7) | High G+C grampositives                                 | Acidimicrobiales                            |
| AF419678 | uncultured bacterium                                | (7) | High G+C grampositives                                 | Acidimicrobiales                            |
| AB015539 | uncultured actinomycete                             | (7) | High G+C grampositives                                 | Acidimicrobiales                            |
| AJ240976 | uncultured High G+C Gram-positive bacterium Sva0389 | (7) | High G+C grampositives                                 | Acidimicrobiales                            |
| AF419679 | uncultured bacterium                                | (7) | High G+C grampositives                                 | Acidimicrobiales                            |
| M61903   | <i>Propionibacterium acnes</i>                      | (7) | <i>Propionibacterium acnes</i>                         | <i>Propionibacterium acnes</i>              |
| AF419680 | uncultured bacterium                                | (7) | High G+C grampositives                                 | Actinomycetales                             |
| AF419658 | uncultured bacterium                                | (7) | OP11                                                   | OP11_D1                                     |
| AF419660 | uncultured bacterium                                | (7) | OP11                                                   | OP11_D1                                     |
| AF419659 | uncultured bacterium                                | (7) | OP11                                                   | OP11_D1                                     |
| AF419694 | uncultured bacterium                                | (7) | OP11                                                   | OP11                                        |
| AF050599 | uncultured eubacterium WCHB1-26                     | (7) | OP11                                                   | OP11_D2                                     |
| AF419686 | uncultured bacterium                                | (7) | OP11                                                   | OP11_D2                                     |
| AB015580 | uncultured bacterium                                | (7) | OP11                                                   | OD1                                         |
| AB015569 | uncultured bacterium                                | (7) | OP11                                                   | OD1                                         |
| AF419697 | uncultured bacterium                                | (7) | OP11                                                   | OD1                                         |
| AF419683 | uncultured bacterium                                | (7) | OP11                                                   | OD1                                         |
| AF050596 | uncultured eubacterium WCHB1-15                     | (7) | OP11                                                   | WS6                                         |
| AB015532 | uncultured <i>Cytophaga</i> sp.                     | (7) | <i>Cytophaga</i> sp.                                   | <i>Cytophaga</i> sp.                        |
| AF050543 | uncultured eubacterium WCHB1-32                     | (7) | CFB                                                    | CFB                                         |
| AF419687 | uncultured bacterium                                | (7) | CFB                                                    | CFB                                         |
| M64629   | <i>Tenacibaculum maritimum</i>                      | (7) | <i>Tenacibaculum maritimum</i>                         | <i>Tenacibaculum maritimum</i>              |
| AB015545 | uncultured <i>Cytophaga</i> sp.                     | (7) | <i>Cytophaga</i> sp.                                   | CFB                                         |
| AF419681 | uncultured bacterium                                | (7) | CFB                                                    | CFB                                         |
| AF154106 | uncultured hydrocarbon seep bacterium GCA025        | (7) | Bacterial group associated with OP9 candidate division | JS1                                         |
| AF029050 | benzene mineralizing consortium clone SB-45         | (7) | Bacterial group associated with OP9 candidate division | JS1                                         |
| AF419693 | uncultured bacterium                                | (7) | Bacterial group associated with OP9 candidate division | JS1                                         |
| AF419682 | uncultured bacterium                                | (7) | Bacterial group associated with OP9 candidate division | JS1                                         |
| AB015559 | uncultured bacterium                                | (7) | OP3                                                    | OP3                                         |
| AF419696 | uncultured bacterium                                | (7) | OP3                                                    | OP3                                         |
| AF419672 | uncultured bacterium                                | (7) | Planctomycetales                                       | Planctomycetales                            |
| AF419698 | uncultured bacterium                                | (7) | Planctomycetales                                       | Planctomycetales                            |
| X62912   | <i>Blastopirellula marina</i> DSM 3645              | (7) | <i>Pirellula marina</i>                                | <i>Pirellula marina</i>                     |
| AJ231184 | <i>Planctomyces maris</i>                           | (7) | <i>Planctomyces maris</i>                              | <i>Planctomyces maris</i>                   |
| AF202655 | anoxic biofilm clone Pla1-47                        | (7) | Planctomycetales                                       | C. Brocadiales                              |
| AF419673 | uncultured bacterium                                | (7) | Planctomycetales                                       | Planctomycetales                            |
| AF154096 | uncultured hydrocarbon seep bacterium BPC076        | (7) | Planctomycetales                                       | Deltaproteobacteria                         |
| AF050553 | uncultured eubacterium WCHA1-83                     | (7) | OP8                                                    | OP8                                         |
| AF050554 | uncultured eubacterium WFeA1-35                     | (7) | OP8                                                    | OP8                                         |
| AF419675 | uncultured bacterium                                | (7) | Guaymas Bacterial group (GBG)                          | GBG                                         |
| AF419676 | uncultured bacterium                                | (7) | Guaymas Bacterial group (GBG)                          | GBG                                         |
| AF419677 | uncultured bacterium                                | (7) | Guaymas Bacterial group (GBG)                          | GBG                                         |
| X96725   | <i>Thermodesulfobacterium hveragerdense</i>         | (7) | <i>Thermodesulfobacterium hveragerdicum</i>            | <i>Thermodesulfobacterium hveragerdicum</i> |
| AF420367 | uncultured proteobacterium                          | (7) | Gammaproteobacteria                                    | CGS2_a                                      |
| AJ240986 | uncultured gamma proteobacterium Sva0071            | (7) | Gammaproteobacteria                                    | Gammaproteobacteria                         |
| L25707   | <i>Lucina floridana</i> gill symbiont               | (7) | Gammaproteobacteria                                    | CGS2_b                                      |
| L25711   | <i>Anodontia philippiana</i> gill symbiont          | (7) | Gammaproteobacteria                                    | CGS2_b                                      |
| AF420370 | uncultured proteobacterium                          | (7) | Gammaproteobacteria                                    | Gammaproteobacteria                         |
| D86374   | <i>Hydrogenovibrio marinus</i>                      | (7) | <i>Hydrogenovibrio marinus</i>                         | <i>Hydrogenovibrio marinus</i>              |
| AF420363 | uncultured proteobacterium                          | (7) | Gammaproteobacteria                                    | MHGSII                                      |
| AF064543 | <i>Beggiatoa</i> sp. 'Monterey Canyon'              | (7) | <i>Beggiatoa</i> sp.                                   | Beggiatoa                                   |
| AF035956 | <i>Beggiatoa</i> sp. 'Bay of Concepcion'            | (7) | <i>Beggiatoa</i> sp.                                   | Beggiatoa                                   |
| L40994   | <i>Beggiatoa alba</i>                               | (7) | <i>Beggiatoa alba</i>                                  | <i>Beggiatoa alba</i>                       |
| AB015252 | uncultured gamma proteobacterium                    | (7) | Gammaproteobacteria                                    | Gamma_1                                     |
| AF420361 | uncultured proteobacterium                          | (7) | Gammaproteobacteria                                    | Gamma_1                                     |
| AJ240989 | uncultured gamma proteobacterium Sva0318            | (7) | Gammaproteobacteria                                    | Gamma_1                                     |
| X82875   | <i>Syntrophobacter pfenningii</i>                   | (7) | <i>Syntrophobacter pfenningii</i>                      | <i>Syntrophobacter pfenningii</i>           |
| X83274   | <i>Desulforhabdus amnigena</i>                      | (7) | <i>Desulforhabdus amnigena</i>                         | <i>Desulforhabdus amnigena</i>              |
| U25627   | <i>Thermodesulforhabdus norvegica</i>               | (7) | <i>Thermodesulforhabdus norvegicus</i>                 | <i>Thermodesulforhabdus norvegicus</i>      |
| L27426   | <i>Desulfococcus infernum</i>                       | (7) | <i>Desulfococcus infernum</i>                          | <i>Desulfococcus infernum</i>               |
| AF420341 | uncultured proteobacterium                          | (7) | Deltaproteobacteria                                    | Deltaproteobacteria                         |
| AF420368 | uncultured proteobacterium                          | (7) | Desulfobulbaceae                                       | SEEP-SRB4                                   |
| AF420365 | uncultured proteobacterium                          | (7) | Desulfobulbaceae                                       | SEEP-SRB4                                   |
| AF099061 | <i>Desulfotalea arctica</i>                         | (7) | <i>Desulfotalea arctica</i>                            | <i>Desulfotalea arctica</i>                 |
| AF420339 | uncultured proteobacterium                          | (7) | Deltaproteobacteria                                    | Desulfobacteriales_1                        |
| M34408   | <i>Desulfobacterium vacuolatum</i>                  | (7) | <i>Desulfobacterium vacuolatum</i>                     | <i>Desulfobacterium vacuolatum</i>          |
| AF420349 | uncultured proteobacterium                          | (7) | Desulfobacteriaceae                                    | Desulfobacteriaceae                         |
| AF420356 | uncultured proteobacterium                          | (7) | Myxobacteria                                           | Myxococcales                                |
| AF420357 | uncultured proteobacterium                          | (7) | Myxobacteria                                           | Myxococcales                                |
| AF354167 | uncultured delta proteobacterium                    | (7) | Myxobacteria                                           | Myxococcales                                |
| AJ233940 | <i>Chondromyces pediculatus</i>                     | (7) | <i>Chondromyces pediculatus</i>                        | <i>Chondromyces pediculatus</i>             |
| AF420369 | uncultured proteobacterium                          | (7) | Geobacteriaceae                                        | Desulfuromonadales                          |
| X79413   | <i>Pelobacter carbinolicus</i> DSM 2380             | (7) | <i>Pelobacter carbinolicus</i>                         | <i>Pelobacter carbinolicus</i>              |
| L07834   | <i>Geobacter metallireducens</i>                    | (7) | <i>Geobacter metallireducens</i>                       | <i>Geobacter metallireducens</i>            |
| U96918   | <i>Geobacter pelophilus</i>                         | (7) | <i>Geobacter pelophilus</i>                            | <i>Geobacter pelophilus</i>                 |
| AB015258 | unidentified epsilon proteobacterium                | (7) | Epsilonproteobacteria Group I                          | Epsilon_I                                   |
| AB013261 | uncultured epsilon proteobacterium                  | (7) | Epsilonproteobacteria Group I                          | Epsilon_I                                   |
| AF420359 | uncultured proteobacterium                          | (7) | Epsilonproteobacteria Group I                          | Epsilon_I                                   |
| AF420351 | uncultured proteobacterium                          | (7) | Epsilonproteobacteria Group I                          | Epsilon_I                                   |
| AB015582 | uncultured epsilon proteobacterium                  | (7) | Epsilonproteobacteria Group I                          | Epsilon_I                                   |
| AF420346 | uncultured proteobacterium                          | (7) | Epsilonproteobacteria Group I                          | Epsilon_I                                   |
| AF420358 | uncultured proteobacterium                          | (7) | Epsilonproteobacteria Group I                          | Epsilon_I                                   |
| AF420347 | uncultured proteobacterium                          | (7) | Epsilonproteobacteria Group I                          | Epsilon_I                                   |
| AF420360 | uncultured proteobacterium                          | (7) | Epsilonproteobacteria Group I                          | Epsilon_I                                   |
| AF420343 | uncultured proteobacterium                          | (7) | Epsilonproteobacteria Group I                          | Epsilon_I                                   |
| AF420345 | uncultured proteobacterium                          | (7) | Epsilonproteobacteria Group I                          | Epsilon_I                                   |
| U29081   | <i>Rimicaris exoculata</i> ectosymbiont             | (7) | Epsilonproteobacteria Group I                          | Epsilon_I                                   |
| L35523   | <i>Alvinella pompejana</i> epibiont                 | (7) | Epsilonproteobacteria Group I                          | Epsilon_I                                   |
| L35520   | <i>Alvinella pompejana</i> epibiont                 | (7) | Epsilonproteobacteria Group I                          | Epsilon_I                                   |
| AF420348 | uncultured proteobacterium                          | (7) | Epsilonproteobacteria                                  | Epsilon_I                                   |
| AF068805 | uncultured bacterium VC2.1 Bac31                    | (7) | Epsilonproteobacteria                                  | Epsilon_I                                   |
| L14627   | <i>Arcobacter nitrofigilis</i>                      | (7) | <i>Arcobacter nitrofigilis</i>                         | <i>Arcobacter nitrofigilis</i>              |
| U15104   | hydrothermal vent eubacterium PVB_OTU_3             | (7) | Epsilonproteobacteria Group II                         | Helicobacteraceae_2                         |
| U41564   | <i>Sulfospirillum barnesii</i> SES-3                | (7) | <i>Sulfospirillum barnesii</i>                         | <i>Geospirillum barnesii</i>                |
| Y11561   | <i>Sulfospirillum arcachonense</i>                  | (7) | <i>Sulfospirillum arcachonense</i>                     | <i>Sulfospirillum arcachonense</i>          |
| M92323   | <i>Thiovulum</i> sp.                                | (7) | <i>Thiovulum</i> sp.                                   | <i>Thiovulum</i> sp.                        |

|          |                                                        |      |                                              |                                              |
|----------|--------------------------------------------------------|------|----------------------------------------------|----------------------------------------------|
| U04314   | <i>Campylobacter fetus</i>                             | (7)  | <i>Campylobacter fetus</i>                   | <i>Campylobacter fetus</i>                   |
| U01330   | <i>Helicobacter pylori</i>                             | (7)  | <i>Helicobacter pylori</i>                   | <i>Helicobacter pylori</i>                   |
| M26636   | <i>Walinella succinogenes</i>                          | (7)  | <i>Walinella succinogenes</i>                | <i>Walinella succinogenes</i>                |
| AF420342 | uncultured proteobacterium                             | (7)  | Epsilonproteobacteria                        | Epsilonproteobacteria                        |
| AF027081 | candidate division OP9 clone OP846                     | (8)  | OP9                                          | OP9                                          |
| AF027082 | candidate division OP9 clone OP847                     | (8)  | OP9                                          | OP9                                          |
| AF154106 | uncultured hydrocarbon seep bacterium GCA025           | (8)  | JS1                                          | JS1                                          |
| AJ242494 | <i>Maorella thermoactica</i>                           | (8)  | <i>Maorella thermoactica</i>                 | <i>Maorella thermoactica</i>                 |
| U75647   | <i>Acidimicrobium ferrooxidans</i> DSM 10331           | (8)  | <i>Acidimicrobium ferrooxidans</i>           | <i>Acidimicrobium ferrooxidans</i>           |
| D16296   | <i>Hydrogenobaculum acidophilum</i>                    | (8)  | <i>Hydrogenobaculum acidophilum</i>          | <i>Hydrogenobaculum acidophilum</i>          |
| AF027098 | uncultured Aquificales bacterium OPB13                 | (8)  | Aquificae                                    | Aquificales                                  |
| U96663   | <i>Thermus aquaticus</i>                               | (8)  | <i>Thermus aquaticus</i>                     | <i>Thermus aquaticus</i>                     |
| M21413   | <i>Deinococcus radiodurans</i>                         | (8)  | <i>Deinococcus radiodurans</i>               | <i>Deinococcus radiodurans</i>               |
| M58770   | <i>Leeuwenhoekella marinoflava</i>                     | (8)  | <i>Cytophaga marinoflava</i>                 | <i>Cytophaga marinoflava</i>                 |
| L11703   | <i>Thermonema lapsum</i>                               | (8)  | <i>Thermonema lapsum</i>                     | <i>Thermonema lapsum</i>                     |
| D30793   | <i>Variovorax paradoxus</i>                            | (9)  | <i>Variovorax paradoxus</i>                  | <i>Variovorax paradoxus</i>                  |
| AF050527 | uncultured eubacterium WCHA1-62                        | (9)  | Betaproteobacteria                           | Comanadaceae                                 |
| L15532   | <i>Azoarcus</i> sp.                                    | (9)  | <i>Azoarcus</i> sp.                          | Azoarcus                                     |
| AF050526 | uncultured eubacterium WCHA1-52                        | (9)  | Betaproteobacteria                           | Azoarcus Group                               |
| AF050528 | uncultured eubacterium WFeA1-06                        | (9)  | Betaproteobacteria                           | Betaproteobacteria                           |
| AF050626 | uncultured eubacterium WsCH66                          | (9)  | Betaproteobacteria                           | Betaproteobacteria                           |
| AF050529 | uncultured eubacterium WCHA1-76                        | (9)  | Gammaproteobacteria                          | Legionella Group                             |
| AF050530 | uncultured eubacterium WCHA1-85                        | (9)  | Gammaproteobacteria                          | Legionella Group                             |
| MS9157   | <i>Legionella pneumophila</i>                          | (9)  | <i>Legionella pneumophila</i>                | <i>Legionella pneumophila</i>                |
| M95665   | <i>Methylosinus sporium</i>                            | (9)  | <i>Methylosinus sporium</i>                  | <i>Methylosinus sporium</i>                  |
| AF050531 | uncultured eubacterium WCHB1-55                        | (9)  | Alphaproteobacteria                          | Alphaproteobacteria                          |
| M11223   | <i>Agrobacterium tumefaciens</i>                       | (9)  | <i>Agrobacterium tumefaciens</i>             | <i>Agrobacterium tumefaciens</i>             |
| AF050532 | uncultured eubacterium WCHA1-65                        | (9)  | Alphaproteobacteria                          | Alphaproteobacteria                          |
| X72908   | <i>Roseococcus thiosulatophilus</i>                    | (9)  | <i>Roseococcus thiosulatophilus</i>          | <i>Roseococcus thiosulatophilus</i>          |
| AF050533 | uncultured eubacterium WCHB1-87                        | (9)  | Alphaproteobacteria                          | Alphaproteobacteria                          |
| X85132   | <i>Syntrophus gentianae</i>                            | (9)  | <i>Syntrophus gentianae</i>                  | <i>Syntrophus gentianae</i>                  |
| AF050534 | uncultured eubacterium WCHB1-12                        | (9)  | Deltaproteobacteria                          | Syntrophus Group                             |
| AF050535 | uncultured eubacterium WCHA1-07                        | (9)  | Deltaproteobacteria                          | Syntrophus Group                             |
| M26635   | <i>Desulfomonile tiedjei</i>                           | (9)  | Deltaproteobacteria                          | <i>Desulfomonile tiedjei</i>                 |
| AF050537 | uncultured eubacterium WFeA1-10                        | (9)  | Deltaproteobacteria                          | Desulfomonile Group                          |
| X70905   | <i>Syntrophobacter wolnii</i>                          | (9)  | <i>Syntrophobacter wolnii</i>                | <i>Syntrophobacter wolnii</i>                |
| AF050536 | uncultured eubacterium WCHB1-67                        | (9)  | Deltaproteobacteria                          | Desulfobulbaceae_1                           |
| AF050624 | uncultured Syntrophorhabdaceae bacterium WsCH54        | (9)  | Deltaproteobacteria                          | Syntrophorhabdaceae                          |
| L14626   | <i>Arcobacter butzleri</i>                             | (9)  | <i>Arcobacter butzleri</i>                   | <i>Arcobacter butzleri</i>                   |
| AF050595 | uncultured eubacterium WCHB1-06                        | (9)  | WS6                                          | WS6                                          |
| AF050540 | uncultured eubacterium WCHA1-14                        | (9)  | Cytophagales                                 | CFB                                          |
| AF050541 | uncultured eubacterium WCHA1-01                        | (9)  | Cytophagales                                 | CFB                                          |
| AF050542 | uncultured eubacterium WCHA2-47                        | (9)  | Cytophagales                                 | CFB                                          |
| L16498   | <i>Rikenella microfus</i>                              | (9)  | <i>Rikenella microfus</i>                    | <i>Rikenella microfus</i>                    |
| AF050544 | uncultured eubacterium WCHB1-29                        | (9)  | Cytophagales                                 | CFB                                          |
| MS8779   | <i>Sphingobacterium thalophilum</i>                    | (9)  | <i>Sphingobacterium thalophilum</i>          | <i>Sphingobacterium thalophilum</i>          |
| M93153   | <i>Bergeyella zoohelcum</i>                            | (9)  | <i>Bergeyella zoohelcum</i>                  | <i>Bergeyella zoohelcum</i>                  |
| AF050625 | uncultured eubacterium WsCH39                          | (9)  | Cytophagales                                 | CFB                                          |
| AF027009 | unidentified Cytophagales/green sulfur bacterium OPB56 | (9)  | GS                                           | GS                                           |
| AF050546 | uncultured eubacterium WCHA1-94                        | (9)  | GS                                           | GS                                           |
| AF050547 | uncultured eubacterium WCHA1-56                        | (9)  | WS3                                          | Unaffiliated                                 |
| AF050549 | uncultured eubacterium WCHB1-40                        | (9)  | Spirochetes                                  | Spirochetes                                  |
| AF050550 | uncultured eubacterium WCHB1-91                        | (9)  | Spirochetes                                  | Spirochetes                                  |
| AF050551 | uncultured eubacterium WCHB1-30                        | (9)  | Spirochetes                                  | Spirochetes                                  |
| M57737   | <i>Treponema bryantii</i>                              | (9)  | <i>Treponema bryantii</i>                    | <i>Treponema bryantii</i>                    |
| AF050555 | uncultured eubacterium WFeA1-59                        | (9)  | OP8                                          | OP8                                          |
| AF050552 | uncultured eubacterium WCHA1-39                        | (9)  | OP8                                          | OP8                                          |
| AF050556 | uncultured eubacterium WCHA1-89                        | (9)  | TG-1                                         | TG1                                          |
| AB004575 | uncultured bacterium                                   | (9)  | TG-1                                         | TG1                                          |
| X77215   | <i>Halophaga foetida</i> DSM 6591                      | (9)  | <i>Halophaga foetida</i>                     | <i>Halophaga foetida</i>                     |
| AF050581 | uncultured eubacterium WCHB1-49                        | (9)  | Clostridium                                  | Firmicutes                                   |
| AF050628 | uncultured eubacterium WsCH5                           | (9)  | Clostridium                                  | Firmicutes                                   |
| AF050629 | uncultured eubacterium WsCH8                           | (9)  | Clostridium                                  | Firmicutes                                   |
| AF050582 | uncultured eubacterium WCHB1-54                        | (9)  | Clostridium                                  | Firmicutes                                   |
| AF050583 | uncultured eubacterium WCHA1-45                        | (9)  | Clostridium                                  | Firmicutes                                   |
| U09177   | <i>Clostridium cellulosi</i>                           | (9)  | <i>Clostridium cellulosi</i>                 | Firmicutes                                   |
| U27710   | Clostridium-like species                               | (9)  | Clostridium                                  | Firmicutes                                   |
| AF050584 | uncultured eubacterium WCHA1-53                        | (9)  | Clostridium                                  | Firmicutes                                   |
| AF050627 | uncultured eubacterium WsCH1                           | (9)  | Clostridium                                  | Firmicutes                                   |
| AF050587 | uncultured eubacterium WCHB1-20                        | (9)  | Desulfotomaculum / Syntrophomonas            | Firmicutes                                   |
| AF050588 | uncultured eubacterium WCHB1-89                        | (9)  | Desulfotomaculum / Syntrophomonas            | Firmicutes                                   |
| X91170   | <i>Pelotomaculum schinkii</i>                          | (9)  | <i>Pelotomaculum schinkii</i>                | <i>Pelotomaculum schinkii</i>                |
| L15628   | <i>Desulfotomaculum thermobenzoicum</i>                | (9)  | <i>Desulfotomaculum thermobenzoicum</i>      | <i>Desulfotomaculum thermobenzoicum</i>      |
| AF050589 | uncultured eubacterium WCHA1-17                        | (9)  | Desulfotomaculum / Syntrophomonas            | Firmicutes                                   |
| X77849   | <i>Maorella thermoautotrophica</i>                     | (9)  | <i>Maorella thermoautotrophica</i>           | <i>Maorella thermoautotrophica</i>           |
| U09169   | <i>Thermoanaerobacterium saccharolyticum</i>           | (9)  | <i>Thermoanaerobacterium saccharolyticum</i> | <i>Thermoanaerobacterium saccharolyticum</i> |
| AF050585 | uncultured eubacterium WCHA1-71                        | (9)  | Desulfotomaculum / Syntrophomonas            | Firmicutes                                   |
| L28946   | <i>Desulfitobacterium dehalogenans</i> ATCC 51507      | (9)  | <i>Desulfitobacterium dehalogenans</i>       | <i>Desulfitobacterium dehalogenans</i>       |
| AF050591 | uncultured eubacterium WCHB1-84                        | (9)  | Desulfotomaculum / Syntrophomonas            | Firmicutes                                   |
| X70316   | <i>Exiguobacterium aurantiacum</i>                     | (9)  | <i>Exiguobacterium aurantiacum</i>           | <i>Exiguobacterium aurantiacum</i>           |
| AF050592 | uncultured eubacterium WFeA1-16                        | (9)  | Bacillus                                     | Bacillales                                   |
| AF050565 | uncultured eubacterium WCHB1-44                        | (9)  | GNS                                          | D1 Chloroflexi                               |
| AF050563 | uncultured eubacterium WCHB1-80                        | (9)  | GNS                                          | D1 Chloroflexi                               |
| AF050567 | uncultured eubacterium WCHA1-69                        | (9)  | GNS                                          | D1 Chloroflexi                               |
| AF050570 | uncultured eubacterium WCHB1-57                        | (9)  | GNS                                          | D1 Chloroflexi                               |
| AF050594 | uncultured eubacterium WCHB1-03                        | (9)  | OP5                                          | OP5                                          |
| AF050593 | uncultured eubacterium WCHB1-02                        | (9)  | OP5                                          | OP5                                          |
| AF050577 | uncultured eubacterium WCHA1-37                        | (9)  | WS2                                          | WS2                                          |
| AF050573 | uncultured eubacterium WCHB1-08                        | (9)  | Actinobacteria                               | Actinomycetales                              |
| AF050574 | uncultured eubacterium WCHB1-18                        | (9)  | Actinobacteria                               | Actinomycetales                              |
| X77439   | <i>Rathayibacter rathayi</i>                           | (9)  | <i>Rathayibacter rathayi</i>                 | <i>Rathayibacter rathayi</i>                 |
| AF050576 | uncultured eubacterium WFeA1-02                        | (9)  | Actinobacteria                               | Actinobacteria                               |
| AF050575 | uncultured eubacterium WCHA1-79                        | (9)  | OP10                                         | OP10                                         |
| AF027092 | candidate division OP10 clone OPB50                    | (9)  | OP10                                         | OP10                                         |
| AF050579 | uncultured eubacterium WCHA1-78                        | (9)  | WS1                                          | SJA43 WS1                                    |
| AF050623 | uncultured eubacterium WsCH31                          | (9)  | WS4                                          | Unaffiliated                                 |
| AF229791 | uncultured bacterium TA18                              | (10) | OP11                                         | OP11                                         |
| AY193188 | uncultured Microgenomates bacterium                    | (10) | OP11                                         | OP11                                         |
| AY193191 | uncultured Microgenomates bacterium                    | (10) | OP11                                         | OP11                                         |
| AY193204 | uncultured Microgenomates bacterium                    | (10) | OP11                                         | OP11                                         |
| AY193205 | uncultured Microgenomates bacterium                    | (10) | OP11                                         | OP11                                         |
| AY193285 | uncultured Microgenomates bacterium                    | (10) | OP11                                         | OP11_D3                                      |
| AY193287 | uncultured Microgenomates bacterium                    | (10) | OP11                                         | OP11_D3                                      |
| AY193286 | uncultured Microgenomates bacterium                    | (10) | OP11                                         | OP11_D3                                      |
| AY193296 | uncultured Microgenomates bacterium                    | (10) | OP11                                         | OP11_D3                                      |
| AY193128 | uncultured Microgenomates bacterium                    | (10) | OP11                                         | OP11_D3                                      |
| AY193129 | uncultured Microgenomates bacterium                    | (10) | OP11                                         | OP11_D3                                      |
| AY193199 | uncultured Microgenomates bacterium                    | (10) | OP11                                         | OP11_D3                                      |
| AY193295 | uncultured Microgenomates bacterium                    | (10) | OP11                                         | OP11_D3                                      |
| AY193134 | uncultured Microgenomates bacterium                    | (10) | OP11                                         | OP11_D3                                      |
| AY193167 | uncultured Microgenomates bacterium                    | (10) | OP11                                         | OP11_D3                                      |
| AY193135 | uncultured Microgenomates bacterium                    | (10) | OP11                                         | OP11                                         |
| AF125207 | uncultured bacterium X112                              | (10) | SR1                                          | SR1                                          |
| AY193172 | uncultured candidate division SR1 bacterium            | (10) | SR1                                          | SR1                                          |
| AY193173 | uncultured candidate division SR1 bacterium            | (10) | SR1                                          | SR1                                          |
| AB015542 | uncultured bacterium                                   | (10) | SR1                                          | SR1                                          |
| AY193200 | uncultured candidate division SR1 bacterium            | (10) | SR1                                          | SR1                                          |

|           |                                                   |      |                                                    |                                           |
|-----------|---------------------------------------------------|------|----------------------------------------------------|-------------------------------------------|
| AY193201  | uncultured candidate division SR1 bacterium       | (10) | SR1                                                | SR1                                       |
| AY193174  | uncultured candidate division SR1 bacterium       | (10) | SR1                                                | SR1                                       |
| AY193170  | uncultured candidate division SR1 bacterium       | (10) | SR1                                                | SR1                                       |
| AY193171  | uncultured candidate division SR1 bacterium       | (10) | SR1                                                | SR1                                       |
| AY193169  | uncultured candidate division SR1 bacterium       | (10) | SR1                                                | SR1                                       |
| AF050610  | uncultured eubacterium WCHB1-58                   | (10) | OD1                                                | OD1                                       |
| AY193136  | uncultured Parcubacteria bacterium                | (10) | OD1                                                | OD1                                       |
| AY193140  | uncultured Parcubacteria bacterium                | (10) | OD1                                                | OD1                                       |
| AY193195  | uncultured Parcubacteria bacterium                | (10) | OD1                                                | OD1                                       |
| AF316798  | uncultured Crater Lake bacterium CL500-13         | (10) | OD1                                                | OD1                                       |
| AF316799  | uncultured Crater Lake bacterium CL500-94         | (10) | OD1                                                | OD1                                       |
| AB015577  | uncultured bacterium                              | (10) | OD1                                                | OD1                                       |
| AY193133  | uncultured Parcubacteria bacterium                | (10) | OD1                                                | OD1                                       |
| AY193137  | uncultured Parcubacteria bacterium                | (10) | OD1                                                | OD1                                       |
| AY193293  | uncultured Parcubacteria bacterium                | (10) | OD1                                                | OD1                                       |
| AY193161  | uncultured Parcubacteria bacterium                | (10) | OD1                                                | OD1                                       |
| AY193131  | uncultured Parcubacteria bacterium                | (10) | OD1                                                | OD1                                       |
| AY193193  | uncultured Parcubacteria bacterium                | (10) | OD1                                                | OD1                                       |
| AY193125  | uncultured Parcubacteria bacterium                | (10) | OD1                                                | OD1                                       |
| AY193141  | uncultured Parcubacteria bacterium                | (10) | OD1                                                | OD1                                       |
| AY193127  | uncultured Parcubacteria bacterium                | (10) | OD1                                                | OD1                                       |
| AY193130  | uncultured Parcubacteria bacterium                | (10) | OD1                                                | OD1                                       |
| AY193187  | uncultured Parcubacteria bacterium                | (10) | OD1                                                | OD1                                       |
| AY193126  | uncultured Parcubacteria bacterium                | (10) | OD1                                                | OD1                                       |
| AY193158  | uncultured Parcubacteria bacterium                | (10) | OD1                                                | OD1                                       |
| AY193145  | uncultured Parcubacteria bacterium                | (10) | OD1                                                | OD1                                       |
| AY193146  | uncultured Parcubacteria bacterium                | (10) | OD1                                                | OD1                                       |
| AY193147  | uncultured Parcubacteria bacterium                | (10) | OD1                                                | OD1                                       |
| AY193148  | uncultured Parcubacteria bacterium                | (10) | OD1                                                | OD1                                       |
| AY193194  | uncultured Parcubacteria bacterium                | (10) | OD1                                                | OD1                                       |
| AY193185  | uncultured Parcubacteria bacterium                | (10) | OD1                                                | OD1                                       |
| AY193192  | uncultured Parcubacteria bacterium                | (10) | OD1                                                | OD1                                       |
| AY193202  | uncultured Parcubacteria bacterium                | (10) | OD1                                                | OD1                                       |
| AY193202  | uncultured Parcubacteria bacterium                | (10) | OD1                                                | OD1                                       |
| AY193175  | uncultured Parcubacteria bacterium                | (10) | OD1                                                | OD1                                       |
| AY133445  | uncultured bacterium                              | (11) | Myxobacteria                                       | Myxococcales                              |
| AJ535224  | uncultured delta proteobacterium                  | (11) | Myxobacteria                                       | Myxococcales                              |
| AJ233942  | <i>Chondromyces robustus</i>                      | (11) | <i>Chondromyces robustus</i>                       | <i>Chondromyces robustus</i>              |
| AJ233945  | <i>Nannocystis aggregans</i>                      | (11) | <i>Nannocystis aggregans</i>                       | <i>Nannocystis aggregans</i>              |
| AJ233944  | <i>Kofteria flava</i>                             | (11) | <i>Kofteria flava</i>                              | <i>Kofteria flava</i>                     |
| AY094495  | uncultured delta proteobacterium                  | (11) | Deltaproteobacteria                                | Deltaproteobacteria                       |
| AJ535229  | uncultured delta proteobacterium                  | (11) | Deltaproteobacteria                                | Deltaproteobacteria                       |
| AJ535253  | uncultured delta proteobacterium                  | (11) | Deltaproteobacteria                                | Deltaproteobacteria                       |
| M26633    | <i>Desulfobacter postgatei</i>                    | (11) | <i>Desulfobacter postgatei</i>                     | <i>Desulfobacter postgatei</i>            |
| X99637    | <i>Desulfospira joergensenii</i>                  | (11) | <i>Desulfospira joergensenii</i>                   | <i>Desulfospira joergensenii</i>          |
| AF243334  | <i>Desulforegula conservatrix</i>                 | (11) | <i>Desulforegula conservatrix</i>                  | <i>Desulforegula conservatrix</i>         |
| AF099063  | <i>Desulfofaba gelida</i>                         | (11) | <i>Desulfofaba gelida</i>                          | <i>Desulfofaba gelida</i>                 |
| AF099065  | <i>Desulfofrigus fragile</i>                      | (11) | <i>Desulfofrigus fragile</i>                       | <i>Desulfofrigus fragile</i>              |
| AF148141  | delta proteobacterium S2550                       | (11) | Deltaproteobacteria                                | Desulfobacteraceae                        |
| M34405    | <i>Desulfococcus multivorans</i>                  | (11) | <i>Desulfococcus multivorans</i>                   | <i>Desulfococcus multivorans</i>          |
| U45992    | <i>Desulfonema ishimotoi</i>                      | (11) | <i>Desulfonema ishimotoi</i>                       | <i>Desulfonema ishimotoi</i>              |
| U45989    | <i>Desulfonema magnum</i> str. Montpellier        | (11) | <i>Desulfonema magnum</i>                          | <i>Desulfonema magnum</i>                 |
| M34407    | <i>Desulfosarcina variabilis</i>                  | (11) | <i>Desulfosarcina variabilis</i>                   | <i>Desulfosarcina variabilis</i>          |
| AF286034  | saltmarsh clone LCP-80                            | (11) | <i>Desulfosarcina</i> / <i>Desulfococcus</i> (DSS) | Desulfobacteraceae_1                      |
| AF420350  | uncultured proteobacterium                        | (11) | <i>Desulfosarcina</i> / <i>Desulfococcus</i> (DSS) | Desulfobacterales                         |
| Y17698    | <i>Desulfococcus oleovorans</i> Hxd3              | (11) | <i>Desulfosarcina</i> / <i>Desulfococcus</i> (DSS) | Desulfobacteraceae                        |
| AJ240975  | uncultured delta proteobacterium Sva0081          | (11) | <i>Desulfosarcina</i> / <i>Desulfococcus</i> (DSS) | Desulfobacteraceae                        |
| AF121085  | uncultured bacterium ODP8-U3                      | (11) | SEEP-SRB1                                          | SEEP-SRB1a                                |
| AF354146  | uncultured delta proteobacterium                  | (11) | SEEP-SRB1                                          | SEEP-SRB1b                                |
| AF230531  | <i>Desulfomonile limimaris</i>                    | (11) | <i>Desulfomonile limimaris</i>                     | <i>Desulfomonile limimaris</i>            |
| AJ535245  | uncultured delta proteobacterium                  | (11) | Deltaproteobacteria                                | Deltaproteobacteria                       |
| AJ305055  | uncultured delta proteobacterium 43-4             | (11) | Deltaproteobacteria                                | Deltaproteobacteria                       |
| AJ241001  | uncultured delta proteobacterium Sva0485          | (11) | Deltaproteobacteria                                | Deltaproteobacteria                       |
| AF354152  | uncultured delta proteobacterium                  | (11) | SEEP-SRB2 / "Eel2 group"                           | SEEP-SRB2                                 |
| AF354150  | uncultured delta proteobacterium                  | (11) | SEEP-SRB2 / "Eel2 group"                           | SEEP-SRB2                                 |
| AF354157  | uncultured delta proteobacterium                  | (11) | SEEP-SRB2 / "Eel2 group"                           | SEEP-SRB2                                 |
| AF354156  | uncultured delta proteobacterium                  | (11) | SEEP-SRB2 / "Eel2 group"                           | SEEP-SRB2                                 |
| AJ535250  | uncultured delta proteobacterium                  | (11) | SEEP-SRB2 / "Eel2 group"                           | SEEP-SRB2                                 |
| AY050586  | uncultured bacterium                              | (11) | Desulfobulbaceae                                   | Desulfobulbaceae                          |
| AJ535234  | uncultured delta proteobacterium                  | (11) | Desulfobulbaceae                                   | Desulfobulbaceae                          |
| AJ535252  | uncultured delta proteobacterium                  | (11) | Desulfobulbaceae                                   | Desulfobulbaceae                          |
| AF121084  | uncultured bacterium ODP8-U1                      | (11) | Desulfobulbaceae                                   | Desulfobulbaceae                          |
| X95180    | <i>Desulfobulbus elongatus</i>                    | (11) | <i>Desulfobulbus elongatus</i>                     | <i>Desulfobulbus elongatus</i>            |
| U12253    | <i>Desulfobulbus rhabdoformis</i>                 | (11) | <i>Desulfobulbus rhabdoformis</i>                  | <i>Desulfobulbus rhabdoformis</i>         |
| AJ241011  | uncultured delta proteobacterium Sva0631          | (11) | Desulfobulbaceae                                   | Desulfobulbaceae                          |
| AF420334  | uncultured proteobacterium                        | (11) | SEEP-SRB3                                          | SEEP-SRB3                                 |
| AJ535236  | uncultured delta proteobacterium                  | (11) | SEEP-SRB3                                          | SEEP-SRB3                                 |
| AF354166  | uncultured delta proteobacterium                  | (11) | SEEP-SRB3                                          | SEEP-SRB3                                 |
| AF420335  | uncultured proteobacterium                        | (11) | SEEP-SRB3                                          | SEEP-SRB3                                 |
| AJ535243  | uncultured delta proteobacterium                  | (11) | Desulfobulbaceae                                   | Desulfobulbaceae_1                        |
| Y13672    | <i>Desulfocapsa sulfexigens</i> DSM 10523         | (11) | <i>Desulfocapsa sulfexigens</i>                    | <i>Desulfocapsa sulfexigens</i>           |
| AF121082  | uncultured bacterium ODP8-U4                      | (11) | D'capsa group                                      | Desulfobulbaceae_1                        |
| AJ535238  | uncultured delta proteobacterium                  | (11) | D'capsa group                                      | Desulfobulbaceae_1                        |
| AJ535220  | uncultured delta proteobacterium                  | (11) | D'capsa group                                      | Desulfobulbaceae_1                        |
| AJ535227  | uncultured delta proteobacterium                  | (11) | D'capsa group                                      | Desulfobulbaceae_1                        |
| AF121089  | uncultured bacterium ODP8-B4                      | (11) | D'capsa group                                      | Desulfobulbaceae_1                        |
| X99707    | <i>Desulfofustis glycolicus</i>                   | (11) | <i>Desulfofustis glycolicus</i>                    | <i>Desulfofustis glycolicus</i>           |
| L42613    | <i>Desulforhopalus vacuolatus</i>                 | (11) | <i>Desulforhopalus vacuolatus</i>                  | <i>Desulforhopalus vacuolatus</i>         |
| AJ240990  | uncultured delta proteobacterium Sva1036          | (11) | D'rhopalus group                                   | SEEP-SRB4                                 |
| AJ535230  | uncultured delta proteobacterium                  | (11) | SEEP-SRB4                                          | SEEP-SRB4                                 |
| AF354148  | uncultured delta proteobacterium                  | (11) | SEEP-SRB4                                          | SEEP-SRB4                                 |
| AJ535242  | uncultured delta proteobacterium                  | (11) | SEEP-SRB4                                          | SEEP-SRB4                                 |
| AJ535241  | uncultured delta proteobacterium                  | (11) | SEEP-SRB4                                          | SEEP-SRB4                                 |
| AF420368  | uncultured proteobacterium                        | (11) | SEEP-SRB4                                          | SEEP-SRB4                                 |
| F1712472  | uncultured bacterium                              | (12) | SEEP-SRB1a                                         | SEEP-SRB1a                                |
| GU302484  | uncultured bacterium                              | (12) | SEEP-SRB1a                                         | SEEP-SRB1a                                |
| AJ535248  | uncultured delta proteobacterium                  | (12) | SEEP-SRB1e                                         | SEEP-SRB1e                                |
| GU302496  | uncultured bacterium                              | (12) | SEEP-SRB1b                                         | SEEP-SRB1b                                |
| AY053490  | uncultured bacterium                              | (12) | SEEP-SRB1b                                         | SEEP-SRB1b                                |
| GU302442  | uncultured bacterium                              | (12) | DSS                                                | SEEP-SRB1c                                |
| AF354159  | uncultured delta proteobacterium                  | (12) | DSS                                                | Desulfobacteraceae_3                      |
| AY542569  | uncultured delta proteobacterium                  | (12) | DSS                                                | Desulfobacteraceae_3                      |
| AF354165  | uncultured delta proteobacterium                  | (12) | DSS                                                | Desulfobacteraceae_1                      |
| NR_044680 | <i>Desulfosarcina variabilis</i> str. Montpellier | (12) | <i>Desulfosarcina variabilis</i>                   | <i>Desulfosarcina variabilis</i>          |
| NR_025694 | <i>Desulfatibacillum aliphaticivorans</i>         | (12) | <i>Desulfatibacillum aliphaticivorans</i>          | <i>Desulfatibacillum aliphaticivorans</i> |
| DQ067422  | <i>Desulfosalsimonas propionica</i>               | (12) | <i>Desulfosalsimonas propionica</i>                | <i>Desulfosalsimonas propionica</i>       |
| DQ057079  | <i>Desulfobacter psychrotolerans</i>              | (12) | <i>Desulfobacter psychrotolerans</i>               | <i>Desulfobacter psychrotolerans</i>      |
| FNS54123  | uncultured sediment bacterium                     | (12) | Desulfobacteraceae                                 | Desulfobacterales_1                       |
| FJ713478  | uncultured bacterium                              | (12) | Unclassified                                       | Desulfobacterales_2                       |
| GU302440  | uncultured bacterium                              | (12) | Unclassified                                       | Desulfobacterales_2                       |
| FNS54137  | uncultured sediment bacterium                     | (12) | Unclassified                                       | Desulfobacteraceae                        |
| EU622293  | uncultured bacterium                              | (12) | Desulfobulbaceae                                   | Desulfobulbaceae                          |



|           |                                                                    |      |                                      |                                      |
|-----------|--------------------------------------------------------------------|------|--------------------------------------|--------------------------------------|
| FJ712599  | uncultured bacterium                                               | (12) | Desulfobulbaceae                     | Desulfobulbaceae                     |
| AJ535251  | uncultured delta proteobacterium                                   | (12) | SEEP-SRB3                            | SEEP-SRB3                            |
| AY531563  | uncultured bacterium                                               | (12) | SEEP-SRB3                            | SEEP-SRB3                            |
| AY592930  | uncultured bacterium                                               | (12) | SEEP-SRB3                            | SEEP-SRB3                            |
| AF420336  | uncultured proteobacterium                                         | (12) | SEEP-SRB3                            | Desulfobulbaceae                     |
| AF420366  | uncultured proteobacterium                                         | (12) | SEEP-SRB4                            | SEEP-SRB4                            |
| AJ535218  | uncultured delta proteobacterium                                   | (12) | SEEP-SRB4                            | SEEP-SRB4                            |
| AF118453  | <i>Desulfarhopalus singaporensis</i>                               | (12) | <i>Desulfarhopalus singaporensis</i> | <i>Desulfarhopalus singaporensis</i> |
| AY592929  | uncultured bacterium                                               | (12) | Desulfobulbaceae                     | Desulfobulbaceae_1                   |
| AF420338  | uncultured proteobacterium                                         | (12) | SEEP-SRB2                            | SEEP-SRB2                            |
| AF420337  | uncultured proteobacterium                                         | (12) | SEEP-SRB2                            | SEEP-SRB2                            |
| AJ535233  | uncultured delta proteobacterium                                   | (12) | SEEP-SRB2                            | SEEP-SRB2                            |
| NR_043214 | <i>Desulfuromusa ferrireducens</i>                                 | (12) | <i>Desulfuromusa ferrireducens</i>   | <i>Desulfuromusa ferrireducens</i>   |
| FJ712531  | uncultured bacterium                                               | (12) | Unaffiliated                         | Myxococcales                         |
| JF344499  | uncultured delta proteobacterium                                   | (12) | Unaffiliated                         | Unaffiliated_D4                      |
| AY055373  | <i>Acinetobacter</i> sp. 'anoxic'                                  | (13) | <i>Acinetobacter</i> sp.             | <i>Acinetobacter</i>                 |
| AY436526  | uncultured proteobacterium                                         | (13) | Gammaproteobacteria                  | <i>Acinetobacter</i>                 |
| AF511436  | <i>Pseudomonas alcaligenes</i>                                     | (13) | <i>Pseudomonas alcaligenes</i>       | <i>Pseudomonas alcaligenes</i>       |
| AY268175  | <i>Pseudomonas aeruginosa</i>                                      | (13) | <i>Pseudomonas aeruginosa</i>        | <i>Pseudomonas aeruginosa</i>        |
| AY043387  | <i>Serratia marcescens</i>                                         | (13) | <i>Serratia marcescens</i>           | <i>Serratia marcescens</i>           |
| AJ293468  | <i>Stenotrophomonas maltophilia</i>                                | (13) | <i>Stenotrophomonas maltophilia</i>  | <i>Stenotrophomonas maltophilia</i>  |
| AB074256  | <i>Delftia acidovorans</i>                                         | (13) | <i>Delftia acidovorans</i>           | <i>Delftia acidovorans</i>           |
| AB015567  | uncultured beta proteobacterium                                    | (13) | Betaproteobacteria                   | Comanadaceae                         |
| AF353160  | <i>Nitrosomonas europaea</i>                                       | (13) | <i>Nitrosomonas europaea</i>         | <i>Nitrosomonas europaea</i>         |
| D49422    | <i>Brevundimonas diminuta</i>                                      | (13) | <i>Brevundimonas diminuta</i>        | <i>Brevundimonas diminuta</i>        |
| AB016847  | <i>Caulobacter</i> sp. MBI1C1405                                   | (13) | <i>Caulobacter</i> sp.               | <i>Caulobacter</i>                   |
| AY191330  | uncultured Hyphomicrobiaceae bacterium                             | (13) | Alphaproteobacteria                  | Hyphomicrobiaceae                    |
| AY093474  | uncultured bacterium                                               | (13) | NT-B2                                | NTB2                                 |
| AY191339  | uncultured Aminicenantes bacterium                                 | (13) | OP8                                  | OP8                                  |
| AF027068  | candidate division OP8 clone OPB23                                 | (13) | OP8                                  | OP8                                  |
| AB094921  | uncultured bacterium                                               | (13) | JS1                                  | JS1                                  |
| AY093469  | uncultured candidate division JS1 bacterium                        | (13) | JS1                                  | JS1                                  |
| AY436531  | uncultured candidate division JS1 bacterium                        | (13) | JS1                                  | JS1                                  |
| AF029043  | benzene mineralizing consortium clone SB-15                        | (13) | JS1                                  | JS1                                  |
| X67148    | <i>Atopobium minutum</i>                                           | (13) | <i>Atopobium minutum</i>             | <i>Atopobium minutum</i>             |
| AY436533  | uncultured bacterium                                               | (13) | Planctomycetes                       | WPS1                                 |
| AY191354  | uncultured planctomycete                                           | (13) | Planctomycetes                       | WPS1                                 |
| X81941    | <i>Pirellula</i> sp.                                               | (13) | <i>Pirellula</i> sp.                 | <i>Pirellula</i> sp.                 |
| AF354663  | <i>Desulfobulbus mediterraneus</i>                                 | (13) | <i>Desulfobulbus mediterraneus</i>   | <i>Desulfobulbus mediterraneus</i>   |
| AB094804  | uncultured bacterium                                               | (13) | Deltaproteobacteria                  | Desulfobacterales_2                  |
| AB094812  | uncultured bacterium                                               | (13) | NT-B4                                | D2_Chloroflexi                       |
| AB094801  | uncultured bacterium                                               | (13) | NT-B4                                | D2_Chloroflexi                       |
| AB094950  | uncultured bacterium                                               | (13) | NT-B3                                | D2_Chloroflexi                       |
| AY191351  | uncultured Chloroflexi bacterium                                   | (13) | NT-B3                                | D2_Chloroflexi                       |
| AY093479  | uncultured bacterium                                               | (13) | NT-B3                                | D2_Chloroflexi                       |
| AB094831  | uncultured bacterium                                               | (13) | NT-B3                                | D2_Chloroflexi                       |
| AB094799  | uncultured bacterium                                               | (13) | NT-B3                                | D2_Chloroflexi                       |
| AY187919  | uncultured bacterium                                               | (13) | Bacteroidetes                        | CFB                                  |
| AF361187  | <i>Flexibacter</i> sp. CF 1                                        | (13) | <i>Flexibacter</i> sp.               | <i>Flexibacter</i> sp.               |
| M59051    | <i>Flavobacterium johnsoniae</i>                                   | (13) | <i>Flavobacterium johnsoniae</i>     | <i>Flavobacterium johnsoniae</i>     |
| M21774    | <i>Thermotoga maritima</i>                                         | (13) | <i>Thermotoga maritima</i>           | <i>Thermotoga maritima</i>           |
| M59176    | <i>Fervidobacterium icelandicum</i>                                | (13) | <i>Fervidobacterium icelandicum</i>  | <i>Fervidobacterium icelandicum</i>  |
| L10659    | <i>Geotoga subterranea</i>                                         | (13) | <i>Geotoga subterranea</i>           | <i>Geotoga subterranea</i>           |
| AJ515724  | uncultured Deferribacteres bacterium                               | (14) | Deferribacteres                      | Deferribacteres                      |
| FM863731  | uncultured Deferribacteres bacterium                               | (14) | Deferribacteres                      | Deferribacteres                      |
| FM863732  | uncultured Deferribacteres bacterium                               | (14) | Deferribacteres                      | Deferribacteres                      |
| FM863733  | uncultured Deferribacteres bacterium                               | (14) | Deferribacteres                      | Deferribacteres                      |
| FM863730  | uncultured Deferribacteres bacterium                               | (14) | Deferribacteres                      | Deferribacteres                      |
| AJ515720  | uncultured Entomoplasmatales bacterium                             | (14) | Entomoplasmatales                    | Mollicutes                           |
| FN562893  | uncultured bacterium                                               | (14) | Mollicutes                           | Mollicutes                           |
| FM881775  | uncultured Mollicutes bacterium                                    | (14) | Mollicutes                           | Mollicutes                           |
| FM883736  | uncultured Mollicutes bacterium                                    | (14) | Mollicutes                           | Mollicutes                           |
| GU292201  | uncultured bacterium                                               | (14) | Mollicutes                           | Mollicutes                           |
| FM863737  | uncultured Mollicutes bacterium                                    | (14) | Mollicutes                           | Mollicutes                           |
| GQ386067  | uncultured bacterium                                               | (14) | Mollicutes                           | Mollicutes                           |
| EU662369  | uncultured bacterium                                               | (14) | CFB                                  | CFB                                  |
| AY678514  | uncultured Bacteroidetes bacterium                                 | (14) | Bacteroidetes                        | CFB                                  |
| AB305587  | uncultured bacterium                                               | (14) | CFB                                  | CFB                                  |
| HQ672162  | uncultured bacterium                                               | (14) | CFB                                  | CFB                                  |
| FN662612  | CFB group bacterium epibiont of <i>Rimicaris exoculata</i>         | (14) | CFB                                  | CFB                                  |
| AJ441240  | uncultured Bacteroidetes bacterium                                 | (14) | CFB                                  | CFB                                  |
| AY352928  | uncultured bacterium                                               | (14) | CFB                                  | CFB                                  |
| FN662606  | CFB group bacterium epibiont of <i>Rimicaris exoculata</i>         | (14) | CFB                                  | CFB                                  |
| FN658702  | Bacteroidetes bacterium ectosymbiont of <i>Rimicaris exoculata</i> | (14) | symbiontBacteroidetesymbiont         | CFB                                  |
| AY542563  | uncultured Bacteroidetes bacterium                                 | (14) | Bacteroidetes                        | CFB                                  |
| EU919789  | uncultured bacterium                                               | (14) | CFB                                  | CFB                                  |
| HQ203953  | uncultured bacterium                                               | (14) | CFB                                  | CFB                                  |
| FM165250  | uncultured bacterium                                               | (14) | CFB                                  | CFB                                  |
| FJ905651  | uncultured bacterium                                               | (14) | CFB                                  | CFB                                  |
| HQ673054  | uncultured bacterium                                               | (14) | CFB                                  | CFB                                  |
| AY280420  | uncultured Bacteroidetes bacterium                                 | (14) | CFB                                  | CFB                                  |
| AJ431238  | <i>Cytophaga</i> sp. BHI80-3                                       | (14) | <i>Cytophaga</i> sp.                 | Spirochaetes                         |
| FN562914  | uncultured bacterium                                               | (14) | CFB                                  | CFB                                  |
| FJ358900  | uncultured Bacteroidetes bacterium                                 | (14) | CFB                                  | CFB                                  |
| FM165269  | uncultured bacterium                                               | (14) | Verrucomicrobiae                     | Verruco_D5                           |
| EF208729  | uncultured bacterium                                               | (14) | Verrucomicrobiae                     | Verruco_D5                           |
| AB611176  | uncultured Verrucomicrobia bacterium                               | (14) | Verrucomicrobiae                     | Verruco_D5                           |
| JN662163  | uncultured bacterium                                               | (14) | Verrucomicrobiae                     | Verruco_D5                           |
| HQ225122  | uncultured bacterium                                               | (14) | Verrucomicrobiae                     | Verruco_D1b                          |
| GQ452875  | uncultured Verrucomicrobia bacterium                               | (14) | Verrucomicrobiae                     | Verruco_D1b                          |
| FM883738  | uncultured Mollicutes bacterium                                    | (14) | Firmicutes                           | Mollicutes                           |
| HQ264089  | uncultured <i>Clostridium</i> sp.                                  | (14) | <i>Clostridium</i>                   | Firmicutes                           |
| FJ957639  | uncultured <i>Staphylococcus</i> sp.                               | (14) | <i>Staphylococcus</i> sp.            | <i>Staphylococcus</i> sp.            |
| FM883763  | uncultured Firmicutes bacterium                                    | (14) | Firmicutes                           | Mollicutes                           |
| AB298756  | Clostridiaceae bacterium SH021                                     | (14) | Clostridiaceae                       | Firmicutes                           |
| AM696843  | uncultured bacterium                                               | (14) | Actinobacteraceae                    | Actinomycetales                      |
| JN609310  | uncultured bacterium                                               | (14) | Actinobacteraceae                    | Actinomycetales                      |
| AJ969460  | uncultured Thermodesulfobacteriaceae bacterium                     | (14) | Thermodesulfobacteriaceae            | Thermodesulfobacteria                |
| EU435435  | <i>Thermodesulfator atlanticus</i>                                 | (14) | <i>Thermodesulfator atlanticus</i>   | <i>Thermodesulfator atlanticus</i>   |
| AJ969464  | uncultured Aquificales bacterium                                   | (14) | Aquificales                          | Aquificales                          |
| AJ969466  | uncultured Aquificales bacterium                                   | (14) | Aquificales                          | Aquificales                          |
| AB496522  | uncultured Chloroflexi bacterium                                   | (14) | Chloroflexi                          | D1_Chloroflexi                       |
| EU265798  | uncultured proteobacterium                                         | (14) | Unaffiliated                         | PCGroup_D2                           |
| AB464836  | uncultured bacterium                                               | (14) | Unaffiliated                         | PCGroup_D4                           |
| DQ910026  | uncultured bacterium                                               | (14) | Unaffiliated                         | OD1                                  |
| AJ441233  | uncultured bacterium                                               | (14) | Unaffiliated                         | OP8                                  |
| FN562888  | uncultured bacterium                                               | (14) | Unaffiliated                         | OD1                                  |
| HM798723  | uncultured SAR406 cluster bacterium                                | (14) | SAR406                               | SAR406                               |
| AB305412  | uncultured bacterium                                               | (14) | Unaffiliated                         | OD1                                  |
| AJ515712  | uncultured epsilon proteobacteria                                  | (14) | Epsilonproteobacteria                | Helicobacteraceae_2                  |
| AY225626  | uncultured epsilon proteobacterium                                 | (14) | Epsilonproteobacteria                | Epsilon_I                            |
| FJ535307  | uncultured bacterium                                               | (14) | Epsilonproteobacteria                | Epsilon_I                            |
| FJ497632  | uncultured gamma proteobacterium                                   | (14) | Epsilonproteobacteria                | Helicobacteraceae_2                  |
| FM203396  | epsilon proteobacterium ectosymbiont of <i>Rimicaris exoculata</i> | (14) | Epsilonproteobacteria                | Epsilon_I                            |
| AM4412509 | uncultured epsilon proteobacterium                                 | (14) | Epsilonproteobacteria                | Epsilon_I                            |
| FM203406  | epsilon proteobacterium ectosymbiont of <i>Rimicaris exoculata</i> | (14) | Epsilonproteobacteria                | Epsilon_I                            |
| AB476174  | uncultured bacterium                                               | (14) | Epsilonproteobacteria                | Epsilon_I                            |

|           |                                                                                |      |                                     |                                     |
|-----------|--------------------------------------------------------------------------------|------|-------------------------------------|-------------------------------------|
| FN658696  | epsilon proteobacterium ectosymbiont of <i>Rimicaris exoculata</i>             | (14) | Epsilonproteobacteria               | Epsilon_I                           |
| FN562857  | uncultured epsilon proteobacterium                                             | (14) | Epsilonproteobacteria               | Epsilon_I                           |
| EU925883  | uncultured bacterium                                                           | (14) | Epsilonproteobacteria               | Epsilon_I                           |
| FN429840  | uncultured epsilon proteobacterium                                             | (14) | Epsilonproteobacteria               | Epsilon_I                           |
| EU488101  | uncultured bacterium                                                           | (14) | Epsilonproteobacteria               | Epsilon_I                           |
| AM712341  | uncultured epsilon proteobacterium                                             | (14) | Epsilonproteobacteria               | Epsilon_I                           |
| AY531602  | uncultured bacterium                                                           | (14) | Epsilonproteobacteria               | Epsilon_I                           |
| AM2295221 | uncultured bacterium                                                           | (14) | Epsilonproteobacteria               | Campylobacteraceae_2                |
| AY225610  | uncultured epsilon proteobacterium                                             | (14) | Epsilonproteobacteria               | Campylobacteraceae_2                |
| GG357039  | uncultured bacterium                                                           | (14) | Epsilonproteobacteria               | Epsilon_I                           |
| DQ228555  | uncultured bacterium                                                           | (14) | Epsilonproteobacteria               | PCGroup_D1                          |
| FN562833  | uncultured epsilon proteobacterium                                             | (14) | Epsilonproteobacteria               | Epsilon_I                           |
| HQ388458  | uncultured bacterium                                                           | (14) | Epsilonproteobacteria               | Epsilon_I                           |
| FN562859  | uncultured epsilon proteobacterium                                             | (14) | Epsilonproteobacteria               | Epsilon_I                           |
| GU197438  | uncultured bacterium                                                           | (14) | Epsilonproteobacteria               | Epsilon_I                           |
| FR853051  | uncultured bacterium                                                           | (14) | Epsilonproteobacteria               | Epsilonproteobacteria               |
| AY704396  | uncultured bacterium                                                           | (14) | Epsilonproteobacteria               | Campylobacteraceae_1                |
| FN562871  | uncultured epsilon proteobacterium                                             | (14) | Epsilonproteobacteria               | Epsilon_I                           |
| FM203395  | epsilon proteobacterium ectosymbiont of <i>Rimicaris exoculata</i>             | (14) | Epsilonproteobacteria               | Epsilon_I                           |
| AM268746  | uncultured prokaryote                                                          | (14) | Epsilonproteobacteria               | PCGroup_D1                          |
| FM40823   | uncultured bacterium                                                           | (14) | Epsilonproteobacteria               | Epsilon_I                           |
| FM165251  | uncultured bacterium                                                           | (14) | Epsilonproteobacteria               | Epsilon_I                           |
| AM412516  | uncultured epsilon proteobacterium                                             | (14) | Epsilonproteobacteria               | Helicobacteraceae_2                 |
| AM412513  | uncultured epsilon proteobacterium                                             | (14) | Epsilonproteobacteria               | Epsilon_I                           |
| AY69489   | uncultured epsilon proteobacterium                                             | (14) | Epsilonproteobacteria               | Campylobacteraceae_1                |
| FN562855  | uncultured epsilon proteobacterium                                             | (14) | Epsilonproteobacteria               | Epsilon_I                           |
| AY225617  | uncultured epsilon proteobacterium                                             | (14) | Epsilonproteobacteria               | Epsilon_I                           |
| AF367490  | uncultured epsilon proteobacterium                                             | (14) | Epsilonproteobacteria               | Helicobacteraceae_2                 |
| FN562836  | uncultured epsilon proteobacterium                                             | (14) | Epsilonproteobacteria               | Epsilon_I                           |
| FA97628   | uncultured gamma proteobacterium                                               | (14) | Epsilonproteobacteria               | Gammmaproteobacteria                |
| AF367488  | uncultured epsilon proteobacterium                                             | (14) | Epsilonproteobacteria               | PCGroup_D1                          |
| FI792210  | uncultured bacterium                                                           | (14) | Epsilonproteobacteria               | Campylobacteraceae_1                |
| FI792393  | uncultured bacterium                                                           | (14) | Epsilonproteobacteria               | Campylobacteraceae_1                |
| AM086106  | uncultured bacterium                                                           | (14) | Epsilonproteobacteria               | PCGroup_D1                          |
| EU555136  | uncultured bacterium                                                           | (14) | Epsilonproteobacteria               | Helicobacteraceae_2                 |
| FN658698  | epsilon proteobacterium ectosymbiont of <i>Rimicaris exoculata</i>             | (14) | Epsilonproteobacteria               | Campylobacteraceae_1                |
| EU652648  | uncultured bacterium                                                           | (14) | Epsilonproteobacteria               | Helicobacteraceae_2                 |
| AB440163  | uncultured bacterium                                                           | (14) | Epsilonproteobacteria               | Epsilon_I                           |
| AY225614  | uncultured epsilon proteobacterium                                             | (14) | Epsilonproteobacteria               | Epsilon_I                           |
| FN562858  | uncultured epsilon proteobacterium                                             | (14) | Epsilonproteobacteria               | Epsilon_I                           |
| FN562867  | uncultured epsilon proteobacterium                                             | (14) | Epsilonproteobacteria               | Epsilon_I                           |
| EF644836  | uncultured bacterium                                                           | (14) | Epsilonproteobacteria               | Epsilon_I                           |
| EF644833  | uncultured bacterium                                                           | (14) | Epsilonproteobacteria               | Epsilon_I                           |
| AF357198  | <i>Sulfospirillum</i> sp. Am-N                                                 | (14) | <i>Sulfospirillum</i> sp.           | <i>Sulfospirillum</i> sp.           |
| FI792340  | uncultured bacterium                                                           | (14) | Epsilonproteobacteria               | Campylobacteraceae_1                |
| FI792021  | uncultured bacterium                                                           | (14) | Epsilonproteobacteria               | PCGroup_D1                          |
| AY969452  | uncultured epsilon proteobacterium                                             | (14) | Epsilonproteobacteria               | Nautiliales                         |
| FI535300  | uncultured bacterium                                                           | (14) | Epsilonproteobacteria               | Epsilon_I                           |
| AY691430  | <i>Caminibacter mediantlanticus</i> TB-2                                       | (14) | <i>Caminibacter mediantlanticus</i> | <i>Caminibacter mediantlanticus</i> |
| FN562878  | uncultured bacterium                                                           | (14) | Epsilonproteobacteria               | PCGroup_D1                          |
| DQ909330  | uncultured bacterium                                                           | (14) | Epsilonproteobacteria               | PCGroup_D1                          |
| GU197436  | uncultured epsilon proteobacterium                                             | (14) | Epsilonproteobacteria               | Epsilon_I                           |
| AF068783  | uncultured bacterium VC2.1 Bac1                                                | (14) | Epsilonproteobacteria               | Epsilon_I                           |
| EU662338  | uncultured bacterium                                                           | (14) | Epsilonproteobacteria               | Epsilon_I                           |
| FM203385  | epsilon proteobacterium ectosymbiont of <i>Rimicaris exoculata</i>             | (14) | Epsilonproteobacteria               | Epsilon_I                           |
| AF068796  | uncultured bacterium VC2.1 Bac19                                               | (14) | Epsilonproteobacteria               | Nautiliales                         |
| AB193954  | uncultured bacterium                                                           | (14) | Epsilonproteobacteria               | Epsilonproteobacteria               |
| GU208477  | uncultured prokaryote                                                          | (14) | Epsilonproteobacteria               | Epsilon_I                           |
| AY548994  | uncultured bacterium                                                           | (14) | Epsilonproteobacteria               | Campylobacteraceae_1                |
| AM745129  | uncultured epsilon proteobacterium                                             | (14) | Epsilonproteobacteria               | Epsilon_I                           |
| FA97265   | uncultured epsilon proteobacterium                                             | (14) | Epsilonproteobacteria               | Epsilon_I                           |
| AB015531  | uncultured epsilon proteobacterium                                             | (14) | Epsilonproteobacteria               | Epsilon_I                           |
| FA97357   | uncultured bacterium                                                           | (14) | Epsilonproteobacteria               | Helicobacteraceae_2                 |
| FI205272  | uncultured epsilon proteobacterium                                             | (14) | Epsilonproteobacteria               | Helicobacteraceae_2                 |
| GQ261779  | uncultured epsilon proteobacterium                                             | (14) | Epsilonproteobacteria               | Epsilon_I                           |
| FN658694  | epsilon proteobacterium ectosymbiont of <i>Rimicaris exoculata</i>             | (14) | Epsilonproteobacteria               | Epsilon_I                           |
| HM591450  | uncultured bacterium                                                           | (14) | Epsilonproteobacteria               | Epsilon_I                           |
| EU487967  | uncultured bacterium                                                           | (14) | Epsilonproteobacteria               | Helicobacteraceae_2                 |
| GQ848422  | uncultured bacterium                                                           | (14) | Epsilonproteobacteria               | Helicobacteraceae_2                 |
| GQ848459  | uncultured bacterium                                                           | (14) | Epsilonproteobacteria               | Alphaproteobacteria                 |
| EF687160  | uncultured bacterium                                                           | (14) | Epsilonproteobacteria               | Unclassified                        |
| AB476195  | uncultured bacterium                                                           | (14) | Epsilonproteobacteria               | PCGroup_D1                          |
| FM203378  | gamma proteobacterium ectosymbiont of <i>Rimicaris exoculata</i>               | (14) | Gammmaproteobacteria                | Leucothrix_Group                    |
| FN393021  | gamma proteobacterium ectosymbiont of <i>Rimicaris exoculata</i>               | (14) | Gammmaproteobacteria                | Leucothrix_Group                    |
| FN393025  | gamma proteobacterium ectosymbiont of <i>Rimicaris exoculata</i>               | (14) | Gammmaproteobacteria                | Leucothrix_Group                    |
| HQ399822  | uncultured rumen bacterium                                                     | (14) | Gammmaproteobacteria                | Pseudomonadales_1                   |
| AB597540  | uncultured gamma proteobacterium                                               | (14) | Gammmaproteobacteria                | Gammmaproteobacteria                |
| FI889641  | <i>Photobacterium</i> sp. NF1-15                                               | (14) | <i>Photobacterium</i> sp.           | <i>Photobacterium</i> sp.           |
| AY292951  | <i>Photobacterium leiognathi</i>                                               | (14) | <i>Photobacterium leiognathi</i>    | <i>Photobacterium leiognathi</i>    |
| AM902727  | uncultured gamma proteobacterium                                               | (14) | Gammmaproteobacteria                | Leucothrix_Group                    |
| AY704661  | uncultured gamma proteobacterium                                               | (14) | Gammmaproteobacteria                | Methylococcales                     |
| AM083965  | methanotrophic endosymbiont of <i>Bathymodiolus puteoserpentis</i> (Logatchev) | (14) | Gammmaproteobacteria                | Methylococcales                     |
| AF354608  | uncultured gamma proteobacterium                                               | (14) | Gammmaproteobacteria                | Piscirickettsiaceae                 |
| AB176166  | uncultured bacterium                                                           | (14) | Gammmaproteobacteria                | Piscirickettsiaceae                 |
| EF644812  | uncultured bacterium                                                           | (14) | Gammmaproteobacteria                | Gammmaproteobacteria                |
| EF644791  | uncultured bacterium                                                           | (14) | Gammmaproteobacteria                | Piscirickettsiaceae                 |
| EU617815  | uncultured bacterium                                                           | (14) | Gammmaproteobacteria                | Vibrionales                         |
| NR_024805 | <i>Colwellia piezophila</i>                                                    | (14) | <i>Colwellia piezophila</i>         | <i>Colwellia piezophila</i>         |
| DQ837304  | uncultured gamma proteobacterium                                               | (14) | Gammmaproteobacteria                | Colwellia_Group                     |
| EU557341  | <i>Serratia</i> sp. 136-2                                                      | (14) | <i>Serratia</i> sp.                 | <i>Serratia</i> sp.                 |
| EU491928  | uncultured bacterium                                                           | (14) | Gammmaproteobacteria                | Colwellia_Group                     |
| JO111316  | uncultured bacterium                                                           | (14) | Gammmaproteobacteria                | Acinetobacter                       |
| EU107481  | uncultured <i>Leucothrix</i> sp.                                               | (14) | <i>Leucothrix</i> sp.               | <i>Leucothrix</i> sp.               |
| HM110455  | uncultured gamma proteobacterium                                               | (14) | Gammmaproteobacteria                | Xanthomonadales                     |
| EU335291  | uncultured bacterium                                                           | (14) | Gammmaproteobacteria                | Unaffiliated                        |
| AY669171  | <i>Marinobacter hydrocarbonoclasticus</i>                                      | (14) | <i>Marinobacter aquaeolei</i>       | <i>Marinobacter aquaeolei</i>       |
| HQ191049  | uncultured sediment bacterium                                                  | (14) | Gammmaproteobacteria                | Gammmaproteobacteria                |
| CU915011  | uncultured bacterium                                                           | (14) | Gammmaproteobacteria                | Pseudomonadales_1                   |
| EU804489  | uncultured bacterium                                                           | (14) | Gammmaproteobacteria                | Gammmaproteobacteria                |
| FA97609   | uncultured gamma proteobacterium                                               | (14) | Gammmaproteobacteria                | Piscirickettsiaceae                 |
| AB273731  | <i>Shigella boydii</i>                                                         | (14) | <i>Shigella boydii</i>              | <i>Shigella boydii</i>              |
| FM203381  | gamma proteobacterium ectosymbiont of <i>Rimicaris exoculata</i>               | (14) | Gammmaproteobacteria                | Leucothrix_Group                    |
| EU466025  | uncultured bacterium                                                           | (14) | Gammmaproteobacteria                | Enterobacteriales                   |
| FI792231  | uncultured bacterium                                                           | (14) | Gammmaproteobacteria                | Sulfurivirga_Group                  |
| FI640811  | uncultured bacterium                                                           | (14) | Gammmaproteobacteria                | Gammmaproteobacteria                |
| EU778504  | uncultured bacterium                                                           | (14) | Gammmaproteobacteria                | Enterobacteriales                   |
| AB476230  | uncultured bacterium                                                           | (14) | Gammmaproteobacteria                | Piscirickettsiaceae                 |
| AB476182  | uncultured bacterium                                                           | (14) | Gammmaproteobacteria                | Leucothrix_Group                    |
| EF644790  | uncultured bacterium                                                           | (14) | Gammmaproteobacteria                | Piscirickettsiaceae                 |
| AJ535221  | uncultured gamma proteobacterium                                               | (14) | Gammmaproteobacteria                | Methylococcales                     |
| AB476225  | uncultured bacterium                                                           | (14) | Gammmaproteobacteria                | Piscirickettsiaceae                 |
| DQ395681  | uncultured organism                                                            | (14) | Alphaproteobacteria                 | Alphaproteobacteria                 |
| GU584499  | uncultured bacterium                                                           | (14) | Alphaproteobacteria                 | Rhodobacteriales                    |
| DQ270648  | uncultured bacterium                                                           | (14) | Alphaproteobacteria                 | Rhodobacteriales                    |
| AB518773  | alpha proteobacterium TI_chim_Sur55-1                                          | (14) | Alphaproteobacteria                 | Alphaproteobacteria                 |
| FN562825  | uncultured alpha proteobacterium                                               | (14) | Alphaproteobacteria                 | Rhodobacteriales                    |
| HQ682047  | uncultured bacterium                                                           | (14) | Alphaproteobacteria                 | Caulobacterales                     |

|          |                                                                                |      |                                       |                                       |
|----------|--------------------------------------------------------------------------------|------|---------------------------------------|---------------------------------------|
| DQ925896 | uncultured bacterium                                                           | (14) | Alphaproteobacteria                   | Alphaproteobacteria                   |
| HQ153899 | uncultured bacterium                                                           | (14) | Alphaproteobacteria                   | Rhodobacterales                       |
| FJ497541 | uncultured bacterium                                                           | (14) | Alphaproteobacteria                   | Rhodobacterales                       |
| FN429823 | uncultured alpha proteobacterium                                               | (14) | Alphaproteobacteria                   | Alphaproteobacteria                   |
| HQ674273 | uncultured bacterium                                                           | (14) | Alphaproteobacteria                   | Alphaproteobacteria                   |
| HQ674323 | uncultured bacterium                                                           | (14) | Alphaproteobacteria                   | Alphaproteobacteria                   |
| HM798661 | uncultured Rickettsiales bacterium                                             | (14) | Rickettsiales                         | Rickettsiales                         |
| HQ433399 | uncultured alpha proteobacterium                                               | (14) | Alphaproteobacteria                   | Rhodobacterales                       |
| EU491911 | uncultured bacterium                                                           | (14) | Alphaproteobacteria                   | Rhodobacterales                       |
| EF644806 | uncultured bacterium                                                           | (14) | Alphaproteobacteria                   | Alphaproteobacteria                   |
| AB244979 | uncultured alpha proteobacterium                                               | (14) | Alphaproteobacteria                   | Rhodobacterales                       |
| HQ358399 | uncultured bacterium                                                           | (14) | Alphaproteobacteria                   | Rhodobacterales                       |
| FJ205314 | uncultured alpha proteobacterium                                               | (14) | Alphaproteobacteria                   | Rhodobacterales                       |
| FJ712457 | uncultured bacterium                                                           | (14) | Alphaproteobacteria                   | Rhodobacterales                       |
| FJ712530 | uncultured bacterium                                                           | (14) | Alphaproteobacteria                   | Rhodobacterales                       |
| EU286977 | uncultured bacterium                                                           | (14) | Alphaproteobacteria                   | Unclassified                          |
| FR683520 | uncultured marine bacterium                                                    | (14) | Alphaproteobacteria                   | Gammaproteobacteria                   |
| DQ270646 | uncultured bacterium                                                           | (14) | Alphaproteobacteria                   | Alphaproteobacteria                   |
| FJ557277 | uncultured bacterium                                                           | (14) | Betaproteobacteria                    | Betaproteobacteria                    |
| HQ828049 | uncultured bacterium                                                           | (14) | Betaproteobacteria                    | Ralstonia_Group                       |
| FJ593728 | uncultured bacterium                                                           | (14) | Betaproteobacteria                    | Ralstonia_Group                       |
| HM557329 | uncultured bacterium                                                           | (14) | Betaproteobacteria                    | Ralstonia_Group                       |
| HQ530524 | uncultured <i>Ralstonia</i> sp.                                                | (14) | Betaproteobacteria                    | Ralstonia_Group                       |
| FN658700 | delta proteobacterium ectosymbiont of <i>Rimicaris exoculata</i>               | (14) | Deltaproteobacteria                   | Desulfobulbaceae_1                    |
| AY771938 | uncultured delta proteobacterium                                               | (14) | Deltaproteobacteria                   | Desulfobacteraceae                    |
| AM268749 | uncultured prokaryote                                                          | (14) | Deltaproteobacteria                   | Desulfobulbaceae_1                    |
| AM268767 | uncultured prokaryote                                                          | (14) | Deltaproteobacteria                   | Desulfobulbaceae                      |
| AB264617 | <i>Desulfothermus okinawensis</i> JCM 13304                                    | (14) | <i>Desulfothermus okinawensis</i>     | <i>Desulfothermus okinawensis</i>     |
| EF644847 | uncultured bacterium                                                           | (14) | Deltaproteobacteria                   | Desulfobivriales                      |
| AF449229 | uncultured delta proteobacterium                                               | (14) | Deltaproteobacteria                   | Desulfobulbaceae                      |
| GQ348094 | uncultured delta proteobacterium                                               | (14) | Deltaproteobacteria                   | Unaffiliated_D4                       |
| HM799049 | uncultured SAR324 cluster bacterium                                            | (14) | Deltaproteobacteria                   | SAR324                                |
| AF449228 | uncultured delta proteobacterium                                               | (14) | Deltaproteobacteria                   | Desulfobulbaceae                      |
| FM863751 | uncultured gamma proteobacterium                                               | (14) | Zetaproteobacteria                    | Zetaproteobacteria                    |
| FJ001796 | uncultured bacterium                                                           | (14) | Zetaproteobacteria                    | Zetaproteobacteria                    |
| AB284833 | uncultured bacterium                                                           | (14) | Zetaproteobacteria                    | Zetaproteobacteria                    |
| AB284830 | uncultured bacterium                                                           | (15) | Zetaproteobacteria                    | Zetaproteobacteria                    |
| AB284834 | uncultured bacterium                                                           | (15) | Zetaproteobacteria                    | Zetaproteobacteria                    |
| AB284831 | uncultured bacterium                                                           | (15) | Zetaproteobacteria                    | Zetaproteobacteria                    |
| DQ832637 | uncultured bacterium                                                           | (15) | Zetaproteobacteria                    | Zetaproteobacteria                    |
| EF493243 | <i>Mariprofundus ferrooxydans</i> PV-1                                         | (15) | <i>Mariprofundus ferrooxydans</i>     | <i>Mariprofundus ferrooxydans</i>     |
| EF493244 | <i>Mariprofundus ferrooxydans</i>                                              | (15) | <i>Mariprofundus ferrooxydans</i>     | <i>Mariprofundus ferrooxydans</i>     |
| AJ309526 | Red Sea bacterium KT-ZK34                                                      | (15) | Zetaproteobacteria                    | Zetaproteobacteria                    |
| DQ832638 | uncultured bacterium                                                           | (15) | Zetaproteobacteria                    | Zetaproteobacteria                    |
| U15116   | hydrothermal vent eubacterium PVB_OTU_4                                        | (15) | Zetaproteobacteria                    | Zetaproteobacteria                    |
| AY197408 | uncultured proteobacterium                                                     | (15) | Zetaproteobacteria                    | Zetaproteobacteria                    |
| DQ832644 | uncultured bacterium                                                           | (15) | Zetaproteobacteria                    | Zetaproteobacteria                    |
| AB284832 | uncultured bacterium                                                           | (15) | Zetaproteobacteria                    | Zetaproteobacteria                    |
| EU386090 | uncultured bacterium                                                           | (16) | Deltaproteobacteria                   | SEEP-SRB1c                            |
| AF418173 | <i>Desulfococcus multivorans</i>                                               | (16) | <i>Desulfococcus multivorans</i>      | <i>Desulfococcus multivorans</i>      |
| AF328857 | <i>Olavus algarvensis</i> sulfate-reducing endosymbiont                        | (16) | Deltaproteobacteria                   | Desulfobacteraceae                    |
| EU385910 | uncultured bacterium                                                           | (16) | Deltaproteobacteria                   | Desulfobacterales                     |
| EU020016 | <i>Desulfobacterium anilini</i>                                                | (16) | <i>Desulfobacterium anilini</i>       | <i>Desulfobacterium anilini</i>       |
| EU386019 | uncultured bacterium                                                           | (16) | Deltaproteobacteria                   | Desulfobacterales_2                   |
| AB177158 | uncultured bacterium                                                           | (16) | Deltaproteobacteria                   | Desulfobacterales_2                   |
| X95181   | <i>Desulfocapsa thiozymogenes</i> DSM 7269                                     | (16) | <i>Desulfocapsa thiozymogenes</i>     | <i>Desulfocapsa thiozymogenes</i>     |
| X85131   | <i>Syntrophus buswellii</i>                                                    | (16) | <i>Syntrophus buswellii</i>           | <i>Syntrophus buswellii</i>           |
| AF357914 | <i>Desulfuromonas michiganensis</i>                                            | (16) | <i>Desulfuromonas michiganensis</i>   | <i>Desulfuromonas michiganensis</i>   |
| AF030438 | <i>Desulfomicrobium baculatum</i> DSM 4028                                     | (16) | <i>Desulfomicrobium baculatum</i>     | <i>Desulfomicrobium baculatum</i>     |
| M34113   | <i>Desulfovibrio desulfuricans</i> subsp. <i>desulfuricans</i> str. ATCC 27774 | (16) | <i>Desulfovibrio desulfuricans</i>    | <i>Desulfovibrio desulfuricans</i>    |
| AY344381 | uncultured bacterium                                                           | (16) | Gammaproteobacteria                   | Legionella_Group                      |
| AF150806 | <i>Methylomonas methanica</i>                                                  | (16) | <i>Methylomonas methanica</i>         | <i>Methylomonas methanica</i>         |
| AJ309564 | <i>Halomonas nitritophilus</i>                                                 | (16) | <i>Halomonas nitritophilus</i>        | <i>Halomonas nitritophilus</i>        |
| EF554889 | <i>Ralstonia</i> sp. HI3                                                       | (16) | <i>Ralstonia</i> sp.                  | <i>Ralstonia</i>                      |
| EU050751 | uncultured alpha proteobacterium                                               | (16) | Alphaproteobacteria                   | Rhodobacterales                       |
| AM696693 | <i>Rhodovulum marinum</i>                                                      | (16) | <i>Rhodovulum marinum</i>             | <i>Rhodovulum marinum</i>             |
| Y14308   | <i>Hyphomicrobium denitrificans</i>                                            | (16) | <i>Hyphomicrobium denitrificans</i>   | <i>Hyphomicrobium denitrificans</i>   |
| AF408954 | <i>Hyphomicrobium</i> sp. Elin112                                              | (16) | <i>Hyphomicrobium</i> sp.             | Hyphomicrobium                        |
| Y14302   | <i>Hyphomicrobium vulgare</i>                                                  | (16) | <i>Hyphomicrobium vulgare</i>         | <i>Hyphomicrobium vulgare</i>         |
| Y14313   | <i>Filomicrobium fusiforme</i>                                                 | (16) | <i>Pedomicrobium fusiforme</i>        | <i>Filomicrobium fusiforme</i>        |
| AY345494 | uncultured bacterium                                                           | (16) | Planctomycetales                      | Planctomycetales                      |
| EF421450 | <i>Pirellula</i> sp. OJF12                                                     | (16) | <i>Pirellula</i> sp.                  | <i>Pirellula</i> sp.                  |
| X62911   | <i>Planctomyces limnophilus</i> DSM 3776                                       | (16) | <i>Planctomyces limnophilus</i>       | <i>Planctomyces limnophilus</i>       |
| EU245434 | uncultured organism                                                            | (16) | WPS-1                                 | Planctomycetes                        |
| AB300069 | uncultured bacterium                                                           | (16) | WPS-1                                 | WPS1                                  |
| AJ966598 | uncultured bacterium                                                           | (16) | WPS-1                                 | WPS1                                  |
| EU385958 | uncultured bacterium                                                           | (16) | WPS-1                                 | WPS1                                  |
| AB177200 | uncultured bacterium                                                           | (16) | WPS-1                                 | WPS1                                  |
| EU385694 | uncultured bacterium                                                           | (16) | WPS-1                                 | WPS1                                  |
| AY093476 | uncultured bacterium                                                           | (16) | WPS-1                                 | WPS1                                  |
| EU385823 | uncultured bacterium                                                           | (16) | WPS-1                                 | WPS1                                  |
| EU385800 | uncultured bacterium                                                           | (16) | Planctomycetes                        | Planctomycetes                        |
| AJ250882 | anaerobic ammonium-oxidizing planctomycete KOLL2a                              | (16) | <i>Planctomyces anamox</i>            | <i>C. Kueningenia</i>                 |
| JQ889505 | <i>Candidatus Kueningenia stuttgartiensis</i>                                  | (16) | <i>C. Kueningenia stuttgartiensis</i> | <i>C. Kueningenia stuttgartiensis</i> |
| DQ811911 | uncultured Bacteroidetes bacterium                                             | (16) | Bacteroidetes                         | CFB                                   |
| AF029041 | benzene mineralizing consortium clone SB-5                                     | (16) | Bacteroidetes                         | CFB                                   |
| L35516   | <i>Acetivibrio cellulolyticus</i>                                              | (16) | <i>Acetivibrio cellulolyticus</i>     | <i>Acetivibrio cellulolyticus</i>     |
| AJ133496 | <i>Fusobacterium nucleatum</i> subsp. <i>nucleatum</i> ATCC 25586              | (16) | <i>Fusobacterium nucleatum</i>        | <i>Fusobacterium nucleatum</i>        |
| AF050099 | <i>Fusibacter paucivorans</i>                                                  | (16) | <i>Fusibacter paucivorans</i>         | <i>Fusibacter paucivorans</i>         |
| DQ296031 | <i>Clostridium tagluense</i>                                                   | (16) | <i>Clostridium tagluense</i>          | <i>Clostridium tagluense</i>          |
| DQ248294 | uncultured soil bacterium                                                      | (16) | Firmicutes                            | Firmicutes                            |
| X97099   | uncultured bacterium                                                           | (16) | TM6                                   | TM6                                   |
| EU358703 | uncultured bacterium                                                           | (16) | TM6                                   | Firmicutes                            |
| AB015269 | uncultured candidate division JS1 bacterium                                    | (16) | JS1                                   | JS1                                   |
| AJ555219 | uncultured candidate division JS1 bacterium                                    | (16) | JS1                                   | JS1                                   |
| EU385673 | uncultured bacterium                                                           | (16) | OP1                                   | HAG_OP1                               |
| AM712329 | uncultured candidate division OP1 bacterium                                    | (16) | OP1                                   | HAG_OP1                               |
| AY869683 | uncultured bacterium                                                           | (16) | GNS                                   | D1_Chloroflexi                        |
| EU385821 | uncultured bacterium                                                           | (16) | GNS                                   | D2_Chloroflexi                        |
| DQ811888 | uncultured Chloroflexi bacterium                                               | (16) | GNS                                   | D2_Chloroflexi                        |
| EU385875 | uncultured bacterium                                                           | (16) | GNS                                   | D2_Chloroflexi                        |
| AY093480 | uncultured bacterium                                                           | (16) | GNS                                   | D2_Chloroflexi                        |
| EU385681 | uncultured bacterium                                                           | (16) | GNS                                   | D2_Chloroflexi                        |
| EU037997 | uncultured bacterium                                                           | (16) | GNS                                   | D2_Chloroflexi                        |
| Z76678   | <i>Streptomyces coelicolor</i>                                                 | (16) | <i>Streptomyces coelicolor</i>        | <i>Streptomyces coelicolor</i>        |
| X87319   | Streptosporangiaceae                                                           | (16) | Actinobacteria                        | Streptosporangiaceae                  |
| X92361   | Geodermatophilus                                                               | (16) | Geodermatophilus sp.                  | <i>Geodermatophilus</i> sp.           |
| AF409007 | <i>Modestobacter</i> sp. Elin165                                               | (16) | <i>Modestobacter</i> sp.              | <i>Modestobacter</i> sp.              |
| EF125463 | uncultured bacterium                                                           | (16) | Acidobacteria                         | Acidobacteria                         |
| DQ351783 | uncultured Acidobacteriales bacterium                                          | (16) | Acidobacteria                         | Acidobacteria                         |
| EU386077 | uncultured bacterium                                                           | (16) | OP8                                   | OP8                                   |
| EU385676 | uncultured bacterium                                                           | (16) | OP8                                   | OP8                                   |
| EU385924 | uncultured bacterium                                                           | (16) | OP8                                   | OP8                                   |
| DQ811947 | uncultured Aminicenantes bacterium                                             | (16) | OP8                                   | OP8                                   |
| DQ811949 | uncultured Aminicenantes bacterium                                             | (16) | OP8                                   | OP8                                   |
| AF027088 | candidate division OP3 clone OPB2                                              | (16) | OP3                                   | Unclassified                          |
| EU385938 | uncultured bacterium                                                           | (16) | OP3                                   | OP3                                   |

|          |                                               |      |                                   |                                   |
|----------|-----------------------------------------------|------|-----------------------------------|-----------------------------------|
| X68464   | Actinomycetales                               | (17) | Acidobacterium - D1               | D1 Acidobacteria                  |
| Z73363   | uncultured bacterium                          | (17) | Acidobacterium - D1               | D1 Acidobacteria                  |
| Z73365   | uncultured bacterium                          | (17) | Acidobacterium - D1               | D1 Acidobacteria                  |
| Z73368   | uncultured bacterium                          | (17) | Acidobacterium - D1               | D1 Acidobacteria                  |
| Z73364   | uncultured bacterium                          | (17) | Acidobacterium - D1               | D1 Acidobacteria                  |
| U68659   | uncultured bacterium                          | (17) | Acidobacterium - D1               | D1 Acidobacteria                  |
| D26171   | <i>Acidobacterium capsulatum</i>              | (17) | <i>Acidobacterium capsulatum</i>  | <i>Acidobacterium capsulatum</i>  |
| X97101   | uncultured bacterium                          | (17) | Acidobacterium - D1               | D1 Acidobacteria                  |
| X97098   | uncultured bacterium                          | (17) | Acidobacterium - D1               | D1 Acidobacteria                  |
| AF047646 | uncultured eubacterium TRB82                  | (17) | Acidobacterium - D1               | D1 Acidobacteria                  |
| AF050548 | uncultured eubacterium WCHA2-13               | (17) | Acidobacterium - D1               | D1 Acidobacteria                  |
| U68612   | uncultured bacterium                          | (17) | Acidobacterium - D2               | D2 Acidobacteria                  |
| Y07646   | uncultured bacterium DA052                    | (17) | Acidobacterium - D2               | D2 Acidobacteria                  |
| X97097   | uncultured bacterium                          | (17) | <i>Acidobacterium</i>             | Acidobacteria                     |
| X68466   | Actinomycetales                               | (17) | Acidobacterium - D3               | D3 Acidobacteria                  |
| X68468   | Actinomycetales                               | (17) | Acidobacterium - D3               | D3 Acidobacteria                  |
| U68648   | uncultured bacterium                          | (17) | Acidobacterium - D3               | D3 Acidobacteria                  |
| X68467   | Actinomycetales                               | (17) | Acidobacterium - D3               | D3 Acidobacteria                  |
| AF013515 | uncultivated soil bacterium clone C002        | (17) | Acidobacterium - D3               | D3 Acidobacteria                  |
| AF027004 | unidentified Acidobacterium group OPB3        | (17) | Acidobacterium - D3               | D3 Acidobacteria                  |
| AF013550 | uncultivated soil bacterium clone S023        | (17) | Acidobacterium - D4               | D4 Acidobacteria                  |
| Z95722   | uncultured Acidobacteria bacterium            | (17) | Acidobacterium - D4               | D4 Acidobacteria                  |
| Z95711   | uncultured Acidobacteria bacterium            | (17) | Acidobacterium - D4               | D4 Acidobacteria                  |
| AF013554 | uncultivated soil bacterium clone S027        | (17) | Acidobacterium - D4               | D4 Acidobacteria                  |
| Z95720   | uncultured Acidobacteria bacterium            | (17) | Acidobacterium - D4               | D4 Acidobacteria                  |
| AF013530 | uncultivated soil bacterium clone C105        | (17) | Acidobacterium - D4               | D4 Acidobacteria                  |
| Z95709   | uncultured Acidobacteria bacterium            | (17) | Acidobacterium - D4               | D4 Acidobacteria                  |
| U68646   | uncultured bacterium                          | (17) | Acidobacterium - D4               | D4 Acidobacteria                  |
| AF013560 | uncultivated soil bacterium clone S111        | (17) | Acidobacterium - D4               | D4 Acidobacteria                  |
| Z95708   | uncultured Acidobacteria bacterium            | (17) | Acidobacterium - D4               | D4 Acidobacteria                  |
| U68644   | uncultured bacterium                          | (17) | Acidobacterium - D4               | D4 Acidobacteria                  |
| U68625   | uncultured bacterium                          | (17) | Acidobacterium - D5               | D5 Acidobacteria                  |
| Z95707   | uncultured Acidobacteria bacterium            | (17) | Acidobacterium - D5               | D5 Acidobacteria                  |
| Z95732   | uncultured Acidobacteria bacterium            | (17) | Acidobacterium - D6               | D6 Acidobacteria                  |
| Y07586   | uncultured bacterium DA023                    | (17) | Acidobacterium - D6               | D6 Acidobacteria                  |
| AF013534 | uncultivated soil bacterium clone C112        | (17) | Acidobacterium - D6               | D6 Acidobacteria                  |
| U68489   | unidentified marine eubacterium               | (17) | Acidobacterium - D6               | D6 Acidobacteria                  |
| AF013527 | uncultivated soil bacterium clone C028        | (17) | Acidobacterium - D6               | D6 Acidobacteria                  |
| Z95717   | uncultured Acidobacteria bacterium            | (17) | Acidobacterium - D6               | D6 Acidobacteria                  |
| Z95721   | uncultured Acidobacteria bacterium            | (17) | Acidobacterium - D6               | D6 Acidobacteria                  |
| Z95719   | uncultured Acidobacteria bacterium            | (17) | Acidobacterium - D6               | D6 Acidobacteria                  |
| Y12597   | uncultured bacterium DA008                    | (17) | Acidobacterium - D6               | D6 Acidobacteria                  |
| Z95716   | uncultured Acidobacteria bacterium            | (17) | Acidobacterium - D6               | D6 Acidobacteria                  |
| AF013567 | uncultivated soil bacterium clone S125        | (17) | Acidobacterium - D6               | D6 Acidobacteria                  |
| Z95733   | uncultured Acidobacteria bacterium            | (17) | Acidobacterium - D6               | D6 Acidobacteria                  |
| AJ001424 | uncultured bacterium                          | (17) | Acidobacterium - D6               | D6 Acidobacteria                  |
| Z95713   | uncultured Acidobacteria bacterium            | (17) | Acidobacterium - D7               | Acidobacteria                     |
| Z95729   | uncultured Acidobacteria bacterium            | (17) | Acidobacterium - D7               | Acidobacteria                     |
| Z95718   | uncultured Acidobacteria bacterium            | (17) | Acidobacterium - D7               | Acidobacteria                     |
| AF050562 | uncultured eubacterium WCHB1-05               | (17) | Chloroflexi - D1                  | D1 Chloroflexi                    |
| AF050564 | uncultured eubacterium WCHB1-43               | (17) | Chloroflexi - D1                  | D1 Chloroflexi                    |
| AF050566 | uncultured eubacterium WCHB1-62               | (17) | Chloroflexi - D1                  | D1 Chloroflexi                    |
| Z94009   | uncultured bacterium                          | (17) | Chloroflexi - D1                  | D1 Chloroflexi                    |
| AF050569 | uncultured eubacterium WCHB1-31               | (17) | Chloroflexi - D1                  | D1 Chloroflexi                    |
| U62857   | unidentified eubacterium RB41                 | (17) | Chloroflexi - D1                  | D1 Chloroflexi                    |
| AF050568 | uncultured eubacterium WCHB1-63               | (17) | Chloroflexi - D1                  | D1 Chloroflexi                    |
| AF027036 | unidentified green non-sulfur bacterium OPB65 | (17) | Chloroflexi - D1                  | D1 Chloroflexi                    |
| AF027043 | unidentified green non-sulfur bacterium OPB9  | (17) | Chloroflexi - D1                  | D1 Chloroflexi                    |
| AF050571 | uncultured eubacterium WCHB1-50               | (17) | Chloroflexi - D1                  | D1 Chloroflexi                    |
| AF027031 | unidentified green non-sulfur bacterium OPB12 | (17) | Chloroflexi - D1                  | D1 Chloroflexi                    |
| AF005749 | uncultured eubacterium H1.43.f                | (17) | Chloroflexi - D1                  | D1 Chloroflexi                    |
| AF005748 | uncultured eubacterium H1.4.f                 | (17) | Chloroflexi - D2                  | D2 Chloroflexi                    |
| AF005750 | uncultured eubacterium H3.93                  | (17) | Chloroflexi - D2                  | D2 Chloroflexi                    |
| AF005745 | uncultured eubacterium t0.6.f                 | (17) | Chloroflexi - D2                  | D2 Chloroflexi                    |
| AF005746 | uncultured eubacterium t0.8.f                 | (17) | Chloroflexi - D2                  | D2 Chloroflexi                    |
| U62842   | unidentified eubacterium RB21                 | (17) | Chloroflexi                       | Chloroflexi                       |
| M34116   | <i>Chloroflexus aurantiacus</i>               | (17) | <i>Chloroflexus aurantiacus</i>   | <i>Chloroflexus aurantiacus</i>   |
| B32255   | <i>Chloroflexus aggregans</i>                 | (17) | <i>Chloroflexus aggregans</i>     | <i>Chloroflexus aggregans</i>     |
| L04703   | <i>Eubacterium</i> sp.                        | (17) | <i>Eubacterium</i> sp.            | D3 Chloroflexi                    |
| L04675   | <i>Heliothrix oregonensis</i>                 | (17) | <i>Heliothrix oregonensis</i>     | <i>Heliothrix oregonensis</i>     |
| M62774   | <i>Eubacterium</i> sp.                        | (17) | <i>Eubacterium</i> sp.            | D3 Chloroflexi                    |
| M34117   | <i>Herpetosiphon aurantiacus</i>              | (17) | <i>Herpetosiphon aurantiacus</i>  | <i>Herpetosiphon aurantiacus</i>  |
| X53210   | <i>Sphaerobacter thermophilus</i> DSM 20745   | (17) | <i>Sphaerobacter thermophilus</i> | <i>Sphaerobacter thermophilus</i> |
| M34115   | <i>Thermomicrobium roseum</i>                 | (17) | <i>Thermomicrobium roseum</i>     | <i>Thermomicrobium roseum</i>     |
| U62827   | unidentified eubacterium RB03                 | (17) | Chloroflexi                       | Chloroflexi                       |
| U68589   | uncultured bacterium                          | (17) | Chloroflexi                       | Chloroflexi                       |
| U20797   | unidentified eubacterium clone SAR202         | (17) | Chloroflexi - D4                  | D4 Chloroflexi                    |
| U20798   | unidentified eubacterium clone SAR307         | (17) | Chloroflexi - D4                  | D4 Chloroflexi                    |
| AF005747 | uncultured eubacterium H1.2.f                 | (17) | Chloroflexi - D4                  | D4 Chloroflexi                    |
| AF027026 | candidate division OP11 clone OP5128          | (17) | OP11 - D1                         | OP11_D1                           |
| AF047559 | Microgenomates                                | (17) | OP11 - D1                         | OP11_D1                           |
| AF047557 | Microgenomates                                | (17) | OP11 - D1                         | OP11_D1                           |
| AF047560 | Microgenomates                                | (17) | OP11 - D1                         | OP11_D1                           |
| AF027030 | candidate division OP11 clone OPB92           | (17) | OP11 - D1                         | OP11_D1                           |
| AF047566 | Microgenomates                                | (17) | OP11 - D1                         | OP11_D1                           |
| AF047567 | Microgenomates                                | (17) | OP11 - D1                         | OP11_D1                           |
| AF047564 | Microgenomates                                | (17) | OP11 - D1                         | OP11_D1                           |
| AF047568 | Microgenomates                                | (17) | OP11 - D1                         | OP11_D1                           |
| AF047569 | Microgenomates                                | (17) | OP11 - D1                         | OP11_D1                           |
| AF047570 | Microgenomates                                | (17) | OP11 - D1                         | OP11_D1                           |
| AF047571 | Microgenomates                                | (17) | OP11 - D1                         | OP11_D1                           |
| AF047572 | Microgenomates                                | (17) | OP11 - D1                         | OP11_D1                           |
| AF050601 | uncultured eubacterium WCHA1-20               | (17) | OP11 - D2                         | OP11_D2                           |
| AF050602 | uncultured eubacterium WCHA1-24               | (17) | OP11 - D2                         | OP11_D2                           |
| AF050600 | uncultured eubacterium WCHB1-07               | (17) | OP11 - D2                         | OP11_D2                           |
| AF050606 | uncultured eubacterium WCHB1-64               | (17) | OP11                              | OP11                              |
| AF050607 | uncultured eubacterium WCHA1-11               | (17) | OP11                              | OP11                              |
| AF050603 | uncultured eubacterium WCHB1-11               | (17) | OP11 - D3                         | OP11_D3                           |
| AF050604 | uncultured eubacterium WCHA1-09               | (17) | OP11 - D3                         | OP11_D3                           |
| AF050605 | uncultured eubacterium WCHB1-56               | (17) | OP11 - D3                         | OP11_D3                           |
| U68664   | uncultured bacterium                          | (17) | OP11 - D3                         | OP11_D3                           |
| AF047573 | Microgenomates                                | (17) | OP11 - D3                         | OP11                              |
| AF050609 | uncultured eubacterium WCHA2-26               | (17) | OP11 - D4                         | SR1                               |
| AF047574 | Microgenomates                                | (17) | OP11 - D5                         | OD1                               |
| AF047562 | Microgenomates                                | (17) | OP11 - D5                         | OD1                               |
| AF027027 | candidate division OP11 clone OP5136          | (17) | OP11 - D5                         | OD1                               |
| AF050608 | uncultured eubacterium WCHA1-16               | (17) | OP11 - D5                         | OD1                               |
| AF050621 | uncultured eubacterium WCHA2-01               | (17) | OP11 - D5                         | OD1                               |
| Z94005   | uncultured bacterium                          | (17) | Verrucomicrobia - D1              | Verruco_D1a                       |
| X90515   | <i>Verrucomicrobium spinosum</i>              | (17) | <i>Verrucomicrobium spinosum</i>  | <i>Verrucomicrobium spinosum</i>  |
| U68652   | uncultured bacterium                          | (17) | Verrucomicrobia - D2              | Verruco_D2                        |
| X64381   | uncultured bacterium                          | (17) | Verrucomicrobia - D2              | Verruco_D2                        |
| X64374   | uncultured bacterium                          | (17) | Verrucomicrobia - D2              | Verruco_D2                        |
| X64382   | uncultured bacterium                          | (17) | Verrucomicrobia - D2              | Verruco_D2                        |
| U62853   | unidentified eubacterium RB35                 | (17) | Verrucomicrobia - D2              | Verruco_D2                        |
| AF013522 | uncultivated soil bacterium clone C019        | (17) | Verrucomicrobia - D2              | Verruco_D2                        |
| X64380   | uncultured bacterium                          | (17) | Verrucomicrobia - D2              | Verruco_D2                        |

|           |                                                               |      |                                    |                                            |
|-----------|---------------------------------------------------------------|------|------------------------------------|--------------------------------------------|
| AF050561  | uncultured eubacterium WCHD3-88                               | (17) | Verrucomicrobia - D2               | Verruco_D2                                 |
| U68687    | uncultured bacterium P71                                      | (17) | Verrucomicrobia - D3               | Verruco_D3                                 |
| U62826    | unidentified eubacterium RB02                                 | (17) | Verrucomicrobia - D3               | Verruco_D3                                 |
| U62825    | unidentified eubacterium RB01                                 | (17) | Verrucomicrobia - D3               | Verruco_D3                                 |
| U62837    | unidentified eubacterium RB14                                 | (17) | Verrucomicrobia - D3               | Verruco_D3                                 |
| AF027005  | unidentified Verrucomicrobium group OPB35                     | (17) | Verrucomicrobia - D3               | Verruco_D3                                 |
| X99390    | <i>Opiritus</i> sp. VeGlc2                                    | (17) | <i>Opiritus</i> sp.                | <i>Opiritus</i> sp.                        |
| X97110    | uncultured bacterium TM18                                     | (17) | Verrucomicrobia - D4               | Verruco_D4                                 |
| AF050557  | uncultured eubacterium WCHA1-33                               | (17) | Verrucomicrobia - D5               | Verruco_D5                                 |
| AF050558  | uncultured eubacterium WCHA1-80                               | (17) | Verrucomicrobia - D5               | Verruco_D5                                 |
| AF050559  | uncultured eubacterium WCHB1-25                               | (17) | Verrucomicrobia - D5               | Verruco_D5                                 |
| AF050560  | uncultured eubacterium WCHB1-41                               | (17) | Verrucomicrobia - D5               | Verruco_D5                                 |
| M83548    | <i>Aquifex pyrophilus</i>                                     | (18) | <i>Aquifex pyrophilus</i>          | <i>Aquifex pyrophilus</i>                  |
| AB094871  | uncultured bacterium                                          | (18) | NT-B3                              | D2_Chloroflexi                             |
| AB094808  | uncultured bacterium                                          | (18) | NT-B3                              | D2_Chloroflexi                             |
| AY093456  | uncultured bacterium                                          | (18) | NT-B3                              | D2_Chloroflexi                             |
| AF004928  | <i>Dehalococcoides mccartyi</i>                               | (18) | <i>Dehalococcoides ethenogenes</i> | <i>Dehalococcoides ethenogenes</i>         |
| AB094814  | uncultured bacterium                                          | (18) | NT-B4                              | D2_Chloroflexi                             |
| AB094803  | uncultured bacterium                                          | (18) | NT-B4                              | D2_Chloroflexi                             |
| AB094957  | uncultured bacterium                                          | (18) | NT-B4                              | D2_Chloroflexi                             |
| AB094949  | uncultured bacterium                                          | (18) | NT-B4                              | D2_Chloroflexi                             |
| AY093464  | uncultured bacterium                                          | (18) | NT-B4                              | D2_Chloroflexi                             |
| AB094959  | uncultured bacterium                                          | (18) | NT-B4                              | D2_Chloroflexi                             |
| AB094807  | uncultured bacterium                                          | (18) | NT-B4                              | D2_Chloroflexi                             |
| AB094829  | uncultured bacterium                                          | (18) | NT-B4                              | D2_Chloroflexi                             |
| AB094802  | uncultured bacterium                                          | (18) | OP9                                | JS1                                        |
| AB094816  | uncultured bacterium                                          | (18) | OP9                                | JS1                                        |
| AF029050  | benzene mineralizing consortium clone SB-45                   | (18) | OP9                                | JS1                                        |
| AB094943  | uncultured bacterium                                          | (18) | OP9                                | JS1                                        |
| AB094811  | uncultured bacterium                                          | (18) | OP9                                | JS1                                        |
| AB069805  | uncultured bacterium                                          | (18) | OP9                                | JS1                                        |
| AY093469  | uncultured candidate division JS1 bacterium                   | (18) | OP9                                | JS1                                        |
| AB094956  | uncultured bacterium                                          | (18) | OP9                                | JS1                                        |
| AB094967  | uncultured bacterium                                          | (18) | OP9                                | JS1                                        |
| AF154106  | uncultured hydrocarbon seep bacterium GCA025                  | (18) | OP9                                | JS1                                        |
| AB525440  | uncultured bacterium                                          | /    | /                                  | Unaffiliated_D2                            |
| JN534584  | uncultured organism                                           | /    | /                                  | Unaffiliated_D2                            |
| FN550086  | uncultured bacterium                                          | /    | /                                  | Unaffiliated_D2                            |
| F901574   | uncultured delta proteobacterium                              | /    | /                                  | Deltaproteobacteria                        |
| AY547836  | uncultured bacterium                                          | /    | /                                  | Unaffiliated_D3                            |
| JD817389  | uncultured bacterium                                          | /    | /                                  | NTB2                                       |
| AY093475  | uncultured bacterium                                          | /    | /                                  | NTB2                                       |
| AJ290829  | <i>Chlorobium vibrioforme f. thiosulfatophilum</i>            | /    | /                                  | <i>Chlorobium vibrioforme</i>              |
| AF170103  | <i>Chloroherpeton thalassium</i> ATCC 35110                   | /    | /                                  | <i>Chloroherpeton thalassium</i>           |
| JN591925  | uncultured SAR406 cluster bacterium                           | /    | /                                  | SAR406                                     |
| GQ337325  | uncultured SAR406 cluster bacterium                           | /    | /                                  | SAR406                                     |
| JN860378  | uncultured zeta proteobacterium                               | /    | /                                  | Zetaproteobacteria                         |
| HQ206656  | zeta proteobacterium enrichment culture clone JMM_Dock-D2b-C6 | /    | /                                  | Zetaproteobacteria                         |
| JF344287  | uncultured delta proteobacterium                              | /    | /                                  | Unaffiliated_D4                            |
| GU230395  | uncultured delta proteobacterium                              | /    | /                                  | Unaffiliated_D4                            |
| EU373896  | uncultured delta proteobacterium                              | /    | /                                  | Unaffiliated_D4                            |
| EU025028  | <i>Deinococcus wulumuqiensis</i>                              | /    | /                                  | <i>Deinococcus wulumuqiensis</i>           |
| FJ655840  | <i>Deinococcus radiodurans</i>                                | /    | /                                  | <i>Deinococcus radiodurans</i>             |
| HQ616358  | <i>Fusobacterium</i> sp. ACB2                                 | /    | /                                  | <i>Fusobacterium</i>                       |
| M58685    | <i>Fusobacterium simiae</i>                                   | /    | /                                  | <i>Fusobacterium simiae</i>                |
| M58680    | <i>Fusobacterium mortiferum</i>                               | /    | /                                  | <i>Fusobacterium mortiferum</i>            |
| NR_Q25305 | <i>Stenotrophomonas nitritireducens</i>                       | /    | /                                  | <i>Stenotrophomonas nitritireducens</i>    |
| FR865038  | <i>Nitrospina gracilis</i> 3/211                              | /    | /                                  | <i>Nitrospina gracilis</i>                 |
| L35504    | <i>Nitrospina gracilis</i> Nb-211                             | /    | /                                  | <i>Nitrospina gracilis</i>                 |
| L35503    | <i>Nitrospina gracilis</i>                                    | /    | /                                  | <i>Nitrospina gracilis</i>                 |
| AM997762  | uncultured deep-sea bacterium                                 | /    | /                                  | Nitrospinaceae                             |
| AM997926  | uncultured deep-sea bacterium                                 | /    | /                                  | Nitrospinaceae                             |
| GQ246356  | uncultured bacterium                                          | /    | /                                  | Unaffiliated_D1                            |
| FM242272  | uncultured delta proteobacterium                              | /    | /                                  | Unaffiliated_D1                            |
| EU266913  | uncultured Armatimonadetes bacterium                          | /    | /                                  | OP10                                       |
| EU266864  | uncultured Armatimonadetes bacterium                          | /    | /                                  | OP10                                       |
| JX221951  | uncultured bacterium                                          | /    | /                                  | OP10                                       |
| FN550019  | uncultured bacterium                                          | /    | /                                  | Unaffiliated_D2                            |
| HQ588614  | uncultured bacterium                                          | /    | /                                  | Unaffiliated_D2                            |
| FM165274  | uncultured bacterium                                          | /    | /                                  | Unaffiliated_D2                            |
| FN553950  | uncultured sediment bacterium                                 | /    | /                                  | Unaffiliated_D2                            |
| HM041949  | uncultured candidate division OP9 bacterium                   | /    | /                                  | OP9                                        |
| AF027086  | candidate division OP9 clone OPB72                            | /    | /                                  | OP9                                        |
| HM041950  | uncultured candidate division OP9 bacterium                   | /    | /                                  | OP9                                        |
| CU918804  | uncultured bacterium                                          | /    | /                                  | OP9                                        |
| DQ351811  | uncultured actinobacterium                                    | /    | /                                  | Gemmati_D4                                 |
| FJ358901  | uncultured actinobacterium                                    | /    | /                                  | Gemmati_D4                                 |
| NR_Q27529 | <i>Gemmatimonas aurantiaca</i> T-27                           | /    | /                                  | <i>Gemmatimonas aurantiaca</i>             |
| AB694246  | uncultured bacterium                                          | /    | /                                  | Gemmati_D3                                 |
| AJ969468  | uncultured candidate division TM7 bacterium                   | /    | /                                  | PCGroup_D1                                 |
| FJ792273  | uncultured bacterium                                          | /    | /                                  | PCGroup_D1                                 |
| JX294352  | GN02 bacterium oral taxon 871                                 | /    | /                                  | PCGroup_D1                                 |
| JN713493  | GN02 bacterium canine oral taxon 323                          | /    | /                                  | PCGroup_D1                                 |
| AM268242  | uncultured KB1 group bacterium                                | /    | /                                  | KB1                                        |
| HQ658734  | uncultured KB1 group bacterium                                | /    | /                                  | KB1                                        |
| AB722130  | uncultured bacterium                                          | /    | /                                  | HAG_OP1                                    |
| FJ535351  | uncultured bacterium                                          | /    | /                                  | HAG_OP1                                    |
| NR_Q41318 | <i>Thermodesulfobivria yellowstonii</i>                       | /    | /                                  | <i>Thermodesulfobivria yellowstonii</i>    |
| AF402981  | uncultured <i>Nitrospira</i> sp.                              | /    | /                                  | <i>Nitrospira</i>                          |
| NR_Q41317 | <i>Thermodesulfobivria thiophilus</i>                         | /    | /                                  | <i>Thermodesulfobivria thiophilus</i>      |
| JD346739  | <i>Thermomicrobium roseum</i>                                 | /    | /                                  | <i>Thermomicrobium roseum</i>              |
| NR_Q42118 | <i>Sphaerobacter thermophilus</i>                             | /    | /                                  | <i>Sphaerobacter thermophilus</i>          |
| LU9660    | <i>Thermus thermophilus</i>                                   | /    | /                                  | <i>Thermus flavus</i>                      |
| NR_Q26416 | <i>Deinococcus murrayi</i>                                    | /    | /                                  | <i>Deinococcus murrayi</i>                 |
| NR_Q26400 | <i>Deinococcus proteolyticus</i> MRP                          | /    | /                                  | <i>Deinococcus proteolyticus</i>           |
| NR_Q28811 | <i>Thermodesulfobacterium thermophilum</i>                    | /    | /                                  | <i>Thermodesulfobacterium thermophilum</i> |
| NR_Q41847 | <i>Thermodesulfobacterium commune</i> DSM 2178                | /    | /                                  | <i>Thermodesulfobacterium commune</i>      |
| DQ369742  | uncultured bacterium                                          | (19) | NC10 - a                           | NC10_a                                     |
| EU808626  | uncultured bacterium                                          | (19) | NC10 - a                           | NC10_a                                     |
| DQ837259  | uncultured Firmicutes bacterium                               | (19) | NC10 - a                           | NC10_a                                     |
| DQ837241  | uncultured Firmicutes bacterium                               | (19) | NC10 - a                           | NC10_a                                     |
| DQ837250  | uncultured Firmicutes bacterium                               | (19) | NC10 - a                           | NC10_a                                     |
| AF351217  | uncultured bacterium                                          | (19) | NC10 - a                           | NC10_a                                     |
| AF351214  | uncultured bacterium                                          | (19) | NC10 - a                           | NC10_a                                     |
| AB116934  | uncultured bacterium                                          | (19) | NC10 - a                           | NC10_a                                     |
| AB198831  | uncultured bacterium                                          | (19) | NC10 - a                           | NC10_a                                     |
| DQ664101  | uncultured bacterium                                          | (19) | NC10 - a                           | NC10_a                                     |
| AF529103  | uncultured Gram-positive bacterium                            | (19) | NC10 - a                           | NC10_a                                     |
| EU335185  | uncultured bacterium                                          | (19) | NC10 - b                           | NC10_b                                     |
| EU335192  | uncultured bacterium                                          | (19) | NC10 - b                           | NC10_b                                     |
| AY375087  | uncultured bacterium                                          | (19) | NC10 - b                           | Unaffiliated_D4                            |
| AB286307  | uncultured Acidobacteria bacterium                            | (19) | NC10 - b                           | NC10_b                                     |
| EF667810  | uncultured bacterium                                          | (19) | NC10 - b                           | NC10_b                                     |
| AJ519650  | uncultured bacterium                                          | (19) | NC10 - b                           | NC10_b                                     |
| AJ519670  | uncultured bacterium                                          | (19) | NC10 - b                           | NC10_b                                     |
| EU335172  | uncultured bacterium                                          | (19) | NC10 - b                           | NC10_b                                     |
| EF492972  | uncultured bacterium                                          | (19) | NC10 - b                           | NC10_b                                     |

|           |                                                 |      |                                         |                                         |
|-----------|-------------------------------------------------|------|-----------------------------------------|-----------------------------------------|
| EF66757   | uncultured bacterium                            | (19) | NC10 - b                                | NC10_b                                  |
| AB426199  | uncultured bacterium                            | (19) | NC10 - b                                | NC10_b                                  |
| AB426228  | uncultured bacterium                            | (19) | NC10 - b                                | NC10_b                                  |
| AB426238  | uncultured bacterium                            | (19) | NC10 - b                                | NC10_b                                  |
| EF392983  | uncultured bacterium                            | (19) | NC10 - b                                | NC10_b                                  |
| DQ1165096 | uncultured bacterium                            | (19) | NC10 - b                                | NC10_b                                  |
| DQ906843  | uncultured bacterium                            | (19) | NC10 - c                                | NC10_c                                  |
| DQ906846  | uncultured bacterium                            | (19) | NC10 - c                                | NC10_c                                  |
| DQ906859  | uncultured bacterium                            | (19) | NC10 - c                                | NC10_c                                  |
| DQ906870  | uncultured bacterium                            | (19) | NC10 - c                                | NC10_c                                  |
| AB179508  | uncultured bacterium                            | (19) | NC10 - c                                | NC10_c                                  |
| AB179505  | uncultured bacterium                            | (19) | NC10                                    | NC_10                                   |
| AY225657  | uncultured low G+C Gram-positive bacterium      | (19) | NC10 - d                                | NC10_d                                  |
| EF491532  | uncultured bacterium                            | (19) | NC10 - d                                | NC10_d                                  |
| EU048615  | uncultured bacterium                            | (19) | NC10 - d                                | NC10_d                                  |
| EU373968  | uncultured bacterium                            | (19) | NC10 - d                                | NC10_d                                  |
| EU491416  | uncultured bacterium                            | (19) | NC10 - d                                | NC10_d                                  |
| AY186072  | uncultured bacterium                            | (19) | NC10 - d                                | NC10_d                                  |
| AF317743  | unidentified bacterium wb1_A12                  | (19) | NC10 - d                                | NC10_d                                  |
| AF317784  | unidentified bacterium wb1_D02                  | (19) | NC10 - d                                | NC10_d                                  |
| AM991185  | uncultured bacterium                            | (19) | NC10 - d                                | NC10_d                                  |
| EU491462  | uncultured bacterium                            | (19) | NC10 - d                                | NC10_d                                  |
| AJ519669  | uncultured bacterium                            | (19) | NC10 - d                                | NC10_d                                  |
| AY177763  | uncultured Gram-positive bacterium              | (19) | NC10 - d                                | NC10_d                                  |
| EU335141  | uncultured bacterium                            | (19) | NC10 - d                                | NC10_d                                  |
| EU335143  | uncultured bacterium                            | (19) | NC10 - d                                | NC10_d                                  |
| AF529101  | uncultured Gram-positive bacterium              | (19) | NC10 - d                                | NC10_d                                  |
| U60015    | <i>Prostheco bacter fusiformis</i>              | (20) | <i>Prostheco bacter fusiformis</i>      | <i>Prostheco bacter fusiformis</i>      |
| U60012    | <i>Prostheco bacter dejongei</i>                | (20) | <i>Prostheco bacter dejongei</i>        | <i>Prostheco bacter dejongei</i>        |
| U60014    | <i>Prostheco bacter debontii</i>                | (20) | <i>Prostheco bacter debontii</i>        | <i>Prostheco bacter debontii</i>        |
| U60013    | <i>Prostheco bacter vanneervenii</i>            | (20) | <i>Prostheco bacter vanneervenii</i>    | <i>Prostheco bacter vanneervenii</i>    |
| AJ401130  | uncultured verrucomicrobium DEV179              | (20) | Verrucomicrobia - D1                    | Verruco_D1a                             |
| AJ401106  | uncultured verrucomicrobium DEV006              | (20) | Verrucomicrobia - D1                    | Verruco_D1a                             |
| AJ401104  | uncultured verrucomicrobium DEV003              | (20) | Verrucomicrobia - D1                    | Verruco_D1a                             |
| AF234742  | uncultured sludge bacterium A21                 | (20) | Verrucomicrobia - D1                    | Verruco_D1a                             |
| AF234714  | uncultured sludge bacterium A38                 | (20) | Verrucomicrobia - D1                    | Verruco_D1a                             |
| AJ401116  | uncultured verrucomicrobium DEV035              | (20) | Verrucomicrobia - D1                    | Verruco_D1b                             |
| AJ401108  | uncultured verrucomicrobium DEV009              | (20) | Verrucomicrobia - D1                    | Verruco_D1b                             |
| AY028220  | uncultured Verrucomicrobia bacterium            | (20) | Verrucomicrobia - D1                    | Verruco_D1b                             |
| AJ401117  | uncultured verrucomicrobium DEV019              | (20) | Verrucomicrobia - D1                    | Verruco_D1b                             |
| AJ401133  | uncultured verrucomicrobium DEV021              | (20) | Verrucomicrobia - D1                    | Verruco_D1b                             |
| AJ401107  | uncultured verrucomicrobium DEV007              | (20) | Verrucomicrobia - D1                    | Verruco_D1b                             |
| AJ401105  | uncultured verrucomicrobium DEV005              | (20) | Verrucomicrobia - D1                    | Verruco_D1b                             |
| AF316731  | uncultured Crater Lake bacterium CL500-85       | (20) | Verrucomicrobia - D1                    | Verruco_D1b                             |
| AJ441222  | uncultured Verrucomicrobia bacterium            | (20) | Verrucomicrobia - D1                    | Verruco_D1b                             |
| AF513965  | uncultured Verrucomicrobia bacterium            | (20) | Verrucomicrobia - D1                    | Verruco_D1b                             |
| AJ441243  | uncultured Verrucomicrobia bacterium            | (20) | Verrucomicrobia - D1                    | Verruco_D1b                             |
| AJ401123  | uncultured verrucomicrobium DEV031              | (20) | Verrucomicrobia - D1                    | Verruco_D1b                             |
| U51864    | unidentified eubacterium EA25                   | (20) | Verrucomicrobia - D2                    | Verruco_D2                              |
| Y07576    | uncultured bacterium DA101                      | (20) | Verrucomicrobia - D2                    | Verruco_D2                              |
| AJ244308  | uncultured bacterium Ri26E                      | (20) | Verrucomicrobia - D2                    | Verruco_D2                              |
| AJ244309  | uncultured bacterium Ri26E2                     | (20) | Verrucomicrobia - D2                    | Verruco_D2                              |
| AJ289992  | uncultured bacterium FukuN18                    | (20) | Verrucomicrobia - D2                    | Verruco_D2                              |
| AJ289983  | uncultured bacterium FukuN106                   | (20) | Verrucomicrobia - D2                    | Verruco_D2                              |
| AF009975  | unidentified eubacterium LD29                   | (20) | Verrucomicrobia - D2                    | Verruco_D2                              |
| AF217461  | Candidatus <i>Xiphinematobacter rivesi</i>      | (20) | <i>C. Xiphinematobacter rivesi</i>      | <i>C. Xiphinematobacter rivesi</i>      |
| AF217460  | Candidatus <i>Xiphinematobacter americani</i>   | (20) | <i>C. Xiphinematobacter americani</i>   | <i>C. Xiphinematobacter americani</i>   |
| AF217462  | Candidatus <i>Xiphinematobacter brevicollis</i> | (20) | <i>C. Xiphinematobacter brevicollis</i> | <i>C. Xiphinematobacter brevicollis</i> |
| AF009974  | unidentified eubacterium LD19                   | (20) | Verrucomicrobia                         | Verruco_D3                              |
| AF465651  | uncultured Verrucomicrobia bacterium            | (20) | Verrucomicrobia - D3                    | Verruco_D3                              |
| AF445718  | uncultured Verrucomicrobia bacterium            | (20) | Verrucomicrobia - D3                    | Verruco_D3                              |
| AF234711  | uncultured sludge bacterium H2                  | (20) | Verrucomicrobia - D3                    | Verruco_D3                              |
| AJ401132  | uncultured verrucomicrobium DEV114              | (20) | Verrucomicrobia - D3                    | Verruco_D3                              |
| AF351215  | uncultured Verrucomicrobia bacterium            | (20) | Verrucomicrobia - D3                    | Verruco_D3                              |
| AJ401128  | uncultured verrucomicrobium DEV020              | (20) | Verrucomicrobia - D3                    | Verruco_D3                              |
| AF316730  | uncultured Crater Lake bacterium CL120-133      | (20) | Verrucomicrobia - D3                    | Verruco_D3                              |
| AJ401131  | uncultured verrucomicrobium DEV064              | (20) | Verrucomicrobia - D3                    | Verruco_D3                              |
| AJ401114  | uncultured verrucomicrobium DEV059              | (20) | Verrucomicrobia - D3                    | Verruco_D3                              |
| AJ401115  | uncultured verrucomicrobium DEV008              | (20) | Verrucomicrobia - D3                    | Verruco_D3                              |
| AY028219  | uncultured Verrucomicrobia bacterium            | (20) | Verrucomicrobia - D3                    | Verruco_D3                              |
| AJ229246  | <i>Opitutus terrae</i>                          | (20) | <i>Opitutus terrae</i>                  | <i>Opitutus terrae</i>                  |
| AJ229239  | <i>Opitutus terrae</i>                          | (20) | <i>Opitutus terrae</i>                  | <i>Opitutus terrae</i>                  |
| AJ229235  | <i>Opitutus terrae</i> PB90-1                   | (20) | <i>Opitutus terrae</i>                  | <i>Opitutus terrae</i>                  |
| X99391    | <i>Opitutus</i> sp. VeCb1                       | (20) | <i>Opitutus</i> sp.                     | <i>Opitutus</i> sp.                     |
| X99390    | <i>Opitutus</i> sp. VeGlc2                      | (20) | <i>Opitutus</i> sp.                     | <i>Opitutus</i> sp.                     |
| X99392    | <i>Opitutus</i> sp. VeSm13                      | (20) | <i>Opitutus</i> sp.                     | <i>Opitutus</i> sp.                     |
| AF234133  | uncultured bacterium #0319-6L10                 | (20) | Verrucomicrobia - D4                    | Verruco_D4                              |
| AJ289985  | uncultured bacterium FukuN111                   | (20) | Verrucomicrobia - D4                    | Verruco_D4                              |
| AB073978  | <i>Fucophilus fucoidanalyticus</i>              | (20) | <i>Fucophilus fucoidanalyticus</i>      | <i>Fucophilus fucoidanalyticus</i>      |
| Y19169    | Epixenosomes of <i>Euplatidium arenarium</i>    | (20) | Verrucomicrobia - D4                    | Verruco_D4                              |
| U81738    | uncultured bacterium                            | (20) | Verrucomicrobia - D4                    | Verruco_D4                              |
| AB015546  | uncultured bacterium                            | (20) | Verrucomicrobia - D5                    | Verruco_D5                              |
| AY114334  | uncultured Verrucomicrobia bacterium            | (20) | Verrucomicrobia - D5                    | Verruco_D5                              |
| AY114330  | uncultured Verrucomicrobia bacterium            | (20) | Verrucomicrobia - D5                    | Verruco_D5                              |
| AY114328  | uncultured Verrucomicrobia bacterium            | (20) | Verrucomicrobia - D5                    | Verruco_D5                              |
| AY114329  | uncultured Verrucomicrobia bacterium            | (20) | Verrucomicrobia - D5                    | Verruco_D5                              |
| AJ241008  | uncultured Planctomyces Sva0500                 | (20) | Verrucomicrobia - D5                    | Verruco_D5                              |
| AY114333  | uncultured Verrucomicrobia bacterium            | (20) | Verrucomicrobia - D5                    | Verruco_D5                              |
| AY114336  | uncultured Verrucomicrobia bacterium            | (20) | Verrucomicrobia - D5                    | Verruco_D5                              |
| AY082462  | uncultured Verrucomicrobia bacterium            | (20) | Verrucomicrobia - D5                    | Verruco_D5                              |
| AF001775  | unidentified rumen bacterium RFP12              | (20) | Verrucomicrobia - D5                    | Verruco_D5                              |
| AF507896  | uncultured Verrucomicrobia bacterium            | (20) | Verrucomicrobia - D5                    | Verruco_D5                              |
| AJ390455  | uncultured soil bacterium PBS-III-26            | (20) | Verrucomicrobia - D5                    | Verruco_D5                              |
| AY114320  | uncultured Verrucomicrobia bacterium            | (20) | Verrucomicrobia - D5                    | Verruco_D5                              |
| AF507898  | uncultured Verrucomicrobia bacterium            | (20) | Verrucomicrobia - D5                    | Verruco_D5                              |
| AF454310  | uncultured Verrucomicrobia bacterium            | (20) | Verrucomicrobia - D5                    | Verruco_D5                              |
| AF454309  | uncultured Verrucomicrobia bacterium            | (20) | Verrucomicrobia - D5                    | Verruco_D5                              |
| AY114314  | uncultured Verrucomicrobia bacterium            | (20) | Verrucomicrobia - D5                    | Verruco_D5                              |
| AJ390453  | uncultured soil bacterium PBS-III-20            | (20) | Verrucomicrobia - D5                    | Verruco_D5                              |
| AY114323  | uncultured Verrucomicrobia bacterium            | (20) | Verrucomicrobia - D5                    | Verruco_D5                              |
| AY114322  | uncultured Verrucomicrobia bacterium            | (20) | Verrucomicrobia - D5                    | Verruco_D5                              |
| AY114317  | uncultured Verrucomicrobia bacterium            | (20) | Verrucomicrobia - D5                    | Verruco_D5                              |
| AY114312  | uncultured Verrucomicrobia bacterium            | (20) | Verrucomicrobia - D5                    | Verruco_D5                              |
| AY114335  | uncultured Verrucomicrobia bacterium            | (20) | Verrucomicrobia - D5                    | Verruco_D5                              |
| AJ401121  | uncultured verrucomicrobium DEV055              | (20) | Verrucomicrobia - D5                    | Verruco_D5                              |
| AJ401113  | uncultured verrucomicrobium DEV045              | (20) | Verrucomicrobia - D5                    | Verruco_D5                              |
| AF419674  | uncultured bacterium                            | (20) | Verrucomicrobia - D5                    | Verruco_D5                              |
| AJ252607  | agricultural soil bacterium SC-I-2              | (20) | Gemmatimonadetes - D1                   | Gemmati_D1                              |
| AF524020  | uncultured bacterium                            | (20) | Gemmatimonadetes - D1                   | Gemmati_D1                              |
| AF545649  | uncultured Gemmatimonadetes bacterium           | (20) | Gemmatimonadetes - D1                   | Gemmati_D1                              |
| AF507599  | uncultured soil bacterium                       | (20) | Gemmatimonadetes - D1                   | Gemmati_D1                              |
| AF234140  | uncultured bacterium #0319-7F1                  | (20) | Gemmatimonadetes - D1                   | Gemmati_D1                              |
| AF009987  | uncultured bacterium                            | (20) | Gemmatimonadetes - D1                   | Gemmati_D1                              |
| AF507703  | uncultured soil bacterium                       | (20) | Gemmatimonadetes - D1                   | Gemmati_D1                              |
| AF491670  | uncultured bacterium                            | (20) | Gemmatimonadetes - D1                   | Gemmati_D1                              |
| AF255632  | uncultured bacterium                            | (20) | Gemmatimonadetes - D1                   | Gemmati_D1                              |
| AF268993  | uncultured bacterium SBRH63                     | (20) | Gemmatimonadetes - D1                   | Gemmati_D1                              |

|           |                                                  |      |                       |                                          |
|-----------|--------------------------------------------------|------|-----------------------|------------------------------------------|
| AF432607  | uncultured bacterium                             | (20) | Gemmatimonadetes - D1 | Gemmati_D1                               |
| AF234125  | uncultured bacterium #0319-6A19                  | (20) | Gemmatimonadetes - D1 | Gemmati_D1                               |
| AJ519400  | uncultured actinobacterium                       | (20) | Gemmatimonadetes - D2 | Gemmati_D2                               |
| AJ519397  | uncultured actinobacterium                       | (20) | Gemmatimonadetes - D2 | Gemmati_D2                               |
| AY102345  | uncultured bacterium                             | (20) | Gemmatimonadetes - D2 | Gemmati_D2                               |
| AY102340  | uncultured bacterium                             | (20) | Gemmatimonadetes - D2 | Gemmati_D2                               |
| AJ252692  | rhizosphere soil bacterium RSC-II-71             | (20) | Gemmatimonadetes - D2 | Gemmati_D2                               |
| AJ519401  | uncultured actinobacterium                       | (20) | Gemmatimonadetes - D2 | Gemmati_D2                               |
| AJ519396  | uncultured actinobacterium                       | (20) | Gemmatimonadetes - D2 | Gemmati_D2                               |
| AF234139  | uncultured bacterium #0319-7E19                  | (20) | Gemmatimonadetes - D2 | Gemmati_D2                               |
| AF234148  | uncultured bacterium #0319-7G21                  | (20) | Gemmatimonadetes - D2 | Gemmati_D2                               |
| AJ519398  | uncultured actinobacterium                       | (20) | Gemmatimonadetes - D2 | Gemmati_D2                               |
| AJ519396  | uncultured actinobacterium                       | (20) | Gemmatimonadetes - D2 | Gemmati_D2                               |
| AB087362  | uncultured bacterium                             | (20) | Gemmatimonadetes - D2 | Gemmati_D2                               |
| AJ347028  | uncultured bacterium                             | (20) | Gemmatimonadetes - D3 | Gemmati_D3                               |
| AB015578  | uncultured bacterium                             | (20) | Gemmatimonadetes - D3 | Gemmati_D3                               |
| AF424420  | uncultured actinobacterium                       | (20) | Gemmatimonadetes - D3 | Gemmati_D3                               |
| AF424432  | uncultured actinobacterium                       | (20) | Gemmatimonadetes - D3 | Gemmati_D3                               |
| AB015540  | uncultured bacterium                             | (20) | Gemmatimonadetes - D3 | Gemmati_D3                               |
| AF328204  | uncultured bacterium                             | (20) | Gemmatimonadetes - D3 | Gemmati_D3                               |
| AF009988  | uncultured bacterium                             | (20) | Gemmatimonadetes      | Gemmatimonadetes                         |
| AY053483  | uncultured bacterium                             | (20) | Gemmatimonadetes      | Gemmatimonadetes                         |
| AF507712  | uncultured soil bacterium                        | (20) | Gemmatimonadetes      | Gemmatimonadetes                         |
| AF328213  | uncultured bacterium                             | (20) | Gemmatimonadetes      | Gemmatimonadetes                         |
| AF186416  | uncultured sponge symbiont PAUC51f               | (20) | Gemmatimonadetes - D4 | Gemmati_D4                               |
| AF186415  | uncultured sponge symbiont PAUC43f               | (20) | Gemmatimonadetes - D4 | Gemmati_D4                               |
| AF286033  | saltmarsh clone LCP-68                           | (20) | Gemmatimonadetes - D4 | Gemmati_D4                               |
| AF424428  | uncultured actinobacterium                       | (20) | Gemmatimonadetes - D4 | Gemmati_D4                               |
| AF424431  | uncultured actinobacterium                       | (20) | Gemmatimonadetes - D4 | Gemmati_D4                               |
| AF317745  | unidentified bacterium wb1_A18                   | (20) | Gemmatimonadetes - D4 | Gemmatimonadetes                         |
| NR_029309 | <i>Geovibrio ferrireducens</i>                   | /    | /                     | <i>Geovibrio ferrireducens</i>           |
| NR_028005 | <i>Geovibrio thiophilus</i>                      | /    | /                     | <i>Geovibrio thiophilus</i>              |
| NR_044488 | <i>Deferribacter autotrophicus</i>               | /    | /                     | <i>Deferribacter autotrophicus</i>       |
| NR_028995 | <i>Deferribacter abyssi</i>                      | /    | /                     | <i>Deferribacter abyssi</i>              |
| NR_028640 | <i>Deferribacter desulfuricans</i> SSM1          | /    | /                     | <i>Deferribacter desulfuricans</i>       |
| NR_027535 | <i>Dentrovibrio acetiphilus</i> DSM 12809        | /    | /                     | <i>Dentrovibrio acetiphilus</i>          |
| NR_041643 | <i>Calditerrivibrio nitroreducens</i>            | /    | /                     | <i>Calditerrivibrio nitroreducens</i>    |
| NR_042077 | <i>Alkanibacter difficilis</i>                   | /    | /                     | <i>Alkanibacter difficilis</i>           |
| NR_042968 | <i>Aquimonas voraii</i>                          | /    | /                     | <i>Aquimonas voraii</i>                  |
| NR_042972 | <i>Pseudoxanthomonas koreensis</i>               | /    | /                     | <i>Pseudoxanthomonas koreensis</i>       |
| NR_042023 | <i>Bacteriovorax stolpii</i>                     | /    | /                     | <i>Bacteriovorax stolpii</i>             |
| NR_028723 | <i>Bacteriovorax marinus</i> SJ                  | /    | /                     | <i>Bacteriovorax marinus</i>             |
| NR_028724 | <i>Bacteriovorax litoralis</i>                   | /    | /                     | <i>Bacteriovorax litoralis</i>           |
| NR_027553 | <i>Bdellovibrio bacteriovorus</i> HD100          | /    | /                     | <i>Bdellovibrio bacteriovorus</i>        |
| NR_028969 | <i>Caldithrix abyssi</i>                         | /    | /                     | <i>Caldithrix abyssi</i>                 |
| FJ990729  | <i>Caldithrix palaeochoaryensis</i>              | /    | /                     | <i>Caldithrix palaeochoaryensis</i>      |
| FJ902365  | uncultured <i>Caldithrix</i> sp.                 | /    | /                     | <i>Caldithrix</i>                        |
| NR_041385 | <i>Sulfurivirga caldicurallii</i>                | /    | /                     | <i>Sulfurivirga caldicurallii</i>        |
| AB468957  | <i>Thiopropfundum lithotrophicum</i>             | /    | /                     | <i>Thiopropfundum lithotrophicum</i>     |
| AB266389  | <i>Thiopropfundum hispidum</i>                   | /    | /                     | <i>Thiopropfundum hispidum</i>           |
| JF421220  | uncultured <i>Magnetococcus</i> sp.              | /    | /                     | <i>Magnetococcus</i>                     |
| JN188492  | uncultured <i>Magnetococcus</i> sp.              | /    | /                     | <i>Magnetococcus</i>                     |
| EF371495  | uncultured <i>Magnetococcus</i> sp.              | /    | /                     | <i>Magnetococcus</i>                     |
| HM799049  | uncultured SAR324 cluster bacterium              | /    | /                     | SAR324                                   |
| JN591923  | uncultured SAR324 cluster bacterium              | /    | /                     | SAR324                                   |
| DQ810614  | uncultured SAR324 cluster bacterium              | /    | /                     | SAR324                                   |
| HM103629  | uncultured SAR324 cluster bacterium              | /    | /                     | SAR324                                   |
| DQ413113  | uncultured bacterium                             | /    | /                     | TM6                                      |
| GU179759  | uncultured candidate division TM6 bacterium      | /    | /                     | TM6                                      |
| AM936568  | uncultured candidate division TM6 bacterium      | /    | /                     | TM6                                      |
| EU038002  | uncultured candidate division TM6 bacterium      | /    | /                     | TM6                                      |
| NR_041306 | <i>Syntrophorhabdus aromaticivorans</i> U1       | /    | /                     | <i>Syntrophorhabdus aromaticivorans</i>  |
| AJ009498  | uncultured Syntrophorhabdaceae bacterium SJA-162 | /    | /                     | Syntrophorhabdaceae                      |
| JQ580300  | uncultured candidate division BRC1 bacterium     | /    | /                     | BRC1                                     |
| FJ484668  | uncultured candidate division BRC1 bacterium     | /    | /                     | BRC1                                     |
| JQ919770  | uncultured candidate division BRC1 bacterium     | /    | /                     | BRC1                                     |
| NR_043709 | <i>Geokallibacter ferrihydriticus</i>            | /    | /                     | <i>Desulfuromonas alkaliphilus</i>       |
| EF527232  | <i>Geobacter</i> sp. M21                         | /    | /                     | <i>Geobacter</i> sp.                     |
| AY835391  | <i>Desulfuromonas svalbardensis</i>              | /    | /                     | <i>Desulfuromonas svalbardensis</i>      |
| DQ317601  | Candidatus <i>Anammoxaglobus propionicus</i>     | /    | /                     | C. <i>Anammoxaglobus propionicus</i>     |
| FN550086  | uncultured bacterium                             | /    | /                     | Unaffiliated_D2                          |
| NR_043542 | <i>Thermolithobacter carboxydivorans</i>         | /    | /                     | <i>Thermolithobacter carboxydivorans</i> |
| AF282252  | <i>Thermolithobacter ferrireducens</i>           | /    | /                     | <i>Ferribacter thermoautotrophicus</i>   |
| AJ271656  | <i>Pelobacter</i> sp. A3b3                       | /    | /                     | <i>Pelobacter</i> sp.                    |
| JN537177  | uncultured organism                              | /    | /                     | Unaffiliated_D2                          |
| JQ580102  | uncultured Gemmatimonadetes bacterium            | /    | /                     | Gemmati_D4                               |
| JQ580436  | uncultured Gemmatimonadetes bacterium            | /    | /                     | Gemmati_D4                               |
| JQ836680  | <i>Micromonospora</i> sp. 2701GPT1-10            | /    | /                     | <i>Micromonospora</i> sp.                |
| FJ481616  | <i>Micromonospora echinaurantiaca</i>            | /    | /                     | <i>Micromonospora echinaurantiaca</i>    |
| NR_041338 | <i>Luedemannella helvata</i>                     | /    | /                     | <i>Luedemannella helvata</i>             |
| FJ806642  | <i>Verrucosipora</i> sp. M1233                   | /    | /                     | <i>Verrucosipora</i> sp.                 |
| NR_041256 | <i>Micromonospora narathiwatensis</i>            | /    | /                     | <i>Micromonospora narathiwatensis</i>    |
| NR_024672 | <i>Thermaerobacter marianensis</i> DSM 12885     | /    | /                     | <i>Thermaerobacter marianensis</i>       |
| EF545603  | <i>Mastigocladus</i> sp. CR_11M                  | /    | /                     | <i>Mastigocladus</i> sp.                 |
| AY224199  | <i>Synechococcus</i> sp. MH301                   | /    | /                     | <i>Synechococcus</i> sp.                 |
| JQ712638  | <i>Microcoleus vaginatus</i> S13                 | /    | /                     | <i>Microcoleus vaginatus</i>             |
| AB115965  | <i>Crinium magnum</i> SAG 34.87                  | /    | /                     | <i>Crinium magnum</i>                    |
| AM230705  | <i>Gloeotrichia echinulata</i> URA3              | /    | /                     | <i>Gloeotrichia echinulata</i>           |
| AF489534  | <i>Caloramator uzoniensis</i>                    | /    | /                     | <i>Caloramator uzoniensis</i>            |
| JQ670735  | <i>Laceyella sacchari</i>                        | /    | /                     | <i>Laceyella sacchari</i>                |
| NR_026352 | <i>Thermobranchium celere</i>                    | /    | /                     | <i>Thermobranchium celere</i>            |
| NR_026134 | <i>Caloramator indicus</i>                       | /    | /                     | <i>Caloramator indicus</i>               |
| NR_043169 | <i>Caldalkalibacillus thermanum</i>              | /    | /                     | <i>Caldalkalibacillus thermanum</i>      |
| AB110988  | <i>Paenibacillus lentimorbus</i>                 | /    | /                     | <i>Paenibacillus lentimorbus</i>         |
| NR_028814 | <i>Thermaerobacter subterraneus</i>              | /    | /                     | <i>Thermaerobacter subterraneus</i>      |
| JN860317  | uncultured bacterium                             | /    | /                     | PCGroup_D3                               |
| JQ245587  | uncultured bacterium                             | /    | /                     | PCGroup_D3                               |
| JQ611103  | uncultured bacterium                             | /    | /                     | PCGroup_D4                               |
| FJ792199  | uncultured bacterium                             | /    | /                     | PCGroup_D4                               |
| GQ354905  | uncultured Microgenomates bacterium              | /    | /                     | PCGroup_D2                               |
| FN429863  | uncultured Tenericutes bacterium                 | /    | /                     | PCGroup_D2                               |
| FN429855  | uncultured Firmicutes bacterium                  | /    | /                     | PCGroup_D2                               |
| EU245855  | uncultured organism                              | /    | /                     | Unaffiliated_D1                          |
| JN533061  | uncultured organism                              | /    | /                     | Unaffiliated_D1                          |
| FM242438  | uncultured bacterium                             | /    | /                     | Unaffiliated_D1                          |
| FJ712494  | uncultured bacterium                             | /    | /                     | Unaffiliated_D1                          |
| FN820319  | uncultured bacterium                             | /    | /                     | Unaffiliated_D1                          |
| DQ521794  | uncultured bacterium                             | /    | /                     | Unaffiliated_D3                          |
| JN230082  | uncultured bacterium                             | /    | /                     | Unaffiliated_D3                          |
| HE972157  | uncultured delta proteobacterium                 | (12) | SEEP-SRB1a            | SEEP-SRB1a                               |
| HE972158  | uncultured delta proteobacterium                 | (12) | SEEP-SRB1a            | SEEP-SRB1a                               |
| HE972159  | uncultured delta proteobacterium                 | (12) | SEEP-SRB1a            | SEEP-SRB1a                               |
| HE972160  | uncultured delta proteobacterium                 | (12) | SEEP-SRB1a            | SEEP-SRB1a                               |
| HE972161  | uncultured delta proteobacterium                 | (12) | SEEP-SRB1a            | SEEP-SRB1a                               |
| HE972162  | uncultured delta proteobacterium                 | (12) | SEEP-SRB1a            | SEEP-SRB1a                               |
| HE972163  | uncultured delta proteobacterium                 | (12) | SEEP-SRB1a            | SEEP-SRB1a                               |
| HE972164  | uncultured delta proteobacterium                 | (12) | SEEP-SRB1a            | SEEP-SRB1a                               |

|          |                                        |      |                      |                      |
|----------|----------------------------------------|------|----------------------|----------------------|
| HE972165 | uncultured delta proteobacterium       | (12) | SEEP-SRB1a           | SEEP-SRB1a           |
| HE972166 | uncultured delta proteobacterium       | (12) | SEEP-SRB1            | SEEP-SRB1a           |
| HE972167 | uncultured delta proteobacterium       | (12) | SEEP-SRB1e           | SEEP-SRB1e           |
| HE972168 | uncultured delta proteobacterium       | (12) | SEEP-SRB1e           | Desulfobacteraceae   |
| HE972169 | uncultured delta proteobacterium       | (12) | SEEP-SRB1b           | SEEP-SRB1b           |
| HE972170 | uncultured delta proteobacterium       | (12) | Desulfobacteraceae   | SEEP-SRB1c           |
| HE972171 | uncultured delta proteobacterium       | (12) | Desulfobacteraceae   | Desulfobacteraceae_3 |
| HE972172 | uncultured delta proteobacterium       | (12) | Desulfobacteraceae   | Desulfobacteraceae_3 |
| HE972173 | uncultured delta proteobacterium       | (12) | Desulfobacteraceae   | Desulfobacteraceae_3 |
| HE972174 | uncultured delta proteobacterium       | (12) | Desulfobacteraceae   | Desulfobacteraceae   |
| HE972175 | uncultured delta proteobacterium       | (12) | Desulfobacteraceae   | Desulfobacteraceae   |
| HE972176 | uncultured delta proteobacterium       | (12) | Desulfobacteraceae   | Desulfobacteraceae   |
| HE972177 | uncultured delta proteobacterium       | (12) | Desulfobacteraceae   | Desulfobacteraceae   |
| HE972178 | uncultured delta proteobacterium       | (12) | Desulfobacteraceae   | Desulfobacteraceae   |
| HE972179 | uncultured delta proteobacterium       | (12) | Desulfobacteraceae   | Desulfobacteraceae   |
| HE972180 | uncultured delta proteobacterium       | (12) | Desulfobacteraceae   | Desulfobacteraceae   |
| HE972181 | uncultured delta proteobacterium       | (12) | Desulfobacteraceae   | Desulfobacterales_2  |
| HE972182 | uncultured delta proteobacterium       | (12) | Desulfobacteraceae   | Desulfobacterales_2  |
| HE972183 | uncultured delta proteobacterium       | (12) | Desulfobacteraceae   | Desulfobacterales_2  |
| HE972184 | uncultured delta proteobacterium       | (12) | Desulfobacteraceae   | Desulfobacterales_1  |
| HE972185 | uncultured delta proteobacterium       | (12) | Desulfobulbaceae     | Desulfobulbaceae     |
| HE972186 | uncultured delta proteobacterium       | (12) | Desulfobulbaceae     | Desulfobulbaceae     |
| HE972187 | uncultured delta proteobacterium       | (12) | Desulfobulbaceae     | Desulfobulbaceae     |
| HE972188 | uncultured delta proteobacterium       | (12) | Desulfobulbaceae     | Desulfobulbaceae     |
| HE972189 | uncultured delta proteobacterium       | (12) | Desulfobulbaceae     | Verruco_D5           |
| HE972190 | uncultured delta proteobacterium       | (12) | SEEP-SRB3            | Desulfobulbaceae     |
| HE972191 | uncultured delta proteobacterium       | (12) | SEEP-SRB3            | SEEP-SRB3            |
| HE972192 | uncultured delta proteobacterium       | (12) | SEEP-SRB3            | SEEP-SRB3            |
| HE972193 | uncultured delta proteobacterium       | (12) | SEEP-SRB3            | SEEP-SRB3            |
| HE972194 | uncultured delta proteobacterium       | (12) | SEEP-SRB3            | Desulfobulbaceae     |
| HE972195 | uncultured delta proteobacterium       | (12) | SEEP-SRB3            | SEEP-SRB3            |
| HE972197 | uncultured delta proteobacterium       | (12) | SEEP-SRB4            | SEEP-SRB4            |
| HE972198 | uncultured delta proteobacterium       | (12) | SEEP-SRB4            | SEEP-SRB4            |
| HE972199 | uncultured delta proteobacterium       | (12) | Desulfobulbaceae     | Desulfobulbaceae_1   |
| HE972200 | uncultured delta proteobacterium       | (12) | Desulfobulbaceae     | Desulfobulbaceae_1   |
| HE972201 | uncultured delta proteobacterium       | (12) | Desulfobulbaceae     | Desulfobulbaceae_1   |
| HE972202 | uncultured delta proteobacterium       | (12) | SEEP-SRB2            | SEEP-SRB2            |
| HE972203 | uncultured delta proteobacterium       | (12) | SEEP-SRB2            | SEEP-SRB2            |
| HE972204 | uncultured delta proteobacterium       | (12) | Deltaproteobacteria  | Desulfuromonadales   |
| HE972205 | uncultured delta proteobacterium       | (12) | Deltaproteobacteria  | Myxococcales         |
| HE972206 | uncultured delta proteobacterium       | (12) | Deltaproteobacteria  | Myxococcales         |
| HE972207 | uncultured delta proteobacterium       | (12) | Deltaproteobacteria  | Unaffiliated_D4      |
| HE972208 | uncultured delta proteobacterium       | (12) | Deltaproteobacteria  | Unaffiliated_D4      |
| AJ578142 | uncultured archaeon                    | (21) | MBG-B                | MBG-B                |
| AJ578143 | uncultured archaeon                    | (21) | MBG-B                | MBG-B                |
| AV093453 | uncultured archaeon                    | (21) | SAGMEG-I             | SAGMEG               |
| AV704374 | uncultured archaeon                    | (21) | MCG                  | MCG                  |
| DQ302001 | uncultured archaeon                    | (21) | MBG-B                | MBG-B                |
| DQ302002 | uncultured archaeon                    | (21) | MBG-B                | MBG-B                |
| DQ302003 | uncultured archaeon                    | (21) | MBG-B                | MBG-B                |
| DQ302004 | uncultured archaeon                    | (21) | SAGMEG-I             | SAGMEG               |
| DQ302005 | uncultured archaeon                    | (21) | MBG-B                | MBG-B                |
| DQ302006 | uncultured archaeon                    | (21) | SAGMEG-I             | SAGMEG               |
| DQ302007 | uncultured archaeon                    | (21) | MBG-B                | MBG-B                |
| DQ302009 | uncultured archaeon                    | (21) | MCG                  | MCG                  |
| DQ302012 | uncultured archaeon                    | (21) | MCG                  | MCG                  |
| DQ302013 | uncultured archaeon                    | (21) | MCG                  | MCG                  |
| DQ302014 | uncultured archaeon                    | (21) | MCG                  | MCG                  |
| DQ302017 | uncultured archaeon                    | (21) | MCG                  | MCG                  |
| DQ302018 | uncultured archaeon                    | (21) | MCG                  | MCG-13               |
| DQ302021 | uncultured archaeon                    | (21) | MCG                  | MCG                  |
| DQ302022 | uncultured archaeon                    | (21) | MG-II                | MBG-D                |
| DQ302024 | uncultured archaeon                    | (21) | MCG                  | MCG                  |
| DQ302025 | uncultured archaeon                    | (21) | MBG-B                | MBG-B                |
| DQ302029 | uncultured archaeon                    | (21) | MCG                  | MCG                  |
| DQ302030 | uncultured archaeon                    | (21) | MBG-B                | MBG-B                |
| AF119137 | uncultured archaeon APA3-11cm          | (21) | MBG-B                | MBG-B                |
| AF119128 | uncultured archaeon CRA8-27cm          | (21) | MBG-B                | MBG-B                |
| AY436514 | uncultured crenarchaeote               | (21) | MBG-B                | MBG-B                |
| AB196288 | <i>Methanocella paludicola</i> SANAE   | (22) | Methanocellales      | Methanocellales      |
| AY817738 | <i>Methanoseta harundinacea</i> 8Ac    | (22) | Methanoseta          | Methanoseta          |
| DQ787474 | <i>Methermicrococcus shengliensis</i>  | (22) | Methermicrococcus    | Methermicrococcus    |
| AF354131 | uncultured archaeon                    | (22) | ANME-2c              | ANME-2c              |
| AF354133 | uncultured archaeon                    | (22) | ANME-2c              | ANME-2c              |
| AF354134 | uncultured archaeon                    | (22) | ANME-2ab             | ANME-2ab             |
| AF356640 | uncultured archaeon                    | (22) | ANME-1a Guaymas II   | ANME-1               |
| AF356644 | uncultured archaeon                    | (22) | ANME-1a Guaymas II   | ANME-1               |
| AF419625 | uncultured archaeon                    | (22) | ANME-1a Guaymas I    | ANME-1               |
| AF419626 | uncultured archaeon                    | (22) | ANME-1a Guaymas II   | ANME-1               |
| AF419630 | uncultured archaeon                    | (22) | ANME-1 Guaymas       | ANME-1 Guaymas       |
| AF419631 | uncultured archaeon                    | (22) | ANME-1 Guaymas       | ANME-1 Guaymas       |
| AF419632 | uncultured archaeon                    | (22) | ANME-1 Guaymas       | ANME-1 Guaymas       |
| AF419638 | uncultured archaeon                    | (22) | ANME-2c              | ANME-2c              |
| AF419645 | uncultured archaeon                    | (22) | Methanomicrobiales   | Methanomicrobiales   |
| AJ578115 | uncultured archaeon                    | (22) | ANME-2c              | ANME-2c              |
| AJ578116 | uncultured archaeon                    | (22) | ANME-2ab             | ANME-2ab             |
| AJ578120 | uncultured archaeon                    | (22) | ANME-1b              | ANME-1               |
| AJ578123 | uncultured archaeon                    | (22) | ANME-1b              | ANME-1               |
| AJ578125 | uncultured archaeon                    | (22) | Methanomicrobiales   | Methanocellales      |
| AJ579316 | uncultured archaeon                    | (22) | ANME-1b              | ANME-1               |
| AY053468 | uncultured archaeon                    | (22) | ANME-1a              | ANME-1               |
| AY760632 | uncultured archaeon                    | (22) | ANME-1a              | ANME-1               |
| AY835419 | uncultured archaeon                    | (22) | Methanosarcinales    | Methanosarcinales    |
| AY835420 | uncultured archaeon                    | (22) | Methanosarcinales    | Methanosarcinales    |
| DQ270605 | uncultured archaeon                    | (22) | ANME-1a              | ANME-1               |
| DQ522907 | uncultured archaeon                    | (22) | ANME-2ab             | ANME-2ab             |
| EF680216 | uncultured archaeon                    | (22) | Methanomicrobiales   | Methanocellales      |
| FJ404024 | uncultured archaeon                    | (22) | ANME-2c              | ANME-2c              |
| FR682489 | uncultured archaeon                    | (22) | ANME-1a Guaymas I    | ANME-1               |
| FR682490 | uncultured archaeon                    | (22) | ANME-1a Guaymas II   | ANME-1               |
| FR682491 | uncultured archaeon                    | (22) | ANME-1a Guaymas II   | ANME-1               |
| JF937715 | uncultured crenarchaeote               | (22) | ANME-1 Guaymas       | ANME-1 Guaymas       |
| JF937719 | uncultured euryarchaeote               | (22) | ANME-1 Guaymas       | ANME-1 Guaymas       |
| JF937729 | uncultured euryarchaeote               | (22) | Methanosarcinaceae   | Methanosarcinaceae   |
| JF937730 | uncultured euryarchaeote               | (22) | Methanomicrobiales   | Methanocellales      |
| JF937743 | uncultured euryarchaeote               | (22) | ANME-2ab             | ANME-2ab             |
| JF937746 | uncultured euryarchaeote               | (22) | ANME-1 Guaymas       | ANME-1 Guaymas       |
| JF937751 | uncultured euryarchaeote               | (22) | ANME-1a Guaymas II   | ANME-1               |
| JF937764 | uncultured euryarchaeote               | (22) | ANME-2c              | ANME-2c              |
| JF937766 | uncultured euryarchaeote               | (22) | Methanosarcinaceae   | Methanosarcinaceae   |
| JF937767 | uncultured euryarchaeote               | (22) | Methanomicrobiales   | Methanocellales      |
| JF937770 | uncultured euryarchaeote               | (22) | ANME-1a Guaymas II   | ANME-1               |
| JF937791 | uncultured euryarchaeote               | (22) | ANME-1 Guaymas       | ANME-1 Guaymas       |
| X05567   | <i>Archaeoglobus fulgidus</i>          | (1)  | Archaeoglobales      | Archaeoglobus        |
| AY941802 | <i>Methanococcoides alaskense</i>      | (1)  | Methanococcoides     | Methanococcoides     |
| Y16946   | <i>Methanococcoides</i> sp. NaT1       | (1)  | Methanococcoides     | Methanococcoides     |
| AY260433 | <i>Methanomethylivorans hollandica</i> | (1)  | Methanomethylivorans | Methanomethylivorans |



|          |                                        |      |                                        |                    |
|----------|----------------------------------------|------|----------------------------------------|--------------------|
| AJ578097 | uncultured archaeon                    | (1)  | ANME-2a                                | ANME-2ab           |
| AJ578103 | uncultured archaeon                    | (1)  | ANME-2ab                               | ANME-2             |
| AJ578118 | uncultured archaeon                    | (1)  | ANME-2c                                | ANME-2c            |
| AJ578135 | uncultured archaeon                    | (1)  | ANME-1b                                | ANME-1             |
| AJ704631 | uncultured archaeon                    | (1)  | ANME-3                                 | ANME-3             |
| AJ890141 | uncultured archaeon                    | (1)  | ANME-2c                                | ANME-2c            |
| AY345181 | uncultured archaeon                    | (1)  | ANME-2c                                | ANME-2c            |
| AY592029 | uncultured archaeon                    | (1)  | ANME-2ab                               | ANME-2             |
| AY592033 | uncultured archaeon                    | (1)  | ANME-3                                 | ANME-3             |
| AY592036 | uncultured archaeon                    | (1)  | ANME-2ab                               | ANME-2             |
| AY592050 | uncultured archaeon                    | (1)  | ANME-2a                                | ANME-2ab           |
| AF134393 | uncultured archaeon BA2H11fin          | (1)  | ANME-2a                                | ANME-2ab           |
| AB240742 | uncultured archaeon                    | (23) | MG-I                                   | MG-I               |
| AB525485 | uncultured archaeon                    | (23) | MBG-D                                  | MBG-D              |
| AJ578107 | uncultured archaeon                    | (23) | ANME-2a                                | ANME-2ab           |
| EU048598 | uncultured archaeon                    | (23) | MBG-A                                  | MBG-A              |
| EU084518 | uncultured archaeon                    | (23) | MBG-D                                  | Thermoplasmatales  |
| EU385860 | uncultured archaeon                    | (23) | NHG                                    | VALIII-b           |
| EU622307 | uncultured archaeon                    | (23) | ANME-2c                                | ANME-2c            |
| FJ264517 | uncultured archaeon                    | (23) | MBG-D                                  | MBG-D              |
| FJ264730 | uncultured archaeon                    | (23) | MG-I                                   | MG-I               |
| FJ264742 | uncultured archaeon                    | (23) | MBG-D                                  | MBG-D              |
| FJ264796 | uncultured archaeon                    | (23) | MBG-B / DSAG                           | MBG-B              |
| FJ264797 | uncultured archaeon                    | (23) | MBG-B / DSAG                           | MBG-B              |
| FJ264805 | uncultured archaeon                    | (23) | MBG-C                                  | MCG                |
| FJ264822 | uncultured archaeon                    | (23) | C3                                     | MCG-15             |
| FJ264830 | uncultured archaeon                    | (23) | MBG-B / DSAG                           | MBG-B              |
| FJ264835 | uncultured archaeon                    | (23) | MBG-D                                  | MBG-D              |
| FJ455916 | uncultured archaeon                    | (23) | MBG-D                                  | Thermoplasmatales  |
| FJ455919 | uncultured archaeon                    | (23) | MBG-C                                  | MCG-6              |
| FJ455952 | uncultured archaeon                    | (23) | VALIII                                 | VALIII-a           |
| FJ571664 | uncultured archaeon                    | (23) | MG-I                                   | MG-I               |
| FJ571718 | uncultured archaeon                    | (23) | MG-I                                   | MG-I               |
| FJ571765 | uncultured archaeon                    | (23) | MG-I                                   | MG-I               |
| FJ571920 | uncultured archaeon                    | (23) | MG-I                                   | MG-I               |
| FJ649516 | uncultured archaeon                    | (23) | SAGMEG                                 | SAGMEG             |
| FJ873208 | uncultured archaeon                    | (23) | MBG-D                                  | MBG-D              |
| GQ267183 | uncultured archaeon                    | (23) | MBG-B / DSAG                           | MBG-B              |
| GQ356803 | uncultured archaeon                    | (23) | MBG-D                                  | Thermoplasmatales  |
| GQ356804 | uncultured archaeon                    | (23) | C3                                     | MCG-15             |
| GQ356819 | uncultured archaeon                    | (23) | MBG-D                                  | MBG-D              |
| GQ356873 | uncultured archaeon                    | (23) | MCG                                    | MCG-17             |
| GQ356885 | uncultured archaeon                    | (23) | MBG-D                                  | MBG-D              |
| GQ356893 | uncultured archaeon                    | (23) | MBG-D                                  | MBG-D              |
| GQ356905 | uncultured archaeon                    | (23) | MBG-C                                  | MCG-6              |
| GQ356920 | uncultured archaeon                    | (23) | MCG                                    | MCG-17             |
| GQ410883 | uncultured archaeon                    | (23) | MG-I                                   | MG-I               |
| GQ410909 | uncultured archaeon                    | (23) | MBG-D                                  | MBG-D              |
| GQ848371 | uncultured archaeon                    | (23) | MG-I                                   | MG-I               |
| GQ927533 | uncultured archaeon                    | (23) | MBG-D                                  | MBG-D              |
| GQ927658 | uncultured archaeon                    | (23) | UEG                                    | Peru Basin Group   |
| GQ994248 | uncultured archaeon                    | (23) | MBG-C                                  | MCG-6              |
| GQ994291 | uncultured archaeon                    | (23) | MHVg                                   | MHVg               |
| GQ994309 | uncultured archaeon                    | (23) | MBG-D                                  | MBG-D              |
| GQ994314 | uncultured archaeon                    | (23) | MBG-D                                  | MBG-D              |
| GQ994356 | uncultured archaeon                    | (23) | MBG-D                                  | MBG-D              |
| AJ294862 | uncultured archaeon 19b-26             | (23) | MBG-D                                  | MBG-D              |
| AM745251 | uncultured crenarchaeote               | (23) | MBG-B / DSAG                           | MBG-B              |
| EU332085 | uncultured crenarchaeote               | (23) | MBG-C                                  | MCG                |
| EU332090 | uncultured crenarchaeote               | (23) | C3                                     | MCG-15             |
| EU332092 | uncultured crenarchaeote               | (23) | MBG-C                                  | MCG                |
| AM745172 | uncultured euryarchaeote               | (23) | MBG-D                                  | MBG-D              |
| EU570152 | uncultured Thermoplasmatales archaeon  | (23) | MBG-D                                  | Thermoplasmatales  |
| M36474   | <i>Desulfurococcus mobilis</i>         | (24) | Desulfurococcales                      | Desulfurococcus    |
| AJ224936 | <i>Ferroplasma acidiphilum</i>         | (24) | Thermoplasmatales and related lineages | Ferroplasma        |
| AF033672 | <i>Methanocaldococcus halotolerans</i> | (24) | Methanomicrobiales                     | Methanomicrobiales |
| M59126   | <i>Methanocaldococcus jannaschii</i>   | (24) | Methanococcales                        | Methanococcus      |
| AY196676 | <i>Methanocorpusculum bavaricum</i>    | (24) | Methanomicrobiales                     | Methanocorpusculum |
| AF095267 | <i>Methanocorpusculum labreanum</i>    | (24) | Methanomicrobiales                     | Methanocorpusculum |
| Y16429   | <i>Methanofollis liminatans</i>        | (24) | Methanomicrobiales                     | Methanofollis      |
| U20155   | <i>Methanolobus vulcani</i>            | (24) | Methanolobus                           | Methanolobus       |
| L19921   | <i>Pyrococcus abyssi</i>               | (24) | Pyrococcus                             | Pyrococcus         |
| X99559   | <i>Pyrodictium abyssi</i> DSM 6158     | (24) | Desulfurococcales                      | Pyrodictium        |
| X99555   | <i>Pyrolobus fumarii</i> 1A            | (24) | Desulfurococcales                      | Pyrolobus          |
| D85507   | <i>Sulfurisphaera ohwakuensis</i>      | (24) | Sulfurisphaera                         | Sulfurisphaera     |
| AB005296 | <i>Thermocladium modestus</i>          | (24) | Thermocladium                          | Thermocladium      |
| AF395423 | uncultured archaeon                    | (24) | Methanosarcinales                      | Methanosarcinales  |
| AF419629 | uncultured archaeon                    | (24) | GEG                                    | GEG                |
| AF419636 | uncultured archaeon                    | (24) | MG-I                                   | MG-I               |
| AF424769 | uncultured archaeon                    | (24) | GEG                                    | GEG                |
| AF424770 | uncultured archaeon                    | (24) | Thermoplasmatales and related lineages | Thermoplasmatales  |
| AJ576221 | uncultured archaeon                    | (24) | Methanosarcinales                      | Methanosarcinales  |
| AY835407 | uncultured archaeon                    | (24) | MBG-B                                  | MBG-B              |
| AY835409 | uncultured archaeon                    | (24) | MBG-B                                  | MBG-B              |
| AY835410 | uncultured archaeon                    | (24) | MBG-B                                  | MBG-B              |
| AY835412 | uncultured archaeon                    | (24) | Methanomicrobiales                     | Methanomicrobiales |
| AY835413 | uncultured archaeon                    | (24) | Methanomicrobiales                     | Methanomicrobiales |
| AY835415 | uncultured archaeon                    | (24) | Methanomicrobiales                     | Methanomicrobiales |
| AY835416 | uncultured archaeon                    | (24) | Methanomicrobiales                     | Methanomicrobiales |
| AY835418 | uncultured archaeon                    | (24) | Methanosarcinales                      | Methanosarcinales  |
| AY835424 | uncultured archaeon                    | (24) | Thermoplasmatales and related lineages | Thermoplasmatales  |
| AY835425 | uncultured archaeon                    | (24) | GEG                                    | GEG                |
| AY835427 | uncultured archaeon                    | (24) | GEG                                    | GEG                |
| AY835428 | uncultured archaeon                    | (24) | SAGMEG                                 | SAGMEG             |
| AJ294899 | uncultured archaeon 19b-31             | (24) | ANME-2c                                | ANME-2c            |
| AF015970 | uncultured archaeon 2C174              | (24) | Methanomicrobiales                     | Methanomicrobiales |
| AF015977 | uncultured archaeon 2C83               | (24) | ANME-2ab                               | ANME-2ab           |
| AF015986 | uncultured archaeon 2MT198             | (24) | Methanosarcinales                      | Methanosarcinales  |
| AF220336 | uncultured archaeon O23D1              | (24) | Methanomicrobiales                     | Methanomicrobiales |
| AF220306 | uncultured archaeon O23F7              | (24) | Methanosarcinales                      | Methanosarcinales  |
| AB050211 | uncultured archaeon SAGMA-G            | (24) | SAGMEG                                 | SAGMEG             |
| AF068820 | uncultured archaeon VC2.1 Arc13        | (24) | Thermoplasmatales and related lineages | Thermoplasmatales  |
| AF050618 | uncultured archaeon WCHD3-16           | (24) | Thermoplasmatales and related lineages | Thermoplasmatales  |
| AF050619 | uncultured archaeon WCHD3-33           | (24) | Thermoplasmatales and related lineages | Thermoplasmatales  |
| AB019741 | unidentified archaeon                  | (24) | Thermoplasmatales and related lineages | Thermoplasmatales  |
| U81773   | unidentified archaeon                  | (24) | Thermoplasmatales and related lineages | Thermoplasmatales  |
| AB109883 | uncultured archaeon                    | (25) | MCG-14                                 | MCG                |
| AB161334 | uncultured archaeon                    | (25) | MCG-11                                 | MCG                |
| AB329790 | uncultured archaeon                    | (25) | MCG-8                                  | MCG                |
| AB329809 | uncultured archaeon                    | (25) | MCG-12                                 | MCG                |
| AJ867793 | uncultured archaeon                    | (25) | MCG-4                                  | MCG                |
| AJ867805 | uncultured archaeon                    | (25) | MCG-4                                  | MCG                |
| AJ867806 | uncultured archaeon                    | (25) | MCG-1                                  | MCG                |
| AY093449 | uncultured archaeon                    | (25) | MCG-8                                  | MCG                |
| AY354113 | uncultured archaeon                    | (25) | MCG-17                                 | MCG-17             |
| AY354121 | uncultured archaeon                    | (25) | MCG-16                                 | MCG                |
| AY592480 | uncultured archaeon                    | (25) | MCG-1                                  | MCG                |

|          |                     |      |        |        |
|----------|---------------------|------|--------|--------|
| AY704372 | uncultured archaeon | (25) | MCG-8  | MCG    |
| DQ301965 | uncultured archaeon | (25) | MCG-2  | MCG    |
| DQ301981 | uncultured archaeon | (25) | MCG-1  | MCG    |
| DQ301990 | uncultured archaeon | (25) | MCG-1  | MCG    |
| DQ301992 | uncultured archaeon | (25) | MCG-2  | MCG    |
| DQ302026 | uncultured archaeon | (25) | MCG    | MCG    |
| DQ363761 | uncultured archaeon | (25) | MCG-15 | MCG-15 |
| DQ363785 | uncultured archaeon | (25) | MCG-10 | MCG    |
| DQ522920 | uncultured archaeon | (25) | MCG-8  | MCG    |
| EF125467 | uncultured archaeon | (25) | MCG    | MCG    |
| EF125488 | uncultured archaeon | (25) | MCG-17 | MCG-17 |
| EF203529 | uncultured archaeon | (25) | MCG-12 | MCG    |
| EF203595 | uncultured archaeon | (25) | MCG    | MCG    |
| EF203628 | uncultured archaeon | (25) | MCG-8  | MCG    |
| EF203637 | uncultured archaeon | (25) | MCG    | MCG    |
| EF203656 | uncultured archaeon | (25) | MCG    | MCG    |
| EF203662 | uncultured archaeon | (25) | MCG    | MCG    |
| EF367475 | uncultured archaeon | (25) | MCG-13 | MCG-13 |
| EF367518 | uncultured archaeon | (25) | MCG-6  | MCG-6  |
| EF367618 | uncultured archaeon | (25) | MCG-6  | MCG-6  |
| EF680200 | uncultured archaeon | (25) | MCG-6  | MCG-6  |
| EF680203 | uncultured archaeon | (25) | MCG-13 | MCG-13 |
| EF680229 | uncultured archaeon | (25) | MCG-17 | MCG-17 |
| EF680231 | uncultured archaeon | (25) | MCG-17 | MCG-17 |
| EU915231 | uncultured archaeon | (25) | MCG-3  | MCG    |
| FJ264834 | uncultured archaeon | (25) | MCG-17 | MCG-17 |
| FJ404050 | uncultured archaeon | (25) | MCG-17 | MCG-17 |
| FJ455956 | uncultured archaeon | (25) | MCG-17 | MCG-17 |
| FJ560326 | uncultured archaeon | (25) | MCG    | MCG    |
| FJ853477 | uncultured archaeon | (25) | MCG    | MCG    |
| FJ853478 | uncultured archaeon | (25) | MCG    | MCG    |
| GQ328129 | uncultured archaeon | (25) | MCG-7  | MCG    |
| GQ410827 | uncultured archaeon | (25) | MCG-8  | MCG    |
| GQ926458 | uncultured archaeon | (25) | MCG-8  | MCG    |
| GQ994133 | uncultured archaeon | (25) | MCG-10 | MCG    |
| GQ994135 | uncultured archaeon | (25) | MCG-3  | MCG    |
| HM244057 | uncultured archaeon | (25) | MCG    | MCG    |
| HM244110 | uncultured archaeon | (25) | MCG-5  | MCG    |
| JN605006 | uncultured archaeon | (25) | MCG-10 | MCG    |
| JN605009 | uncultured archaeon | (25) | MCG-1  | MCG    |
| JN605013 | uncultured archaeon | (25) | MCG-10 | MCG    |
| JN605014 | uncultured archaeon | (25) | MCG-12 | MCG    |
| JN605016 | uncultured archaeon | (25) | MCG-9  | MCG    |
| JN605018 | uncultured archaeon | (25) | MCG    | MCG    |
| JN605020 | uncultured archaeon | (25) | MCG    | MCG    |
| JN605024 | uncultured archaeon | (25) | MCG-1  | MCG    |
| JN605025 | uncultured archaeon | (25) | MCG-10 | MCG    |
| JN605028 | uncultured archaeon | (25) | MCG-6  | MCG-6  |
| JN605030 | uncultured archaeon | (25) | MCG-1  | MCG    |
| JN605034 | uncultured archaeon | (25) | MCG-3  | MCG    |
| JN605036 | uncultured archaeon | (25) | MCG-10 | MCG    |
| JN605038 | uncultured archaeon | (25) | MCG-17 | MCG-17 |
| JN605040 | uncultured archaeon | (25) | MCG-6  | MCG-6  |
| JN605041 | uncultured archaeon | (25) | MCG-8  | MCG    |
| JN605042 | uncultured archaeon | (25) | MCG-4  | MCG    |
| JN605043 | uncultured archaeon | (25) | MCG    | MCG    |
| JN605044 | uncultured archaeon | (25) | MCG-6  | MCG-6  |
| JN605045 | uncultured archaeon | (25) | MCG-6  | MCG-6  |
| JN605046 | uncultured archaeon | (25) | MCG-1  | MCG    |
| JN605047 | uncultured archaeon | (25) | MCG-1  | MCG    |
| JN605048 | uncultured archaeon | (25) | MCG-9  | MCG    |
| JN605053 | uncultured archaeon | (25) | MCG-11 | MCG    |
| JN605054 | uncultured archaeon | (25) | MCG-8  | MCG    |
| JN605055 | uncultured archaeon | (25) | MCG-17 | MCG-17 |
| JN605058 | uncultured archaeon | (25) | MCG-17 | MCG-17 |
| JN605060 | uncultured archaeon | (25) | MCG-6  | MCG-6  |
| JN605061 | uncultured archaeon | (25) | MCG    | MCG    |
| JN605067 | uncultured archaeon | (25) | MCG-17 | MCG-17 |
| JN605068 | uncultured archaeon | (25) | MCG-4  | MCG    |
| JN605070 | uncultured archaeon | (25) | MCG-3  | MCG    |
| JN605071 | uncultured archaeon | (25) | MCG-11 | MCG    |
| JN605077 | uncultured archaeon | (25) | MCG    | MCG    |
| JN605078 | uncultured archaeon | (25) | MCG-11 | MCG    |
| JN605079 | uncultured archaeon | (25) | MCG    | MCG    |
| JN605080 | uncultured archaeon | (25) | MCG-17 | MCG-17 |
| JN605081 | uncultured archaeon | (25) | MCG-3  | MCG    |
| JN605084 | uncultured archaeon | (25) | MCG-13 | MCG-13 |
| JN605085 | uncultured archaeon | (25) | MCG-17 | MCG-17 |
| JN605086 | uncultured archaeon | (25) | MCG-1  | MCG    |
| JN605087 | uncultured archaeon | (25) | MCG-4  | MCG    |
| JN605088 | uncultured archaeon | (25) | MCG    | MCG    |
| JN605091 | uncultured archaeon | (25) | MCG    | MCG    |
| JN605092 | uncultured archaeon | (25) | MCG-13 | MCG-13 |
| JN605094 | uncultured archaeon | (25) | MCG-3  | MCG    |
| JN605097 | uncultured archaeon | (25) | MCG-9  | MCG    |
| JN605101 | uncultured archaeon | (25) | MCG    | MCG    |
| JN605102 | uncultured archaeon | (25) | MCG-13 | MCG-13 |
| JN605103 | uncultured archaeon | (25) | MCG-17 | MCG-17 |
| JN605106 | uncultured archaeon | (25) | MCG-8  | MCG    |
| JN605107 | uncultured archaeon | (25) | MCG-8  | MCG    |
| JN605111 | uncultured archaeon | (25) | MCG-14 | MCG    |
| JN605115 | uncultured archaeon | (25) | MCG-10 | MCG    |
| JN605117 | uncultured archaeon | (25) | MCG-11 | MCG    |
| JN605121 | uncultured archaeon | (25) | MCG    | MCG    |
| JN605122 | uncultured archaeon | (25) | MCG-12 | MCG    |
| JN605123 | uncultured archaeon | (25) | MCG-13 | MCG-13 |
| JN605126 | uncultured archaeon | (25) | MCG-3  | MCG    |
| JN605128 | uncultured archaeon | (25) | MCG-13 | MCG-13 |
| JN605129 | uncultured archaeon | (25) | MCG-13 | MCG-13 |
| JN605130 | uncultured archaeon | (25) | MCG-6  | MCG-6  |
| JN605133 | uncultured archaeon | (25) | MCG    | MCG    |
| JN605134 | uncultured archaeon | (25) | MCG    | MCG    |
| JN605136 | uncultured archaeon | (25) | MCG-8  | MCG    |
| JN605139 | uncultured archaeon | (25) | MCG-15 | MCG-15 |
| JN605140 | uncultured archaeon | (25) | MCG-4  | MCG    |
| JN605141 | uncultured archaeon | (25) | MCG-3  | MCG    |
| JN605145 | uncultured archaeon | (25) | MCG-9  | MCG    |
| JN605148 | uncultured archaeon | (25) | MCG-13 | MCG-13 |
| JN605152 | uncultured archaeon | (25) | MCG-1  | MCG    |
| JN605155 | uncultured archaeon | (25) | MCG-4  | MCG    |
| JN605156 | uncultured archaeon | (25) | MCG    | MCG    |
| JN605157 | uncultured archaeon | (25) | MCG-4  | MCG    |
| JN605158 | uncultured archaeon | (25) | MCG    | MCG    |
| JN605159 | uncultured archaeon | (25) | MCG-4  | MCG    |
| JN605160 | uncultured archaeon | (25) | MCG-1  | MCG    |
| JN605163 | uncultured archaeon | (25) | MCG    | MCG    |
| JN605166 | uncultured archaeon | (25) | MCG-1  | MCG    |

|          |                                                  |      |                              |                      |
|----------|--------------------------------------------------|------|------------------------------|----------------------|
| JN605168 | uncultured archaeon                              | (25) | MCG-8                        | MCG                  |
| JN605170 | uncultured archaeon                              | (25) | MCG-10                       | MCG                  |
| JN605171 | uncultured archaeon                              | (25) | MCG                          | MCG                  |
| JN605172 | uncultured archaeon                              | (25) | MCG                          | MCG                  |
| JN605174 | uncultured archaeon                              | (25) | MCG                          | MCG                  |
| AB301868 | uncultured crenarchaeote                         | (25) | MCG-7                        | MCG                  |
| AJ937877 | uncultured crenarchaeote                         | (25) | MCG-6                        | MCG-6                |
| AM039529 | uncultured crenarchaeote                         | (25) | MCG                          | MCG                  |
| AM076830 | uncultured crenarchaeote                         | (25) | MCG-5                        | MCG                  |
| AM942159 | uncultured crenarchaeote                         | (25) | MCG-16                       | MCG                  |
| FJ901453 | uncultured crenarchaeote                         | (25) | MCG-5                        | MCG                  |
| FJ901475 | uncultured crenarchaeote                         | (25) | MCG-10                       | MCG                  |
| FJ901670 | uncultured crenarchaeote                         | (25) | MCG-8                        | MCG                  |
| FJ901681 | uncultured crenarchaeote                         | (25) | MCG-5                        | MCG                  |
| FJ901720 | uncultured crenarchaeote                         | (25) | MCG-3                        | MCG                  |
| FJ901972 | uncultured crenarchaeote                         | (25) | MCG-9                        | MCG                  |
| FJ902673 | uncultured crenarchaeote                         | (25) | MCG-9                        | MCG                  |
| AF095270 | <i>Methanoculleus bourgenis</i>                  | (3)  | Methanoculleus               | Methanoculleus       |
| M59130   | <i>Methanogenium cariaci</i>                     | (3)  | Methanogenium                | Methanogenium        |
| M59133   | <i>Methanohalophilus mahii</i> DSM 5219          | (3)  | Methanohalophilus            | Methanohalophilus    |
| U20154   | <i>Methanobolus taylorii</i>                     | (3)  | Methanobolus                 | Methanobolus         |
| AF120163 | <i>Methanomethylovorans hollandica</i> DSM 15978 | (3)  | Methanomethylovorans         | Methanomethylovorans |
| AF028691 | <i>Methanosarcina mazei</i>                      | (3)  | Methanosarcina               | Methanosarcina       |
| M60880   | <i>Methanospirillum hungatei</i>                 | (3)  | Methanospirillum             | Methanospirillum     |
| DQ085097 | <i>Nitrosopumilus maritimus</i> SCM1             | (3)  | MG-I                         | Nitrosopumilus       |
| X84901   | <i>Picrophilus oshimae</i>                       | (3)  | Thermoplasmatales            | Picrophilus          |
| M38637   | <i>Thermoplasma acidophilum</i>                  | (3)  | Thermoplasmatales            | Thermoplasma         |
| AB161329 | uncultured archaeon                              | (3)  | Methanosarcinales            | Methanosarcinales    |
| AF354126 | uncultured archaeon                              | (3)  | ANME-1b                      | ANME-1               |
| AF354128 | uncultured archaeon                              | (3)  | ANME-2b                      | ANME-2               |
| AF354136 | uncultured archaeon                              | (3)  | ANME-3                       | ANME-3               |
| AF354138 | uncultured archaeon                              | (3)  | ANME-2b                      | ANME-2               |
| AJ579313 | uncultured archaeon                              | (3)  | MBG-B / DSAG                 | MBG-B                |
| AJ969751 | uncultured archaeon                              | (3)  | MBG-D / MGIII                | MBG-D                |
| AY324375 | uncultured archaeon                              | (3)  | ANME-1b                      | ANME-1               |
| AY367345 | uncultured archaeon                              | (3)  | MBG-B / DSAG                 | MBG-B                |
| AY592809 | uncultured archaeon                              | (3)  | ANME-2a                      | ANME-2ab             |
| AY835408 | uncultured archaeon                              | (3)  | MBG-B / DSAG                 | MBG-B                |
| AF142981 | uncultured archaeon BURTON2_A                    | (3)  | MBG-D / MGIII                | MBG-D                |
| AF134388 | uncultured archaeon TA1c9                        | (3)  | MBG-D / MGIII                | MBG-D                |
| AF134390 | uncultured archaeon TA1f2                        | (3)  | MBG-D / MGIII                | MBG-D                |
| AF050620 | uncultured archaeon WCHD3-34                     | (3)  | Methanomicrobiales relatives | Methanocellales      |
| AB072723 | uncultured bacterium                             | (3)  | MBG-B / DSAG                 | MBG-B                |
| AJ578114 | uncultured crenarchaeote                         | (3)  | MBG-B / DSAG                 | MBG-B                |
| AY320199 | uncultured crenarchaeote                         | (3)  | MG-I                         | MG-I                 |
| AY436512 | uncultured crenarchaeote                         | (3)  | MBG-B / DSAG                 | MBG-B                |
| AB114309 | uncultured euryarchaeote                         | (3)  | Methanosarcinales            | Methanosarcinales    |
| AY211707 | uncultured euryarchaeote                         | (3)  | ANME-1b                      | ANME-1               |
| AY436523 | uncultured euryarchaeote                         | (3)  | MBG-D / MGIII                | MBG-D                |
| AY542191 | uncultured euryarchaeote                         | (3)  | ANME-1b                      | ANME-1               |
| AY211686 | uncultured Methanosarcinales archaeon            | (3)  | ANME-2c                      | ANME-2c              |
| AY211703 | uncultured Methanosarcinales archaeon            | (3)  | GoM-ArcI                     | GoM-ArcI             |
| AY542184 | uncultured Methanosarcinales archaeon            | (3)  | GoM-ArcI                     | GoM-ArcI             |
| AY211690 | uncultured Thermoplasmatales archaeon            | (3)  | Thermoplasmatales            | Thermoplasmatales    |
| AY211714 | uncultured Thermoplasmatales archaeon            | (3)  | Thermoplasmatales            | Thermoplasmatales    |
| AY323215 | uncultured Thermoplasmatales archaeon            | (3)  | MBG-D / MGIII                | MBG-D                |
| AY323220 | uncultured Thermoplasmatales archaeon            | (3)  | MBG-D / MGIII                | MBG-D                |
| AB019737 | unidentified archaeon                            | (3)  | MBG-D / MGIII                | MBG-D                |
| AB019758 | unidentified archaeon                            | (3)  | ANME-1a                      | ANME-1               |
| AF354137 | uncultured archaeon                              | (4)  | ANME-1                       | ANME-1               |
| AJ578091 | uncultured archaeon                              | (4)  | MBG-D                        | MBG-D                |
| AJ578128 | uncultured archaeon                              | (4)  | ANME-2b                      | ANME-2ab             |
| AY354120 | uncultured archaeon                              | (4)  | MBG-E                        | MBG-E                |
| AY835423 | uncultured archaeon                              | (4)  | TMEG                         | Thermoplasmatales    |
| DQ521781 | uncultured archaeon                              | (4)  | MBG-D                        | MBG-D                |
| AF134387 | uncultured archaeon TA1a9                        | (4)  | ANME-1                       | ANME-1               |
| AB019737 | unidentified archaeon                            | (4)  | MBG-D                        | MBG-D                |
| AB252424 | uncultured archaeon                              | (5)  | ANME-2ab                     | ANME-2ab             |
| AF419650 | uncultured archaeon                              | (5)  | ANME-2c                      | ANME-2c              |
| AJ578088 | uncultured archaeon                              | (5)  | ANME-2ab                     | ANME-2ab             |
| AJ578119 | uncultured archaeon                              | (5)  | ANME-3                       | ANME-3               |
| AJ578122 | uncultured archaeon                              | (5)  | ANME-2ab                     | ANME-2ab             |
| AJ890142 | uncultured archaeon                              | (5)  | ANME-2c                      | ANME-2c              |
| AY835421 | uncultured archaeon                              | (5)  | Methanosarcinales            | Methanosarcinales    |
| AY835422 | uncultured archaeon                              | (5)  | MBG-D                        | Thermoplasmatales    |
| AY835426 | uncultured archaeon                              | (5)  | GEG                          | GEG                  |
| DQ004668 | uncultured archaeon                              | (5)  | ANME-2c                      | ANME-2c              |
| DQ521782 | uncultured archaeon                              | (5)  | GoM-ArcI                     | GoM-ArcI             |
| DQ522919 | uncultured archaeon                              | (5)  | ANME-1                       | ANME-1               |
| DQ640158 | uncultured archaeon                              | (5)  | MBG-D                        | MBG-D                |
| EF687612 | uncultured archaeon                              | (5)  | GoM-ArcI                     | GoM-ArcI             |
| EU280197 | uncultured archaeon                              | (5)  | MBG-D                        | MBG-B                |
| AM745179 | uncultured euryarchaeote                         | (5)  | Methanosarcinales            | Methanosarcinales    |
| AM745239 | uncultured euryarchaeote                         | (5)  | ANME-1                       | ANME-1               |
| AM745242 | uncultured euryarchaeote                         | (5)  | MBG-D                        | MBG-D                |
| DQ084449 | uncultured Methanosarcinales archaeon            | (5)  | ANME-2c                      | ANME-2c              |
| DQ084450 | uncultured Methanosarcinales archaeon            | (5)  | ANME-2ab                     | ANME-2ab             |
| DQ084451 | uncultured Methanosarcinales archaeon            | (5)  | ANME-2c                      | ANME-2c              |
| DQ084452 | uncultured Methanosarcinales archaeon            | (5)  | ANME-2ab                     | ANME-2ab             |
| AB447467 | <i>Methanolinea mesophila</i>                    | (26) | Methanomicrobiales           | Methanolinea         |
| AJ133791 | <i>Methanosaepta</i> sp.                         | (26) | Methanosarcinales            | Methanosaepta        |
| AB252423 | uncultured archaeon                              | (26) | ANME-2c                      | ANME-2c              |
| AB252425 | uncultured archaeon                              | (26) | MBG-D                        | MBG-D                |
| AB252487 | uncultured archaeon                              | (26) | MBG-B                        | MBG-B                |
| AF419644 | uncultured archaeon                              | (26) | ANME-2c                      | ANME-2c              |
| AJ578098 | uncultured archaeon                              | (26) | ANME-2c                      | ANME-2c              |
| AJ578148 | uncultured archaeon                              | (26) | MBG-B                        | MHVG                 |
| AJ579329 | uncultured archaeon                              | (26) | ANME-3                       | ANME-3               |
| AY835411 | uncultured archaeon                              | (26) | MBG-B                        | MBG-B                |
| AY835414 | uncultured archaeon                              | (26) | Methanomicrobiales           | Methanomicrobiales   |
| AY835417 | uncultured archaeon                              | (26) | Methanosarcinales            | Methanosarcinales    |
| DQ004666 | uncultured archaeon                              | (26) | MBG-B                        | MHVG                 |
| DQ522940 | uncultured archaeon                              | (26) | MBG-B                        | MHVG                 |
| DQ640142 | uncultured archaeon                              | (26) | MBG-B                        | MBG-B                |
| EF687578 | uncultured archaeon                              | (26) | MBG-D                        | Thermoplasmatales    |
| FJ649533 | uncultured archaeon                              | (26) | MBG-B                        | MBG-B                |
| FJ712383 | uncultured archaeon                              | (26) | MBG-D                        | MBG-D                |
| FM179865 | uncultured archaeon                              | (26) | ANME-2c                      | ANME-2c              |
| FN820412 | uncultured archaeon                              | (26) | MBG-D                        | Thermoplasmatales    |
| GU190973 | uncultured archaeon                              | (26) | Archaea                      | DHVE-8               |
| GU190993 | uncultured archaeon                              | (26) | MBG-D                        | MBG-D                |
| AM229237 | uncultured euryarchaeote                         | (26) | MBG-D                        | Thermoplasmatales    |
| AM229255 | uncultured euryarchaeote                         | (26) | Archaea                      | DHVE-8               |
| AM745258 | uncultured euryarchaeote                         | (26) | ANME-1                       | ANME-1               |
| DQ084452 | uncultured Methanosarcinales archaeon            | (26) | ANME-2a                      | ANME-2ab             |
| EF069341 | uncultured Nitrosopumilales archaeon             | (26) | MG-I                         | MG-I                 |
| EF069366 | uncultured Nitrosopumilales archaeon             | (26) | MG-I                         | MG-I                 |

|          |                                          |      |                    |                    |
|----------|------------------------------------------|------|--------------------|--------------------|
| EF069376 | uncultured Nitrosopumilales archaeon     | (26) | MG-I               | MG-I               |
| AB019720 | unidentified archaeon                    | (26) | MBG-B              | MBG-B              |
| M35966   | <i>Thermoproteus tenax</i>               | (27) | Thermoproteus      | Thermoproteus      |
| AB094516 | uncultured archaeon                      | (27) | MBG-B              | MBG-B              |
| AB094518 | uncultured archaeon                      | (27) | MBG-B              | MBG-B              |
| AB094555 | uncultured archaeon                      | (27) | MBG-B              | MBG-B              |
| AB176997 | uncultured archaeon                      | (27) | MBG-B              | MBG-B              |
| AB176998 | uncultured archaeon                      | (27) | MCG                | MCG                |
| AB177000 | uncultured archaeon                      | (27) | SAGMEG-I           | SAGMEG             |
| AB177001 | uncultured archaeon                      | (27) | MCG-1              | MCG                |
| AB177002 | uncultured archaeon                      | (27) | SAGMEG-I           | SAGMEG             |
| AB177007 | uncultured archaeon                      | (27) | MCG                | MCG                |
| AB177015 | uncultured archaeon                      | (27) | MCG-3              | MCG                |
| AB177019 | uncultured archaeon                      | (27) | MBG-D              | MBG-D              |
| AB177025 | uncultured archaeon                      | (27) | MBG-B              | MBG-B              |
| AB177028 | uncultured archaeon                      | (27) | SAGMEG-I           | SAGMEG             |
| AB177029 | uncultured archaeon                      | (27) | TMEG               | Thermoplasmatales  |
| AB177030 | uncultured archaeon                      | (27) | MBG-D              | MBG-D              |
| AB177032 | uncultured archaeon                      | (27) | SAGMEG relatives   | SAGMEG             |
| AB177121 | uncultured archaeon                      | (27) | MBG-D              | MBG-D              |
| AB177265 | uncultured archaeon                      | (27) | SAGMEG-I           | SAGMEG             |
| AB177269 | uncultured archaeon                      | (27) | VALIII             | VALIII-a           |
| AB177272 | uncultured archaeon                      | (27) | MCG-1              | MCG                |
| AB177274 | uncultured archaeon                      | (27) | MCG-1              | MCG                |
| AB177279 | uncultured archaeon                      | (27) | MCG-3              | MCG                |
| AB177285 | uncultured archaeon                      | (27) | MBG-D              | MBG-D              |
| AB237746 | uncultured archaeon                      | (27) | SAGMEG relatives   | SAGMEG             |
| AJ578126 | uncultured archaeon                      | (27) | MBG-B              | MBG-B              |
| AJ867778 | uncultured archaeon                      | (27) | SAGMEG-I           | SAGMEG             |
| AJ867783 | uncultured archaeon                      | (27) | SAGMEG relatives   | SAGMEG             |
| AJ867785 | uncultured archaeon                      | (27) | MCG-3              | MCG                |
| AJ867791 | uncultured archaeon                      | (27) | MCG                | MCG                |
| AJ867792 | uncultured archaeon                      | (27) | MCG                | MCG                |
| AJ867794 | uncultured archaeon                      | (27) | MCG-1              | MCG                |
| AJ867799 | uncultured archaeon                      | (27) | MCG-1              | MCG                |
| AJ867801 | uncultured archaeon                      | (27) | MCG-1              | MCG                |
| AJ867807 | uncultured archaeon                      | (27) | MBG-B              | MBG-B              |
| AJ867808 | uncultured archaeon                      | (27) | MCG-4              | MCG                |
| AF005759 | uncultured archaeon Arc.75               | (27) | MCG                | MCG                |
| AF119132 | uncultured archaeon CRA4-23cm            | (27) | MBG-B              | MBG-B              |
| AB050242 | uncultured archaeon SAGMA-12             | (27) | SAGMEG-II          | SAGMEG             |
| AB050245 | uncultured archaeon SAGMA-15             | (27) | SAGMEG-II          | SAGMEG             |
| AB050212 | uncultured archaeon SAGMA-H              | (27) | SAGMEG-II          | SAGMEG             |
| AF134389 | uncultured archaeon TA1e6                | (27) | MBG-D              | MBG-D              |
| AY436513 | uncultured crenarchaeote                 | (27) | MBG-B              | MBG-B              |
| AJ131266 | uncultured euryarchaeote VAL112          | (27) | VALIII             | VALIII-a           |
| AJ131270 | uncultured euryarchaeote VAL84           | (27) | VALIII             | VALIII-b           |
| AB019715 | unidentified archaeon                    | (27) | AAG                | AAG                |
| AB355986 | <i>Haloarcula japonica</i>               | (28) | Haloarcula         | Haloarcula         |
| AB355987 | <i>Haloarcula marismortui</i>            | (28) | Haloarcula         | Haloarcula         |
| AB355988 | <i>Haloarcula quadrata</i>               | (28) | Haloarcula         | Haloarcula         |
| DQ167232 | <i>Thermococcus onnurineus</i> NA1       | (28) | Thermococcus       | Thermococcus       |
| AB094525 | uncultured archaeon                      | (28) | MHVG               | MHVG               |
| AB094549 | uncultured archaeon                      | (28) | MBG-D / MGIII      | MBG-D              |
| AB094550 | uncultured archaeon                      | (28) | MBG-B / DSAG       | MBG-B              |
| AB176996 | uncultured archaeon                      | (28) | MCG-4              | MCG                |
| AB176999 | uncultured archaeon                      | (28) | MBG-B / DSAG       | MBG-B              |
| AB177012 | uncultured archaeon                      | (28) | MCG-3              | MCG                |
| AB177016 | uncultured archaeon                      | (28) | MCG-3              | MCG                |
| AB177023 | uncultured archaeon                      | (28) | SAGMEG             | SAGMEG             |
| AB177097 | uncultured archaeon                      | (28) | MG-II              | MG-II              |
| AB177100 | uncultured archaeon                      | (28) | MG-I               | MG-I               |
| AB177229 | uncultured archaeon                      | (28) | MHVG               | MHVG               |
| AJ867784 | uncultured archaeon                      | (28) | SAGMEG             | SAGMEG             |
| AJ867787 | uncultured archaeon                      | (28) | MCG-4              | MCG                |
| AJ867790 | uncultured archaeon                      | (28) | MCG-3              | MCG                |
| AJ867796 | uncultured archaeon                      | (28) | MCG                | MCG                |
| AJ867797 | uncultured archaeon                      | (28) | MCG-3              | MCG                |
| AY093446 | uncultured archaeon                      | (28) | MCG                | MCG                |
| AY093448 | uncultured archaeon                      | (28) | MBG-B / DSAG       | MBG-B              |
| AY093454 | uncultured archaeon                      | (28) | SAGMEG             | SAGMEG             |
| DQ301966 | uncultured archaeon                      | (28) | SAGMEG             | SAGMEG             |
| DQ301972 | uncultured archaeon                      | (28) | TMEG               | Thermoplasmatales  |
| DQ301975 | uncultured archaeon                      | (28) | MCG-4              | MCG                |
| DQ301976 | uncultured archaeon                      | (28) | MCG-2              | MCG                |
| DQ301988 | uncultured archaeon                      | (28) | MCG-3              | MCG                |
| DQ841225 | uncultured archaeon                      | (28) | DHVE-6             | DHVE-6             |
| AF119143 | uncultured archaeon ACA10-0cm            | (28) | MBG-A              | MBG-A              |
| AF119139 | uncultured archaeon APA6-17cm            | (28) | MBG-E              | MBG-E              |
| AB050214 | uncultured archaeon SAGMA-J              | (28) | SAGMEG             | SAGMEG             |
| AB050225 | uncultured archaeon SAGMA-T              | (28) | TMEG               | Thermoplasmatales  |
| AY800206 | uncultured crenarchaeote                 | (28) | MBG-B / DSAG       | MBG-B              |
| AY800216 | uncultured crenarchaeote                 | (28) | MBG-A              | MBG-A              |
| AY800232 | uncultured crenarchaeote                 | (28) | MG-I               | MG-I               |
| AB019716 | unidentified archaeon                    | (28) | AAG                | AAG                |
| AB019717 | unidentified archaeon                    | (28) | AAG                | AAG                |
| AB019721 | unidentified archaeon                    | (28) | MBG-B / DSAG       | MBG-B              |
| AB019753 | unidentified archaeon                    | (28) | DHVE-6             | DHVE-6             |
| AB019756 | unidentified archaeon                    | (28) | DHVE-6             | DHVE-6             |
| Y10011   | <i>Archaeoglobus veneficus</i>           | (7)  | Archaeoglobales    | Archaeoglobus      |
| X99565   | <i>Ferroplasma placidus</i> DSM 10642    | (7)  | Archaeoglobales    | Ferroplasma        |
| L37444   | <i>Halobaculum gomorrense</i>            | (7)  | Halobacteriales    | Halobaculum        |
| X00662   | <i>Halococcus morrhuae</i>               | (7)  | Halobacteriales    | Halococcus         |
| D11107   | <i>Haloferax mediterranei</i> ATCC 33500 | (7)  | Halobacteriales    | Haloferax          |
| AJ238002 | <i>Methanomicrococcus blatticola</i>     | (7)  | Methanomicrococcus | Methanomicrococcus |
| M59124   | <i>Methanobacterium bryantii</i>         | (7)  | Methanobacteriales | Methanobacterium   |
| X99044   | <i>Methanobacterium subterraneum</i>     | (7)  | Methanobacteriales | Methanobacterium   |
| AF025822 | <i>Methanocaldococcus infernus</i>       | (7)  | Methanococcales    | Methanococcus      |
| M59126   | <i>Methanocaldococcus jannaschii</i>     | (7)  | Methanococcales    | Methanococcus      |
| M59127   | <i>Methanocaldococcus methylutens</i>    | (7)  | Methylococcales    | Methylococcales    |
| M36507   | <i>Methanococcus vannielii</i>           | (7)  | Methanococcales    | Methanococcus      |
| M59147   | <i>Methanocorpusculum parvum</i>         | (7)  | Methanomicrobiales | Methanocorpusculum |
| M59134   | <i>Methanoculleus marisnigri</i>         | (7)  | Methanomicrobiales | Methanogenium      |
| M59129   | <i>Methanoculleus thermophilus</i>       | (7)  | Methanomicrobiales | Methanogenium      |
| M59131   | <i>Methanogenium organophilum</i>        | (7)  | Methanomicrobiales | Methanogenium      |
| U20152   | <i>Methanohalobium oregonensis</i>       | (7)  | Methanohalobus     | Methanohalobus     |
| M59135   | <i>Methanohalobium tindarium</i>         | (7)  | Methanohalobus     | Methanohalobus     |
| M59142   | <i>Methanomicrobium mobile</i> BP        | (7)  | Methanomicrobiales | Methanomicrobium   |
| M59143   | <i>Methanoplanus limicola</i> DSM 2279   | (7)  | Methanomicrobiales | Methanoplanus      |
| M59932   | <i>Methanopyrus kandleri</i>             | (7)  | Methanopyrus       | Methanopyrus       |
| X16932   | <i>Methanoseta concilii</i>              | (7)  | Methanothrix       | Methanothrix       |
| M59141   | <i>Methanoseta thermophila</i>           | (7)  | Methanothrix       | Methanothrix       |
| AJ012094 | <i>Methanosarcina barkeri</i>            | (7)  | Methanosarcina     | Methanosarcina     |
| M59140   | <i>Methanosarcina thermophila</i> TM-1   | (7)  | Methanosarcina     | Methanosarcina     |
| M59139   | <i>Methanosphaera stadtmanae</i>         | (7)  | Methanobacteriales | Methanosphaera     |
| AJ225071 | <i>Pyrococcus abyssi</i>                 | (7)  | Pyrococcus         | Pyrococcus         |
| M21087   | <i>Pyrodicticum occultum</i>             | (7)  | Desulfurococcales  | Pyrodicticum       |

|          |                                                 |      |                    |                    |
|----------|-------------------------------------------------|------|--------------------|--------------------|
| Z70244   | <i>Thermococcus hydrothermalis</i>              | (7)  | Thermococcus       | Thermococcus       |
| AF354129 | uncultured archaeon                             | (7)  | ANME-2c            | ANME-2c            |
| AF354132 | uncultured archaeon                             | (7)  | Methanosarcinales  | Methanosarcinales  |
| AF419627 | uncultured archaeon                             | (7)  | ANME-1a            | ANME-1             |
| AF419628 | uncultured archaeon                             | (7)  | Archaeoglobales    | Archaeoglobales    |
| AF419629 | uncultured archaeon                             | (7)  | Unaffiliated       | GEG                |
| AF419633 | uncultured archaeon                             | (7)  | Thermoprotei       | Thermoprotei       |
| AF419634 | uncultured archaeon                             | (7)  | Methanomicrobiales | Methanomicrobiales |
| AF419637 | uncultured archaeon                             | (7)  | Archaeoglobales    | Archaeoglobales    |
| AF419639 | uncultured archaeon                             | (7)  | Korarchaeota       | Korarchaeota       |
| AF419640 | uncultured archaeon                             | (7)  | Thermococcales     | Thermococcales     |
| AF419641 | uncultured archaeon                             | (7)  | Thermococcales     | Thermococcales     |
| AF419646 | uncultured archaeon                             | (7)  | MPAG-I             | MG-I               |
| AF419647 | uncultured archaeon                             | (7)  | ANME-2c            | ANME-2c            |
| AF419649 | uncultured archaeon                             | (7)  | ANME-1a            | ANME-1             |
| AF419651 | uncultured archaeon                             | (7)  | Unaffiliated       | GEG                |
| AF419652 | uncultured archaeon                             | (7)  | ANME-1a            | ANME-1             |
| AF419654 | uncultured archaeon                             | (7)  | ANME-1a            | ANME-1             |
| AF419656 | uncultured archaeon                             | (7)  | Unaffiliated       | GEG                |
| AF004343 | uncultured crenarchaeote                        | (7)  | Crenarchaeota      | MCG-15             |
| AF004344 | uncultured crenarchaeote                        | (7)  | Crenarchaeota      | MCG-17             |
| L25303   | uncultured korarchaeote pJP78                   | (7)  | Korarchaeota       | Korarchaeota       |
| AB007304 | unidentified archaeon                           | (7)  | Korarchaeota       | Korarchaeota       |
| AB019759 | unidentified archaeon                           | (7)  | ANME-1a            | ANME-1             |
| D87350   | unculturable Mariana archaeon no. 15            | (29) | MG-I alpha         | MG-I               |
| AB072725 | uncultured archaeon                             | (29) | MG-I zeta          | MG-I               |
| AB094513 | uncultured archaeon                             | (29) | MCG                | MCG                |
| AB094515 | uncultured archaeon                             | (29) | MBG-D              | MBG-D              |
| AB094523 | uncultured archaeon                             | (29) | DSAG / MBG-B       | MBG-B              |
| AB094527 | uncultured archaeon                             | (29) | MBG-D              | MBG-D              |
| AB094530 | uncultured archaeon                             | (29) | SAGMEG-I           | SAGMEG             |
| AB094531 | uncultured archaeon                             | (29) | DSAG / MBG-B       | MBG-B              |
| AB094532 | uncultured archaeon                             | (29) | DSAG / MBG-B       | MBG-B              |
| AB094540 | uncultured archaeon                             | (29) | MCG                | MCG                |
| AB094545 | uncultured archaeon                             | (29) | SAGMEG-I           | SAGMEG             |
| AB094546 | uncultured archaeon                             | (29) | MCG                | MCG-6              |
| AB094547 | uncultured archaeon                             | (29) | MCG                | MCG                |
| AB094548 | uncultured archaeon                             | (29) | MCG                | MCG                |
| AB094560 | uncultured archaeon                             | (29) | MCG                | MCG-6              |
| AF355807 | uncultured archaeon                             | (29) | DSAG / MBG-B       | MBG-B              |
| AF418925 | uncultured archaeon                             | (29) | MCG                | MCG-6              |
| AF418931 | uncultured archaeon                             | (29) | TMEG               | Thermoplasmatales  |
| AF418940 | uncultured archaeon                             | (29) | TMEG               | Thermoplasmatales  |
| AF419642 | uncultured archaeon                             | (29) | DSAG / MBG-B       | MBG-B              |
| AF419643 | uncultured archaeon                             | (29) | MBG-D              | MBG-D              |
| AF419653 | uncultured archaeon                             | (29) | MCG                | MCG-13             |
| AV093447 | uncultured archaeon                             | (29) | MCG                | MCG                |
| AV093451 | uncultured archaeon                             | (29) | MCG                | MCG                |
| AY166110 | uncultured archaeon                             | (29) | UCII-b             | UCII-b             |
| AY166117 | uncultured archaeon                             | (29) | UCII-b             | UCII-b             |
| AY661815 | uncultured archaeon                             | (29) | Peru Basin Group   | Peru Basin Group   |
| AY661817 | uncultured archaeon                             | (29) | Peru Basin Group   | Peru Basin Group   |
| AY661819 | uncultured archaeon                             | (29) | UCII-b             | UCII-b             |
| AY661820 | uncultured archaeon                             | (29) | UCII-b             | UCII-b             |
| AY661825 | uncultured archaeon                             | (29) | DSAG / MBG-B       | MBG-B              |
| AY661826 | uncultured archaeon                             | (29) | SAGMEG-I           | SAGMEG             |
| AY661827 | uncultured archaeon                             | (29) | SAGMEG-I           | SAGMEG             |
| AY661829 | uncultured archaeon                             | (29) | DHVE-6             | MBG-E              |
| AY661833 | uncultured archaeon                             | (29) | MG-I eta           | MG-I               |
| AY661834 | uncultured archaeon                             | (29) | MG-I eta           | MG-I               |
| AY661846 | uncultured archaeon                             | (29) | MG-I alpha         | MG-I               |
| AJ299151 | uncultured archaeon 20a-6                       | (29) | UCII-b             | UCII-b             |
| AF015992 | uncultured archaeon 2MT8                        | (29) | MBG-D              | MBG-D              |
| AF119145 | uncultured archaeon ACA17-9cm                   | (29) | MG-I epsilon       | MG-I               |
| AF119146 | uncultured archaeon ACA3-0cm                    | (29) | MG-I zeta          | MG-I               |
| AF119135 | uncultured archaeon APA2-17cm                   | (29) | MBG-A              | MBG-A              |
| AF119138 | uncultured archaeon APA4-0cm                    | (29) | MG-I alpha         | MG-I               |
| AF005754 | uncultured archaeon Arc.3                       | (29) | MCG                | MCG                |
| AF005758 | uncultured archaeon Arc.43                      | (29) | MCG                | MCG                |
| AF005756 | uncultured archaeon Arc.9                       | (29) | MCG                | MCG                |
| AF119123 | uncultured archaeon CRA12-27cm                  | (29) | MBG-D              | MBG-D              |
| AF119125 | uncultured archaeon CRA7-0cm                    | (29) | MG-I epsilon       | MG-I               |
| AB049030 | uncultured archaeon pPCA4.4                     | (29) | MG-I eta           | MG-I               |
| AB049031 | uncultured archaeon pPCA4.9                     | (29) | MG-I eta           | MG-I               |
| AB050239 | uncultured archaeon SAGMA-9                     | (29) | MG-I epsilon       | MG-I               |
| AB050209 | uncultured archaeon SAGMA-E                     | (29) | SAGMEG-I           | SAGMEG             |
| AB050222 | uncultured archaeon SAGMA-Q                     | (29) | SAGMEG-I           | SAGMEG             |
| AB050223 | uncultured archaeon SAGMA-R                     | (29) | SAGMEG-I           | SAGMEG             |
| AF068822 | uncultured archaeon VC2.1 Arc31                 | (29) | DSAG / MBG-B       | MBG-B              |
| AF050616 | uncultured archaeon WCHD3-02                    | (29) | TMEG               | Thermoplasmatales  |
| AJ133622 | uncultured archeon 'KTK 9A'                     | (29) | MBG-D              | MBG-D              |
| AB072727 | uncultured bacterium                            | (29) | MG-I eta           | MG-I               |
| AB015273 | uncultured crenarchaeote                        | (29) | MCG                | MCG                |
| AY436511 | uncultured crenarchaeote                        | (29) | DSAG / MBG-B       | MBG-B              |
| AY436515 | uncultured crenarchaeote                        | (29) | MCG                | MCG                |
| AY436519 | uncultured crenarchaeote                        | (29) | MCG                | MCG                |
| AY800207 | uncultured crenarchaeote                        | (29) | DSAG / MBG-B       | MBG-B              |
| AY800212 | uncultured crenarchaeote                        | (29) | MBG-A              | MBG-A              |
| AY800218 | uncultured crenarchaeote                        | (29) | MG-I zeta          | MG-I               |
| AY800219 | uncultured crenarchaeote                        | (29) | MG-I epsilon       | MG-I               |
| U59986   | uncultured crenarchaeote                        | (29) | MCG                | MCG-6              |
| U63339   | uncultured crenarchaeote                        | (29) | MCG                | MCG                |
| U63343   | uncultured crenarchaeote                        | (29) | MBG-A              | MBG-A              |
| U63345   | uncultured crenarchaeote                        | (29) | MCG                | MCG                |
| U78199   | uncultured crenarchaeote                        | (29) | MG-I gamma         | MG-I               |
| AY436522 | uncultured euryarchaeote                        | (29) | MBG-D              | MBG-D              |
| AY436524 | uncultured euryarchaeote                        | (29) | MBG-D              | MBG-D              |
| AB019723 | unidentified archaeon                           | (29) | MG-I alpha         | MG-I               |
| AB019728 | unidentified archaeon                           | (29) | MG-I gamma         | MG-I               |
| AB019738 | unidentified archaeon                           | (29) | MBG-D              | MBG-D              |
| AB019754 | unidentified archaeon                           | (29) | DHVE-6             | MBG-E              |
| M88075   | unidentified archaeon                           | (29) | MG-I alpha         | MG-I               |
| FJ555678 | archaeon enrichment culture clone AOM-Clone-D10 | (30) | ANME-2             | ANME-2ab           |
| HQ405741 | archaeon enrichment culture clone AOM-SR-A55    | (30) | ANME-2a            | ANME-2ab           |
| AF028689 | <i>Methanobacterium formicum</i>                | (30) | Methanobacterium   | Methanobacterium   |
| X65537   | <i>Methanococcoides burtonii</i>                | (30) | Methanococcoides   | Methanococcoides   |
| U38486   | <i>Methanococcus maripaludis</i> C5             | (30) | Methanococcus      | Methanococcus      |
| DQ177345 | <i>Methanogenium marinum</i>                    | (30) | Methanogenium      | Methanogenium      |
| AB301476 | <i>Methanopyrus kandleri</i>                    | (30) | Methanopyrus       | Methanopyrus       |
| M59146   | <i>Methanoseta concilii</i>                     | (30) | Methanoseta        | Methanoseta        |
| AF028692 | <i>Methanosarcina barkeri</i>                   | (30) | Methanosarcinales  | Methanosarcina     |
| AB094542 | uncultured archaeon                             | (30) | TMEG               | Thermoplasmatales  |
| AB094544 | uncultured archaeon                             | (30) | MBG-B / DSAG       | MBG-B              |
| AB177092 | uncultured archaeon                             | (30) | MG-I               | MG-I               |
| AB177113 | uncultured archaeon                             | (30) | MG-II              | MG-II              |
| AF354139 | uncultured archaeon                             | (30) | ANME-2c            | ANME-2c            |
| AF419624 | uncultured archaeon                             | (30) | ANME-1a Guaymas I  | ANME-1             |

|          |                                 |      |                   |                   |
|----------|---------------------------------|------|-------------------|-------------------|
| AF419655 | uncultured archaeon             | (30) | ANME-1 Guaymas    | ANME-1 Guaymas    |
| AJ578089 | uncultured archaeon             | (30) | ANME-1b           | ANME-1            |
| AJ578095 | uncultured archaeon             | (30) | ANME-2c           | ANME-2c           |
| AJ578112 | uncultured archaeon             | (30) | ANME-2c           | ANME-2c           |
| AJ579327 | uncultured archaeon             | (30) | ANME-3            | ANME-3            |
| AJ579330 | uncultured archaeon             | (30) | ANME-3            | ANME-3            |
| AY592258 | uncultured archaeon             | (30) | TMEG              | Thermoplasmatales |
| AY835426 | uncultured archaeon             | (30) | MBG-E             | GEG               |
| DQ146762 | uncultured archaeon             | (30) | RC-V              | RC-V              |
| DQ301985 | uncultured archaeon             | (30) | MCG               | MCG               |
| DQ301997 | uncultured archaeon             | (30) | MBG-D             | MBG-D             |
| EF687522 | uncultured archaeon             | (30) | DHVE-8            | DHVE-8            |
| EU622304 | uncultured archaeon             | (30) | ANME-2c           | ANME-2c           |
| EU713867 | uncultured archaeon             | (30) | ANME-2c           | ANME-2c           |
| EU713911 | uncultured archaeon             | (30) | TMEG              | Thermoplasmatales |
| FJ712393 | uncultured archaeon             | (30) | MBG-D             | MBG-D             |
| GQ356887 | uncultured archaeon             | (30) | Methanosarcinales | Methanosarcinales |
| GU190971 | uncultured archaeon             | (30) | DHVE-8            | DHVE-8            |
| GU190984 | uncultured archaeon             | (30) | DHVE-8            | DHVE-8            |
| GU270148 | uncultured archaeon             | (30) | ANME-2c           | ANME-2c           |
| GU270162 | uncultured archaeon             | (30) | MCG               | MCG-6             |
| HE774517 | uncultured archaeon             | (30) | ANME-2c           | ANME-2c           |
| HE774518 | uncultured archaeon             | (30) | ANME-2c           | ANME-2c           |
| HE774519 | uncultured archaeon             | (30) | ANME-2c           | ANME-2c           |
| HE774520 | uncultured archaeon             | (30) | ANME-2c           | ANME-2c           |
| HE774521 | uncultured archaeon             | (30) | ANME-2c           | ANME-2c           |
| HE774522 | uncultured archaeon             | (30) | ANME-2c           | ANME-2c           |
| HE774523 | uncultured archaeon             | (30) | ANME-2c           | GoM-ArcI          |
| HE774524 | uncultured archaeon             | (30) | ANME-2c           | ANME-2c           |
| HE774525 | uncultured archaeon             | (30) | ANME-2c           | ANME-2c           |
| HE774526 | uncultured archaeon             | (30) | ANME-2c           | ANME-2c           |
| HE774527 | uncultured archaeon             | (30) | ANME-2c           | ANME-2c           |
| HE774528 | uncultured archaeon             | (30) | ANME-2c           | ANME-2c           |
| HE774529 | uncultured archaeon             | (30) | ANME-2c Sonora    | ANME-2c Sonora    |
| HE774530 | uncultured archaeon             | (30) | ANME-2c Sonora    | ANME-2c Sonora    |
| HE774531 | uncultured archaeon             | (30) | ANME-2c Sonora    | ANME-2c Sonora    |
| HE774532 | uncultured archaeon             | (30) | ANME-2a           | ANME-2ab          |
| HE774533 | uncultured archaeon             | (30) | ANME-2a           | ANME-2ab          |
| HE774534 | uncultured archaeon             | (30) | ANME-2a           | ANME-2ab          |
| HE774535 | uncultured archaeon             | (30) | ANME-2a           | ANME-2ab          |
| HE774536 | uncultured archaeon             | (30) | ANME-2            | ANME-2ab          |
| HE774537 | uncultured archaeon             | (30) | ANME-2            | ANME-2ab          |
| HE774538 | uncultured archaeon             | (30) | ANME-2            | ANME-2ab          |
| HE774539 | uncultured archaeon             | (30) | Methanosarcinales | GoM-ArcI          |
| HE774540 | uncultured archaeon             | (30) | Methanosarcinales | GoM-ArcI          |
| HE774541 | uncultured archaeon             | (30) | Methanosarcinales | ANME-2            |
| HE774542 | uncultured archaeon             | (30) | Methanosarcinales | ANME-2            |
| HE774543 | uncultured archaeon             | (30) | Methanosarcinales | Methanosarcinales |
| HE774544 | uncultured archaeon             | (30) | ANME-3            | ANME-3            |
| HE774545 | uncultured archaeon             | (30) | ANME-3            | ANME-3            |
| HE774546 | uncultured archaeon             | (30) | ANME-3            | ANME-3            |
| HE774547 | uncultured archaeon             | (30) | ANME-3            | ANME-3            |
| HE774548 | uncultured archaeon             | (30) | ANME-1b           | ANME-1            |
| HE774549 | uncultured archaeon             | (30) | ANME-1b           | ANME-1            |
| HE774550 | uncultured archaeon             | (30) | ANME-1b           | ANME-1            |
| HE774551 | uncultured archaeon             | (30) | ANME-1b           | ANME-1            |
| HE774552 | uncultured archaeon             | (30) | ANME-1b           | ANME-1            |
| HE774553 | uncultured archaeon             | (30) | MBG-D             | MBG-D             |
| HE774554 | uncultured archaeon             | (30) | MBG-D             | MBG-D             |
| HE774555 | uncultured archaeon             | (30) | MBG-D             | MBG-D             |
| HE774556 | uncultured archaeon             | (30) | MBG-D             | MBG-D             |
| HE774557 | uncultured archaeon             | (30) | MBG-D             | MBG-D             |
| HE774558 | uncultured archaeon             | (30) | MBG-D             | MBG-D             |
| HE774559 | uncultured archaeon             | (30) | TMEG              | Thermoplasmatales |
| HE774560 | uncultured archaeon             | (30) | TMEG              | Thermoplasmatales |
| HE774561 | uncultured archaeon             | (30) | TMEG              | Thermoplasmatales |
| HE774562 | uncultured archaeon             | (30) | TMEG              | Thermoplasmatales |
| HE774563 | uncultured archaeon             | (30) | TMEG              | Thermoplasmatales |
| HE774564 | uncultured archaeon             | (30) | TMEG              | Thermoplasmatales |
| HE774565 | uncultured archaeon             | (30) | TMEG              | Thermoplasmatales |
| HE774566 | uncultured archaeon             | (30) | TMEG              | Thermoplasmatales |
| HE774567 | uncultured archaeon             | (30) | TMEG              | Thermoplasmatales |
| HE774568 | uncultured archaeon             | (30) | TMEG              | Thermoplasmatales |
| HE774569 | uncultured archaeon             | (30) | TMEG              | Thermoplasmatales |
| HE774570 | uncultured archaeon             | (30) | TMEG              | Thermoplasmatales |
| HE774571 | uncultured archaeon             | (30) | TMEG              | Thermoplasmatales |
| HE774572 | uncultured archaeon             | (30) | TMEG              | Thermoplasmatales |
| HE774573 | uncultured archaeon             | (30) | TMEG              | Thermoplasmatales |
| HE774574 | uncultured archaeon             | (30) | MG-II             | MG-II             |
| HE774575 | uncultured archaeon             | (30) | Euryarchaeota     | Peru Basin Group  |
| HE774576 | uncultured archaeon             | (30) | DHVE-8            | DHVE-8            |
| HE774577 | uncultured archaeon             | (30) | DHVE-8            | DHVE-8            |
| HE774578 | uncultured archaeon             | (30) | DHVE-8            | DHVE-8            |
| HE774579 | uncultured archaeon             | (30) | DHVE-8            | DHVE-8            |
| HE774580 | uncultured archaeon             | (30) | DHVE-8            | DHVE-8            |
| HE774581 | uncultured archaeon             | (30) | DHVE-8            | DHVE-8            |
| HE774582 | uncultured archaeon             | (30) | DHVE-8            | DHVE-8            |
| HE774583 | uncultured archaeon             | (30) | DHVE-8            | DHVE-8            |
| HE774584 | uncultured archaeon             | (30) | RC-V              | RC-V              |
| HE774585 | uncultured archaeon             | (30) | RC-V              | RC-V              |
| HE774586 | uncultured archaeon             | (30) | RC-V              | RC-V              |
| HE774587 | uncultured archaeon             | (30) | RC-V              | RC-V              |
| HE774588 | uncultured archaeon             | (30) | MBG-E             | MBG-E             |
| HE774589 | uncultured archaeon             | (30) | MBG-E             | MBG-E             |
| HE774590 | uncultured archaeon             | (30) | MBG-E             | MBG-E             |
| HE774591 | uncultured archaeon             | (30) | MBG-B / DSAG      | MBG-B             |
| HE774592 | uncultured archaeon             | (30) | MBG-B / DSAG      | MBG-B             |
| HE774593 | uncultured archaeon             | (30) | MBG-B / DSAG      | MBG-B             |
| HE774594 | uncultured archaeon             | (30) | MG-I              | MG-I              |
| HE774595 | uncultured archaeon             | (30) | MG-I              | MG-I              |
| HE774596 | uncultured archaeon             | (30) | MG-I              | MG-I              |
| HE774598 | uncultured archaeon             | (30) | MCG               | MCG-6             |
| HE774599 | uncultured archaeon             | (30) | MCG               | MCG-6             |
| HE774600 | uncultured archaeon             | (30) | MCG               | MCG               |
| HE774601 | uncultured archaeon             | (30) | MBG-A             | MBG-A             |
| HE774602 | uncultured archaeon             | (30) | MBG-A             | MBG-A             |
| HE774603 | uncultured archaeon             | (30) | MBG-A             | MBG-A             |
| HM601365 | uncultured archaeon             | (30) | MBG-B / DSAG      | MBG-B             |
| HQ588672 | uncultured archaeon             | (30) | Methanosarcinales | ANME-2            |
| HQ588675 | uncultured archaeon             | (30) | Methanosarcinales | GoM-ArcI          |
| HQ588686 | uncultured archaeon             | (30) | ANME-2c           | ANME-2c           |
| JF268337 | uncultured archaeon             | (30) | ANME-3            | ANME-3            |
| JF268339 | uncultured archaeon             | (30) | ANME-2a           | ANME-2ab          |
| AF119124 | uncultured archaeon CRA113-11cm | (30) | MBG-E             | MBG-E             |
| AY800215 | uncultured crenarchaeote        | (30) | MBG-A             | MBG-A             |
| DQ417477 | uncultured euryarchaeote        | (30) | RC-V              | RC-V              |
| EF069336 | uncultured euryarchaeote        | (30) | TMEG              | Thermoplasmatales |

|          |                                              |      |               |                   |
|----------|----------------------------------------------|------|---------------|-------------------|
| EU731049 | uncultured euryarchaeote                     | (30) | RC-V          | RC-V              |
| AY211687 | uncultured Methanosarcinales archaeon        | (30) | ANME-2a       | ANME-2ab          |
| FN553721 | uncultured sediment archaeon                 | (30) | Euryarchaeota | Peru Basin Group  |
| HQ003701 | uncultured Thermoplasmata archaeon           | (30) | TMEG          | Thermoplasmatales |
| EU239960 | Candidatus <i>Nitrosocaldus yellowstonii</i> | /    | /             | Thaumarchaeota    |
| GU797786 | Candidatus <i>Nitrososphaera gargensis</i>   | /    | /             | Thaumarchaeota    |
| U51469   | <i>Cenarchaeum symbiosum</i>                 | /    | /             | Cenarchaeum       |
| AJ318041 | <i>Nanoarchaeum equitans</i>                 | /    | /             | Euryarchaeota     |
| JQ346765 | <i>Nitrosopumilus maritimus</i> SCM1         | /    | /             | Nitrosopumilus    |
| FR773157 | <i>Nitrososphaera viennensis</i> EN76        | /    | /             | Thaumarchaeota    |

|                                                                                   | Extraction | $\mu\text{g}$ of DNA / g of sediment |          | 260/280               |          | 260/230               |          |
|-----------------------------------------------------------------------------------|------------|--------------------------------------|----------|-----------------------|----------|-----------------------|----------|
|                                                                                   |            | Extraction replicates                | Averages | Extraction replicates | Averages | Extraction replicates | Averages |
| 1758 CT8 S <sub>C1</sub><br>Cold seeps, surface layer<br><i>Grey mat</i>          | Zhou       | 103.35                               | 101.68   | 1.89                  | 1.87     | 1.37                  | 1.36     |
|                                                                                   |            | 102.06                               |          | 1.85                  |          | 1.29                  |          |
|                                                                                   |            | 99.62                                |          | 1.88                  |          | 1.43                  |          |
|                                                                                   | Kit        | 28.49                                | 27.42    | 1.66                  | 1.63     | 0.61                  | 0.56     |
|                                                                                   |            | 29.17                                |          | 1.55                  |          | 0.59                  |          |
|                                                                                   |            | 25.68                                |          | 1.65                  |          | 0.49                  |          |
|                                                                                   |            | 26.33                                |          | 1.65                  |          | 0.53                  |          |
| 1758 CT8 S <sub>O6</sub><br>Cold seeps, bottom layer<br><i>Grey mat</i>           | Zhou       | 16.82                                | 17.67    | 1.58                  | 1.57     | 0.93                  | 0.90     |
|                                                                                   |            | 13.56                                |          | 1.6                   |          | 0.95                  |          |
|                                                                                   |            | 22.65                                |          | 1.52                  |          | 0.83                  |          |
|                                                                                   | Kit        | 20.44                                | 20.98    | 2.54                  | 2.31     | 0.47                  | 0.44     |
|                                                                                   |            | 16.13                                |          | 2.38                  |          | 0.31                  |          |
|                                                                                   |            | 27.14                                |          | 1.77                  |          | 0.53                  |          |
|                                                                                   |            | 20.19                                |          | 2.56                  |          | 0.43                  |          |
| 1766 CT3 S <sub>H1</sub><br>Hydrothermal vents, surface layer<br><i>White mat</i> | Zhou       | 33.74                                | 39.50    | 1.91                  | 1.90     | 1.31                  | 1.30     |
|                                                                                   |            | 52.62                                |          | 1.88                  |          | 1.26                  |          |
|                                                                                   |            | 32.14                                |          | 1.92                  |          | 1.34                  |          |
|                                                                                   | Kit        | 35.14                                | 35.04    | 2.14                  | 2.26     | 0.35                  | 0.50     |
|                                                                                   |            | 54.82                                |          | 2.29                  |          | 0.57                  |          |
|                                                                                   |            | 33.48                                |          | 2.36                  |          | 0.56                  |          |
|                                                                                   |            | 16.72                                |          | 2.24                  |          | 0.5                   |          |

**Table S3:** Quantity and quality of extracted DNA (for each extraction replicates and averaged between extraction replicates) evaluated by optical density using a Nanodrop spectrophotometer.



| Sample                                                                    | Extraction         | Number of reads before filtering |       |         |       | % of remaining sequences after filtering |        |         |        | Chimera proportion |       |         |       | Proportion of sequences from other kingdoms |       |         |       |
|---------------------------------------------------------------------------|--------------------|----------------------------------|-------|---------|-------|------------------------------------------|--------|---------|--------|--------------------|-------|---------|-------|---------------------------------------------|-------|---------|-------|
|                                                                           |                    | Bacteria                         |       | Archaea |       | Bacteria                                 |        | Archaea |        | Bacteria           |       | Archaea |       | Bacteria                                    |       | Archaea |       |
|                                                                           |                    | Bact1                            | Bact2 | Arch1   | Arch2 | Bact1                                    | Bact2  | Arch1   | Arch2  | Bact1              | Bact2 | Arch1   | Arch2 | Bact1                                       | Bact2 | Arch1   | Arch2 |
| 1758 CT3 S <sub>01</sub><br>Cold seeps surface layer<br>Grey.mat          | Zhou               | 2226                             | 8631  | 2343    | 4615  | 79.38%                                   | 66.06% | 56.68%  | 67.93% | 0.09%              | 0.30% | 0.17%   | 1.19% | 0.22%                                       | 0.00% | 3.37%   | 2.73% |
|                                                                           | Kit                | 3048                             | 7472  | 2397    | 4461  | 82.64%                                   | 67.34% | 55.86%  | 66.06% | 0.00%              | 0.12% | 0.67%   | 1.10% | 1.05%                                       | 0.00% | 7.63%   | 2.82% |
| 1758 CT3 S <sub>03</sub><br>Cold seeps bottom layer<br>Grey.mat           | Zhou               | 2522                             | 9662  | 3264    | 4661  | 66.26%                                   | 73.39% | 68.38%  | 70.29% | 0.00%              | 0.28% | 0.61%   | 0.47% | 3.41%                                       | 0.00% | 3.95%   | 0.11% |
|                                                                           | Kit                | 2606                             | 10672 | 2302    | 4533  | 58.33%                                   | 69.77% | 54.69%  | 68.59% | 0.00%              | 0.38% | 0.22%   | 1.54% | 2.88%                                       | 0.00% | 3.91%   | 0.13% |
| 1766 CT3 S <sub>11</sub><br>Hydrothermal vents surface layer<br>White.mat | Zhou - Replicate 1 | 2791                             | 11461 | 2068    | 4268  | 74.88%                                   | 67.93% | 66.97%  | 64.81% | 0.14%              | 0.15% | 1.02%   | 4.38% | 3.91%                                       | 0.00% | 0.19%   | 1.03% |
|                                                                           | Kit - Replicate 1  | 3145                             | 10879 | 2765    | 3968  | 69.83%                                   | 66.40% | 57.07%  | 60.26% | 0.03%              | 0.20% | 0.47%   | 4.64% | 5.47%                                       | 0.00% | 0.22%   | 0.66% |
|                                                                           | Zhou - Replicate 2 | 2735                             | 10992 | 2575    | 4110  | 65.23%                                   | 65.62% | 51.22%  | 62.51% | 0.33%              | 0.19% | 0.66%   | 4.77% | 1.10%                                       | 0.00% | 0.31%   | 0.97% |
|                                                                           | Kit - Replicate 2  | 4143                             | 12572 | 3771    | 4302  | 71.59%                                   | 65.13% | 51.87%  | 64.71% | 0.17%              | 0.29% | 0.29%   | 3.72% | 4.30%                                       | 0.00% | 0.29%   | 1.14% |

**Table S4:** Numbers of reads before (total 161960 reads) and after filtering (total 107567 reads) for all samples according to primer set and DNA extraction method used. Proportion of detected chimera and sequences amplified from other kingdoms.

| BACTERIA<br>Yue & Clayton                                                 |                     | 1758 CT8 SC <sub>1</sub><br>Cold seeps surface layer<br>day mat |                | 1758 CT8 SC <sub>2</sub><br>Cold seeps bottom layer<br>day mat |                | 1766 CT3 S <sub>41</sub><br>Hydrothermal vents surface layer<br>White mat |                   |                     |
|---------------------------------------------------------------------------|---------------------|-----------------------------------------------------------------|----------------|----------------------------------------------------------------|----------------|---------------------------------------------------------------------------|-------------------|---------------------|
|                                                                           |                     | Zhou                                                            | Kt             | Zhou                                                           | Kt             | Zhou<br>Replicate 1                                                       | Kt<br>Replicate 1 | Zhou<br>Replicate 2 |
|                                                                           |                     | 1758 CT8 SC <sub>1</sub><br>Cold seeps surface layer<br>day mat | Kt             | 0.129<br>0.063                                                 |                |                                                                           |                   |                     |
| 1758 CT8 SC <sub>2</sub><br>Cold seeps bottom layer<br>day mat            | Zhou                | 0.726                                                           | 0.624<br>0.081 |                                                                |                |                                                                           |                   |                     |
|                                                                           | Kt                  | 0.630                                                           | 0.748<br>0.732 | 0.371<br>0.706                                                 | 0.058          |                                                                           |                   |                     |
| 1766 CT3 S <sub>41</sub><br>Hydrothermal vents surface layer<br>White mat | Zhou<br>Replicate 1 | 0.923                                                           | 0.914<br>0.723 | 0.932<br>0.695                                                 | 0.306<br>0.301 |                                                                           |                   |                     |
|                                                                           | Kt<br>Replicate 1   | 0.953                                                           | 0.946<br>0.772 | 0.910<br>0.752                                                 | 0.867<br>0.336 | 0.152<br>0.024                                                            |                   |                     |
|                                                                           | Zhou<br>Replicate 2 | 0.929                                                           | 0.924<br>0.777 | 0.894<br>0.759                                                 | 0.875<br>0.344 | 0.160<br>0.029                                                            | 0.125<br>0.003    |                     |
|                                                                           | Kt<br>Replicate 2   | 0.888                                                           | 0.887<br>0.746 | 0.855<br>0.721                                                 | 0.824<br>0.359 | 0.119<br>0.014                                                            | 0.127<br>0.006    | 0.144<br>0.033      |

| ARCHAEA<br>Yue & Clayton                                                  |                     | 1758 CT8 SC <sub>1</sub><br>Cold seeps surface layer<br>day mat |                | 1758 CT8 SC <sub>2</sub><br>Cold seeps bottom layer<br>day mat |                | 1766 CT3 S <sub>41</sub><br>Hydrothermal vents surface layer<br>White mat |                   |                     |
|---------------------------------------------------------------------------|---------------------|-----------------------------------------------------------------|----------------|----------------------------------------------------------------|----------------|---------------------------------------------------------------------------|-------------------|---------------------|
|                                                                           |                     | Zhou                                                            | Kt             | Zhou                                                           | Kt             | Zhou<br>Replicate 1                                                       | Kt<br>Replicate 1 | Zhou<br>Replicate 2 |
|                                                                           |                     | 1758 CT8 SC <sub>1</sub><br>Cold seeps surface layer<br>day mat | Kt             | 0.919<br>0.004                                                 |                |                                                                           |                   |                     |
| 1758 CT8 SC <sub>2</sub><br>Cold seeps bottom layer<br>day mat            | Zhou                | 0.731                                                           | 0.762<br>0.980 |                                                                |                |                                                                           |                   |                     |
|                                                                           | Kt                  | 0.677                                                           | 0.714<br>0.975 | 0.058<br>0.003                                                 |                |                                                                           |                   |                     |
| 1766 CT3 S <sub>41</sub><br>Hydrothermal vents surface layer<br>White mat | Zhou<br>Replicate 1 | 0.155                                                           | 0.204<br>0.723 | 0.696<br>0.733                                                 | 0.621<br>0.285 |                                                                           |                   |                     |
|                                                                           | Kt<br>Replicate 1   | 0.088                                                           | 0.939<br>0.775 | 0.952<br>0.782                                                 | 0.958<br>0.223 | 0.759<br>0.092                                                            |                   |                     |
|                                                                           | Zhou<br>Replicate 2 | 0.364                                                           | 0.418<br>0.839 | 0.618<br>0.644                                                 | 0.500<br>0.136 | 0.086<br>0.051                                                            | 0.872<br>0.019    |                     |
|                                                                           | Kt<br>Replicate 2   | 0.977                                                           | 0.977<br>0.825 | 0.965<br>0.630                                                 | 0.974<br>0.212 | 0.804<br>0.034                                                            | 0.008<br>0.009    | 0.713<br>0.007      |

| BACTERIA<br>Bray-Curtis                                                   |                     | 1758 CT8 SC <sub>1</sub><br>Cold seeps surface layer<br>day mat |                | 1758 CT8 SC <sub>2</sub><br>Cold seeps bottom layer<br>day mat |                | 1766 CT3 S <sub>41</sub><br>Hydrothermal vents surface layer<br>White mat |                   |                     |
|---------------------------------------------------------------------------|---------------------|-----------------------------------------------------------------|----------------|----------------------------------------------------------------|----------------|---------------------------------------------------------------------------|-------------------|---------------------|
|                                                                           |                     | Zhou                                                            | Kt             | Zhou                                                           | Kt             | Zhou<br>Replicate 1                                                       | Kt<br>Replicate 1 | Zhou<br>Replicate 2 |
|                                                                           |                     | 1758 CT8 SC <sub>1</sub><br>Cold seeps surface layer<br>day mat | Kt             | 0.239<br>0.111                                                 |                |                                                                           |                   |                     |
| 1758 CT8 SC <sub>2</sub><br>Cold seeps bottom layer<br>day mat            | Zhou                | 0.673                                                           | 0.663<br>0.569 |                                                                |                |                                                                           |                   |                     |
|                                                                           | Kt                  | 0.670                                                           | 0.613<br>0.597 | 0.451<br>0.585                                                 | 0.122          |                                                                           |                   |                     |
| 1766 CT3 S <sub>41</sub><br>Hydrothermal vents surface layer<br>White mat | Zhou<br>Replicate 1 | 0.863                                                           | 0.850<br>0.869 | 0.824<br>0.616                                                 | 0.819<br>0.426 |                                                                           |                   |                     |
|                                                                           | Kt<br>Replicate 1   | 0.855                                                           | 0.866<br>0.662 | 0.813<br>0.687                                                 | 0.810<br>0.433 | 0.300<br>0.122                                                            |                   |                     |
|                                                                           | Zhou<br>Replicate 2 | 0.855                                                           | 0.847<br>0.659 | 0.796<br>0.663                                                 | 0.788<br>0.432 | 0.306<br>0.129                                                            | 0.333<br>0.075    |                     |
|                                                                           | Kt<br>Replicate 2   | 0.813                                                           | 0.820<br>0.619 | 0.763<br>0.621                                                 | 0.752<br>0.441 | 0.354<br>0.085                                                            | 0.300<br>0.090    | 0.369<br>0.103      |

| ARCHAEA<br>Bray-Curtis                                                    |                     | 1758 CT8 SC <sub>1</sub><br>Cold seeps surface layer<br>day mat |                | 1758 CT8 SC <sub>2</sub><br>Cold seeps bottom layer<br>day mat |                | 1766 CT3 S <sub>41</sub><br>Hydrothermal vents surface layer<br>White mat |                   |                     |
|---------------------------------------------------------------------------|---------------------|-----------------------------------------------------------------|----------------|----------------------------------------------------------------|----------------|---------------------------------------------------------------------------|-------------------|---------------------|
|                                                                           |                     | Zhou                                                            | Kt             | Zhou                                                           | Kt             | Zhou<br>Replicate 1                                                       | Kt<br>Replicate 1 | Zhou<br>Replicate 2 |
|                                                                           |                     | 1758 CT8 SC <sub>1</sub><br>Cold seeps surface layer<br>day mat | Kt             | 0.139<br>0.077                                                 |                |                                                                           |                   |                     |
| 1758 CT8 SC <sub>2</sub><br>Cold seeps bottom layer<br>day mat            | Zhou                | 0.741                                                           | 0.748<br>0.665 |                                                                |                |                                                                           |                   |                     |
|                                                                           | Kt                  | 0.718                                                           | 0.733<br>0.695 | 0.254<br>0.063                                                 |                |                                                                           |                   |                     |
| 1766 CT3 S <sub>41</sub><br>Hydrothermal vents surface layer<br>White mat | Zhou<br>Replicate 1 | 0.477                                                           | 0.477<br>0.700 | 0.696<br>0.710                                                 | 0.600<br>0.446 | 0.427                                                                     |                   |                     |
|                                                                           | Kt<br>Replicate 1   | 0.903                                                           | 0.899<br>0.748 | 0.829<br>0.467                                                 | 0.836<br>0.391 | 0.507<br>0.189                                                            |                   |                     |
|                                                                           | Zhou<br>Replicate 2 | 0.602                                                           | 0.601<br>0.797 | 0.663<br>0.803                                                 | 0.668<br>0.341 | 0.232<br>0.024                                                            | 0.543<br>0.150    |                     |
|                                                                           | Kt<br>Replicate 2   | 0.957                                                           | 0.955<br>0.795 | 0.881<br>0.798                                                 | 0.870<br>0.398 | 0.607<br>0.211                                                            | 0.130<br>0.143    | 0.560<br>0.131      |

| BACTERIA<br>Morisita-Horn                                                 |                     | 1758 CT8 SC <sub>1</sub><br>Cold seeps surface layer<br>day mat |                | 1758 CT8 SC <sub>2</sub><br>Cold seeps bottom layer<br>day mat |                | 1766 CT3 S <sub>41</sub><br>Hydrothermal vents surface layer<br>White mat |                   |                     |
|---------------------------------------------------------------------------|---------------------|-----------------------------------------------------------------|----------------|----------------------------------------------------------------|----------------|---------------------------------------------------------------------------|-------------------|---------------------|
|                                                                           |                     | Zhou                                                            | Kt             | Zhou                                                           | Kt             | Zhou<br>Replicate 1                                                       | Kt<br>Replicate 1 | Zhou<br>Replicate 2 |
|                                                                           |                     | 1758 CT8 SC <sub>1</sub><br>Cold seeps surface layer<br>day mat | Kt             | 0.089<br>0.012                                                 |                |                                                                           |                   |                     |
| 1758 CT8 SC <sub>2</sub><br>Cold seeps bottom layer<br>day mat            | Zhou                | 0.370                                                           | 0.463<br>0.517 |                                                                |                |                                                                           |                   |                     |
|                                                                           | Kt                  | 0.710                                                           | 0.595<br>0.577 | 0.228<br>0.546                                                 | 0.009          |                                                                           |                   |                     |
| 1766 CT3 S <sub>41</sub><br>Hydrothermal vents surface layer<br>White mat | Zhou<br>Replicate 1 | 0.857                                                           | 0.842<br>0.596 | 0.805<br>0.532                                                 | 0.752<br>0.177 |                                                                           |                   |                     |
|                                                                           | Kt<br>Replicate 1   | 0.910                                                           | 0.868<br>0.828 | 0.835<br>0.603                                                 | 0.765<br>0.202 | 0.071<br>0.092                                                            |                   |                     |
|                                                                           | Zhou<br>Replicate 2 | 0.867                                                           | 0.859<br>0.635 | 0.808<br>0.607                                                 | 0.778<br>0.209 | 0.087<br>0.035                                                            | 0.067<br>0.001    |                     |
|                                                                           | Kt<br>Replicate 2   | 0.815                                                           | 0.707<br>0.595 | 0.746<br>0.564                                                 | 0.700<br>0.211 | 0.064<br>0.007                                                            | 0.008<br>0.005    | 0.077<br>0.005      |

| ARCHAEA<br>Morisita-Horn                                                  |                     | 1758 CT8 SC <sub>1</sub><br>Cold seeps surface layer<br>day mat |                | 1758 CT8 SC <sub>2</sub><br>Cold seeps bottom layer<br>day mat |                | 1766 CT3 S <sub>41</sub><br>Hydrothermal vents surface layer<br>White mat |                   |                     |
|---------------------------------------------------------------------------|---------------------|-----------------------------------------------------------------|----------------|----------------------------------------------------------------|----------------|---------------------------------------------------------------------------|-------------------|---------------------|
|                                                                           |                     | Zhou                                                            | Kt             | Zhou                                                           | Kt             | Zhou<br>Replicate 1                                                       | Kt<br>Replicate 1 | Zhou<br>Replicate 2 |
|                                                                           |                     | 1758 CT8 SC <sub>1</sub><br>Cold seeps surface layer<br>day mat | Kt             | 0.070<br>0.002                                                 |                |                                                                           |                   |                     |
| 1758 CT8 SC <sub>2</sub><br>Cold seeps bottom layer<br>day mat            | Zhou                | 0.576                                                           | 0.616<br>0.991 |                                                                |                |                                                                           |                   |                     |
|                                                                           | Kt                  | 0.512                                                           | 0.555<br>0.942 | 0.060<br>0.944                                                 | 0.001          |                                                                           |                   |                     |
| 1766 CT3 S <sub>41</sub><br>Hydrothermal vents surface layer<br>White mat | Zhou<br>Replicate 1 | 0.084                                                           | 0.113<br>0.596 | 0.500<br>0.579                                                 | 0.450<br>0.188 | 0.188                                                                     |                   |                     |
|                                                                           | Kt<br>Replicate 1   | 0.884                                                           | 0.885<br>0.632 | 0.906<br>0.642                                                 | 0.919<br>0.148 | 0.612<br>0.115                                                            | 0.006             |                     |
|                                                                           | Zhou<br>Replicate 2 | 0.222                                                           | 0.263<br>0.712 | 0.447<br>0.729                                                 | 0.419<br>0.073 | 0.045<br>0.028                                                            | 0.506<br>0.009    |                     |
|                                                                           | Kt<br>Replicate 2   | 0.955                                                           | 0.956<br>0.702 | 0.983<br>0.710                                                 | 0.950<br>0.119 | 0.873<br>0.017                                                            | 0.004<br>0.005    | 0.554<br>0.004      |

**Table S5:** Yue & Clayton, Bray-Curtis and Morisita-Horn indexes for *Bacteria* (Bact1 / Bact2 regions) and *Archaea* (Arch1 / Arch2 regions) according to OTU composition between samples, replicates, extraction methods and amplified regions at level of dissimilarity of 10%. These indexes are scored on a scale of 0 to 1, where 0 represents identity between samples and 1 represents complete dissimilarity. Dark cells indicate same sample comparisons.

## References (Supplemental material)

1. **Cambon-Bonavita MA, Nadalig T, Roussel E, Delage E, Duperron S, Caprais JC, Boetius A, Sibuet M.** 2009. Diversity and distribution of methane-oxidizing microbial communities associated with different faunal assemblages in a giant pockmark of the Gabon continental margin. *Deep-Sea Res Pt II* **56**:2248-2258.
2. **Dhillon A, Teske A, Dillon J, Stahl DA, Sogin ML.** 2003. Molecular characterization of sulfate-reducing bacteria in the Guaymas Basin. *Applied and environmental microbiology* **69**:2765-2772.
3. **Lloyd KG, Lapham L, Teske A.** 2006. An Anaerobic Methane-Oxidizing Community of ANME-1b Archaea in Hypersaline Gulf of Mexico Sediments. *Applied and environmental microbiology* **72**:7218-7230.
4. **Lloyd KG, Albert DB, Biddle JF, Chanton JP, Pizarro O, Teske A.** 2010. Spatial structure and activity of sedimentary microbial communities underlying a Beggiatoa spp. mat in a Gulf of Mexico hydrocarbon seep. *PLoS One* **5**:e8738.
5. **Pachiadaki MG, Lykousis V, Stefanou EG, Kormas KA.** 2010. Prokaryotic community structure and diversity in the sediments of an active submarine mud volcano (Kazan mud volcano, East Mediterranean Sea). *FEMS microbiology ecology* **72**:429-444.
6. **Schreiber L, Holler T, Knittel K, Meyerdierks A, Amann R.** 2010. Identification of the dominant sulfate-reducing bacterial partner of anaerobic methanotrophs of the ANME-2 clade. *Environmental microbiology* **12**:2327-2340.
7. **Teske A, Hinrichs KU, Edgcomb V, Gomez AD, Kysela D, Sylva SP, Sogin ML, Jannasch HW.** 2002. Microbial diversity of hydrothermal sediments in the Guaymas Basin: Evidence for anaerobic methanotrophic communities. *Applied and environmental microbiology* **68**:1994-2007.
8. **Webster G, Parkes RJ, Fry JC, Weightman AJ.** 2004. Widespread occurrence of a novel division of bacteria identified by 16S rRNA gene sequences originally found in deep marine Sediments. *Applied and environmental microbiology* **70**:5708-5713.
9. **Dojka MA, Hugenholtz P, Haack SK, Pace NR.** 1998. Microbial diversity in a hydrocarbon- and chlorinated-solvent-contaminated aquifer undergoing intrinsic bioremediation. *Applied and environmental microbiology* **64**:3869-3877.
10. **Harris JK, Kelley ST, Pace NR.** 2004. New perspective on uncultured bacterial phylogenetic division OP11. *Applied and environmental microbiology* **70**:845-849.
11. **Knittel K, Boetius A, Lemke A, Eilers H, Lochte K, Pfannkuche O, Linke P, Amann R.** 2003. Activity, distribution, and diversity of sulfate reducers and other bacteria in sediments above gas hydrate (Cascadia margin, Oregon). *Geomicrobiol J* **20**:269-294.
12. **Vigneron A, Cruaud P, Pignet P, Caprais J-C, Gayet N, Cambon-Bonavita M-A, Godfroy A, Toffin L.** 2014. Bacterial communities and syntrophic associations involved in anaerobic oxidation of methane process of the Sonora Margin cold seeps, Guaymas Basin. *Environmental microbiology*:n/a-n/a.
13. **Webster G, John Parkes R, Cragg BA, Newberry CJ, Weightman AJ, Fry JC.** 2006. Prokaryotic community composition and biogeochemical processes in deep subseafloor sediments from the Peru Margin. *FEMS microbiology ecology* **58**:65-85.
14. **Durand L, Roumagnac M, Cuffe-Gauchard V, Jan C, Guri M, Tessier C, Haond M, Crassous P, Zbinden M, Arnaud-Haond S, Cambon Bonavita M-A.** *in prep.* Biogeographical distribution of *Rimicaris exoculata* epibiont communities along the Mid-Atlantic Ridge hydrothermal vent sites.
15. **Emerson D, Rentz JA, Lilburn TG, Davis RE, Aldrich H, Chan C, Moyer CL.** 2007. A Novel Lineage of Proteobacteria Involved in Formation of Marine Fe-Oxidizing Microbial Mat Communities. *PLoS ONE* **2**:e667.

16. **Harrison BK, Zhang H, Berelson W, Orphan VJ.** 2009. Variations in archaeal and bacterial diversity associated with the sulfate-methane transition zone in continental margin sediments (Santa Barbara Basin, California). *Applied and environmental microbiology* **75**:1487-1499.
17. **Hugenholtz P, Goebel BM, Pace NR.** 1998. Impact of culture-independent studies on the emerging phylogenetic view of bacterial diversity. *J Bacteriol* **180**:4765-4774.
18. **Inagaki F, Suzuki M, Takai K, Oida H, Sakamoto T, Aoki K, Neilson KH, Horikoshi K.** 2003. Microbial communities associated with geological horizons in coastal subseafloor sediments from the Sea of Okhotsk. *Applied and environmental microbiology* **69**:7224-7235.
19. **Ettwig KF, van Alen T, van de Pas-Schoonen KT, Jetten MSM, Strous M.** 2009. Enrichment and Molecular Detection of Denitrifying Methanotrophic Bacteria of the NC10 Phylum. *Applied and environmental microbiology* **75**:3656-3662.
20. **Rappé MS, Giovannoni SJ.** 2003. THE UNCULTURED MICROBIAL MAJORITY. *Annual Review of Microbiology* **57**:369-394.
21. **Biddle JF, Lipp JS, Lever MA, Lloyd KG, Sorensen KB, Anderson R, Fredricks HF, Elvert M, Kelly TJ, Schrag DP, Sogin ML, Brenchley JE, Teske A, House CH, Hinrichs KU.** 2006. Heterotrophic Archaea dominate sedimentary subsurface ecosystems off Peru. *Proceedings of the National Academy of Sciences of the United States of America* **103**:3846-3851.
22. **Biddle JF, Cardman Z, Mendlovitz H, Albert DB, Lloyd KG, Boetius A, Teske A.** 2012. Anaerobic oxidation of methane at different temperature regimes in Guaymas Basin hydrothermal sediments. *Isme Journal* **6**:1018-1031.
23. **Dang H, Luan XW, Chen R, Zhang X, Guo L, Klotz MG.** 2010. Diversity, abundance and distribution of amoA-encoding archaea in deep-sea methane seep sediments of the Okhotsk Sea. *FEMS microbiology ecology* **72**:370-385.
24. **Dhillon A, Lever M, Lloyd KG, Albert DB, Sogin ML, Teske A.** 2005. Methanogen diversity evidenced by molecular characterization of methyl coenzyme M reductase A (mcrA) genes in hydrothermal sediments of the Guaymas Basin. *Applied and environmental microbiology* **71**:4592-4601.
25. **Kubo K, Lloyd KG, J FB, Amann R, Teske A, Knittel K.** 2012. Archaea of the Miscellaneous Crenarchaeotal Group are abundant, diverse and widespread in marine sediments. *The ISME journal*.
26. **Pachiadaki MG, Kallionaki A, Dahlmann A, De Lange GJ, Kormas KA.** 2011. Diversity and spatial distribution of prokaryotic communities along a sediment vertical profile of a deep-sea mud volcano. *Microb Ecol* **62**:655-668.
27. **Sorensen KB, Teske A.** 2006. Stratified communities of active archaea in deep marine subsurface sediments. *Applied and environmental microbiology* **72**:4596-4603.
28. **Teske A, Sorensen KB.** 2008. Uncultured archaea in deep marine subsurface sediments: have we caught them all? *Isme Journal* **2**:3-18.
29. **Teske A.** 2006. Microbial community composition in deep marine subsurface sediments of ODP Leg 201: sequencing surveys and cultivations. Jørgensen, B.B., D'Hondt, S.L., and Miller, D.J. (Eds.), *Proc. ODP, Sci. Results* **201**.
30. **Vigneron A, Cruaud P, Pignet P, Caprais J-C, Cambon-Bonavita M-A, Godfroy A, Toffin L.** 2013. Archaeal and anaerobic methane oxidizer communities in the Sonora Margin cold seeps, Guaymas Basin (Gulf of California). *The ISME journal*.
